# Supplementary material for: The pathogenPseudomonas aeruginosaoptimizes the production of the siderophore pyochelin upon environmental challenges
Source: Royal Society of Chemistry journal article supplement (doi:10.1039/d0mt00029a), 2020-11-04
Supplement: d0mt00029a1.pdf [file d0mt00029a1.pdf]

**Table S1.** Strains and plasmids used in this study

| Strains and plasmids                      | Collection ID | Relevant characteristic                                                                                             | references                                                    |
|-------------------------------------------|---------------|---------------------------------------------------------------------------------------------------------------------|---------------------------------------------------------------|
| <b>Strains</b>                            |               |                                                                                                                     |                                                               |
| <i>E. coli</i> Top10                      |               | F- mcrA Δ(mrr-hsdRMS-mcrBC) φ80lacZΔM15 ΔlacX74 nupG recA1 araD139 Δ(ara-leu)7697 galE15 galK16 rpsL(StrR ) endA1 λ | Invitrogen                                                    |
| <i>E. coli</i> HB101                      |               | Helper strain carrying pME487                                                                                       |                                                               |
| PAO1 ATCC15692                            | Wild-type     |                                                                                                                     | 47                                                            |
| Δ <i>pvdF</i>                             | PAS263        | PAO1; <i>pvdF</i> chromosomally deleted                                                                             | 31                                                            |
| Δ <i>pchA</i>                             | PAS282        | PAO1; <i>pchA</i> chromosomally deleted                                                                             | 21                                                            |
| Δ <i>pvdF</i> Δ <i>pchA</i>               | PAS283        | PAO1; <i>pvdF</i> and <i>pchA</i> chromosomally deleted                                                             | 33                                                            |
| Δ <i>pvdF</i> Δ <i>pchA</i> Δ <i>pchR</i> | PAS285        | PAO1; <i>pvdF</i> , <i>pchA</i> and <i>pchR</i> chromosomally deleted                                               | 48                                                            |
| Δ <i>pvdS</i>                             | PAS386        | PAO1; <i>pvdS</i> chromosomally deleted                                                                             | 48                                                            |
| PAO1 <i>pchEmcherry</i>                   | PAS195        | PAO1; <i>mcherry</i> fused to 3' of <i>pchE</i>                                                                     | 21                                                            |
| Δ <i>pvdSpchEmcherry</i>                  |               | PAO1; <i>pvdS</i> chromosomally deleted, <i>mcherry</i> fused to 3' of <i>pchE</i>                                  | 48                                                            |
| Δ <i>fptA</i>                             |               | PAO1; <i>fptA</i> chromosomally deleted                                                                             | 21                                                            |
| Δ <i>pvdS</i> Δ <i>fptA</i>               |               | PAO1; <i>pvdS</i> and <i>fptA</i> chromosomally deleted                                                             | 21                                                            |
| <b>plasmids</b>                           |               |                                                                                                                     |                                                               |
| <b>Expression plasmids</b>                |               |                                                                                                                     |                                                               |
| pSEVA631                                  |               | Expression plasmid carrying a Gm cassette                                                                           | <a href="http://seva.cnb.csic.es">http://seva.cnb.csic.es</a> |
| pSEVA631- <i>p(pchDFurPchR)</i>           | pAYC3         | Fur box of <i>fptA</i> promoter fused to <i>mcherry</i> ORF                                                         | This study                                                    |
| pSEVA631- <i>p(fptAFurPchR)</i>           | pAYC4         | Fur + PchR box of <i>fptA</i> promoter fused to <i>mcherry</i> ORF                                                  | This study                                                    |
| pSEVA631- <i>p(pchDFur)</i>               | pAYC5         | Fur box of <i>pchD</i> promoter fused to <i>mcherry</i> ORF                                                         | This study                                                    |

|                                                  |       |                                                             |               |
|--------------------------------------------------|-------|-------------------------------------------------------------|---------------|
| pSEVA631-p( <i>fptAFur</i> )                     | pAYC6 | Fur + PchR box of <i>pchD</i> promoter fused to mcherry ORF | <sup>35</sup> |
| pSEVA631- <i>pvdF</i> promoter                   | pPF4  | <i>pvdF</i> promoter fused to mcherry ORF                   | This study    |
| pSEVA631-p( <i>pchD</i> Fur <sub>mut</sub> PchR) | pAF35 | pAYC5 carrying a replacement CATT in GTAA (see Figure 4)    | <sup>35</sup> |

47 Stover C. K., Pham X. Q., Erwin A. L., Mizoguchi S. D., Warrenner P., Hickey M. J., Brinkman F. S., Hufnagle W. O., Kowalik D. J., Lagrou M., Garber R. L., Goltry L., Tolentino E., Westbrook-Wadman S., Yuan Y., Brody L. L., Coulter S. N., Folger K. R., Kas A., Larbig K., Lim R., Smith K., Spencer D., Wong G. K., Wu Z., Paulsen I. T., Reizer J., Saier M. H., Hancock R. E., Lory S., Olson M. V., Nature959-9642000

48 Guillon L., Altenburger S., Graumann P. L., Schalk I. J., PLoS One791112013  
 Guillon L., Altenburger S., Graumann P. L., Schalk I. J., PLoS One 2013 e79111

**Table S2.** Oligonucleotides used in this study

| Oligonucleotides            | Sequences 5'-3'                                            | Used for the following construct |
|-----------------------------|------------------------------------------------------------|----------------------------------|
| <i>Cloning</i>              |                                                            |                                  |
| fptA Fur Box Fwd            | ATATATGAATT <u>CGGTCGTCGTCGC</u> CAGAGC                    | pAYC3                            |
| fptA Fur Box Rev            | CCATGTTA TCCTCCTCGC CCTTGCTCAC CAT CAGGTTT TCCTGTAGCC CGGG | pAYC3                            |
| fptA PchR Box & Fur Box Fwd | CAAAGAATT <u>CGGGCGAGGAAAGTTCCGCGAC</u> G                  | pAYC4                            |
| fptA PchR Box & Fur Box Rev | CATGTTATCCTCCTCGCCCTTGCTCACCATCG TTCGAACAGCCTCGGGG         | pAYC4                            |
| pchD Fur Box Fwd            | CAAAGAATT <u>CGAAACGCCGAAGAATTTCTCC</u> CCTC               | pAYC6                            |
| pchD Fur box Rev            | GAAGGCATAA CTGGAACCCT CGATGGTGAG CAAGGGCGAG GAGGATAACA TGG | pAYC6                            |
| pvdF Fwd                    | ATATATGAATT CCTGGCGCAG GCTTTCG                             | pPF4                             |
| pvdF Rev                    | CCATGTTA TCCTCCTCGC CCTTGCTCAC CAT TTCATCATTCCAGGAGTGG     | pPF4                             |
| mCHERRY Fwd                 | GTGAGCAAGGGCGAGGAGGATAACATG                                | pAYC and pPF series              |
| mcherry hindIII rev         | CTCCAAGCTTTTACTTGTACAGCTCGTCCATG CCGC                      | pAYC and pPF series              |
| <i>qRT-PCR</i>              |                                                            |                                  |
| FpvR F1                     | GGTCGAACTGGACCTCAATAC                                      |                                  |
| FpvR R1                     | CGTGGGTGACATGGAAGTAG                                       |                                  |
| PvdS F1                     | CAGGCGCTCGAACAGAAATA                                       |                                  |
| PvdS R1                     | CGTAGTTGATGTGCGAGGTT                                       |                                  |
| FpvI F1                     | CAGATCGCCGAACATCTCAATA                                     |                                  |

---

|                 |                          |
|-----------------|--------------------------|
| FpvI R1         | CACCCGACAGTGCTTCATC      |
| uvrD F          | CTACGGTAGCGAGACCTACAACAA |
| uvrD R          | GCGGCTGACGGTATTGGA       |
| PvdA R qRT      | TGGTATTCGCGCAGCAAAC      |
| PvdA F qRT      | CGCCGAAGTTCACCGATCT      |
| fpvA F qRT      | AGCCGCCTACCAGGATAAGC     |
| fpvA R qRT      | TGCCGTAATAGACGCTGGTTT    |
| fptA F qRT      | GCGCCTGGGCTACAAGATC      |
| fptA R qRT      | CCGTAGCGGTTGTTCCAGTT     |
| fptX F qRT      | CCCTGGGTGGTCAAGTTCCT     |
| fptX R qRT      | CGGCGCGACCAGTGA          |
| pvdJ F qRT      | CGTGGCCGCGATATGG         |
| pvdJ R qRT      | CTCTTCAGGCTGACTTCGATACC  |
| pchE F qRT      | GGCAATGGCAAGGTCGAT       |
| pchE R qRT      | CACCGGGCGTTTGAGAAC       |
| qRT-PCR-PchR-Fw | CGGCTTTCGCAAGGTGTT       |
| qRT-PCR-PchR-Rv | AGGCGGTATTCCTGCAGGTA     |

---

**Table S3**

|                                         |                                                                                            |                                                         |                                                 |
|-----------------------------------------|--------------------------------------------------------------------------------------------|---------------------------------------------------------|-------------------------------------------------|
| <b>range</b><br><b>OD<sub>600</sub></b> | <b>Growth conditions</b>                                                                   |                                                         |                                                 |
| <b>OD</b>                               | <b>no additives</b><br><b>0.25-0.3</b>                                                     | <b>0,5 <math>\mu</math>M iron</b><br><b>0.6-0.7</b>     | <b>5 <math>\mu</math>M iron</b><br><b>1-1.1</b> |
| <b>OD</b>                               | <b>Desferrioxamine</b><br><b>(0-10 mM)</b><br><b>0.2-0.3</b>                               | <b>Deferasirox</b><br><b>(0-4 mM)</b><br><b>0.1-0.3</b> |                                                 |
| <b>OD</b>                               | <b>exjade (0-1 mM)</b><br><b>in <math>\Delta pvdS\Delta fptA</math></b><br><b>0.01-0.3</b> |                                                         |                                                 |
