# Supplementary material for: The pathogenPseudomonas aeruginosaoptimizes the production of the siderophore pyochelin upon environmental challenges
Source: Royal Society of Chemistry journal article supplement (doi:10.1039/d0mt00029a), 2020-11-04
Supplement: d0mt00029a3.xlsx [file d0mt00029a3.xlsx]

## Sheet: table S4
								Table S4	Expression values from the proteomic analysis of genes in PAO1 wt versus DpchADpvdF cells grown in CAA medium
	Protein names	Gene	names						proteinDescription	log2ratio	pValue	qValue
9948841	Uncharacterized protein	PA2761						PA2761	hypothetical protein PA2761 [Pseudomonas aeruginosa PAO1]	10.9303	0.0651198	0.29789
9948025	Uncharacterized protein	PA2021						PA2021	hypothetical protein PA2021 [Pseudomonas aeruginosa PAO1]	10.551	0.110803	0.377559
9949967	Uncharacterized protein	PA3794						PA3794	hypothetical protein PA3794 [Pseudomonas aeruginosa PAO1]	10.3861	0.0574155	0.282939
9946754	Morphogene protein BolA	bolA	PA0857					PA0857	morphogene protein BolA [Pseudomonas aeruginosa PAO1]	10.1349	0.00284673	0.0960163
9949322	Uncharacterized protein	PA3202						PA3202	conserved hypothetical protein [Pseudomonas aeruginosa PAO1]	9.58555	0.0184236	0.193769
9947524	Ribosomal RNA large subunit methyltransferase M (EC 2.1.1.186) (23S rRNA (cytidine2498-2'-O)-methyltransferase) (23S rRNA 2'-O-ribose methyltransferase RlmM)	rlmM	PA1563					PA1563	conserved hypothetical protein [Pseudomonas aeruginosa PAO1]	9.33534	0.05525	0.276367
9948905	Uncharacterized protein	PA2820						PA2820	hypothetical protein PA2820 [Pseudomonas aeruginosa PAO1]	9.01056	0.281114	0.553097
9951600	Uncharacterized protein	PA5286						PA5286	conserved hypothetical protein [Pseudomonas aeruginosa PAO1]	6.62278	0.094394	0.350967
9947328	Uncharacterized protein	PA1383						PA1383	hypothetical protein PA1383 [Pseudomonas aeruginosa PAO1]	6.24482	0.616784	0.795752
9950796	Type 4 fimbrial biogenesis protein PilV	pilV	PA4551					PA4551	type 4 fimbrial biogenesis protein PilV [Pseudomonas aeruginosa PAO1]	4.43475	0.0362786	0.241022
9951340	50S ribosomal protein L31	rpmE	PA5049					PA5049	50S ribosomal protein L31 [Pseudomonas aeruginosa PAO1]	4.20651	0.417803	0.664713
9950445	Pyochelin biosynthetic protein PchC	pchC	PA4229					PA4229	pyochelin biosynthetic protein PchC [Pseudomonas aeruginosa PAO1]	4.05658	7.89863e-06	0.00332455
9951168	Urease accessory protein UreG	ureG	PA4893					PA4893	urease accessory protein UreG [Pseudomonas aeruginosa PAO1]	4.04468	0.23586	0.51158
9951621	Uncharacterized protein	PA5305						PA5305	conserved hypothetical protein [Pseudomonas aeruginosa PAO1]	4.01562	0.207247	0.487719
9950896	Uncharacterized protein	PA4643						PA4643	hypothetical protein PA4643 [Pseudomonas aeruginosa PAO1]	3.74873	0.162098	0.438487
9950433	Uncharacterized protein PA4219	PA4219						PA4219	hypothetical protein PA4219 [Pseudomonas aeruginosa PAO1]	3.50479	0.115235	0.382775
9946235	tRNA (guanine-N(7)-)-methyltransferase (EC 2.1.1.33) (tRNA (guanine(46)-N(7))-methyltransferase) (tRNA(m7G46)-methyltransferase)	trmB	PA0382					PA0382	DNA mismatch repair protein MicA [Pseudomonas aeruginosa PAO1]	3.49074	0.0943275	0.350967
9951161	Probable major facilitator superfamily (MFS) transporter	PA4887						PA4887	probable major facilitator superfamily (MFS) transporter [Pseudomonas aeruginosa PAO1]	3.38439	0.102951	0.367917
9951137	Urease accessory protein UreD	ureD	PA4864					PA4864	urease accessory protein [Pseudomonas aeruginosa PAO1]	3.28443	0.613793	0.793351
9946060	Probable dihydrodipicolinate synthetase	PA0223						PA0223	probable dihydrodipicolinate synthetase [Pseudomonas aeruginosa PAO1]	3.27585	0.000347081	0.0249731
9951622	Uncharacterized protein	PA5306						PA5306	conserved hypothetical protein [Pseudomonas aeruginosa PAO1]	3.15953	0.210415	0.490156
9947753	CmaX protein	cmaX	PA1773					PA1773	CmaX protein [Pseudomonas aeruginosa PAO1]	2.81402	0.560238	0.761321
9951750	Uncharacterized protein	PA5422						PA5422	hypothetical protein PA5422 [Pseudomonas aeruginosa PAO1]	2.81064	0.0804966	0.327677
9948010	Maleylacetoacetate isomerase (MAAI) (EC 5.2.1.2)	maiA	PA2007					PA2007	maleylacetoacetate isomerase [Pseudomonas aeruginosa PAO1]	2.6847	0.00231076	0.0894287
9949422	Probable HIT family protein	PA3295						PA3295	probable HIT family protein [Pseudomonas aeruginosa PAO1]	2.67874	0.0963169	0.353112
9947465	Uncharacterized protein	PA1509						PA1509	hypothetical protein PA1509 [Pseudomonas aeruginosa PAO1]	2.65398	0.641738	0.811104
9951761	Probable acetyltransferase	PA5432						PA5432	probable acetyltransferase [Pseudomonas aeruginosa PAO1]	2.60159	0.0398905	0.245735
9950806	Riboflavin biosynthesis protein (EC 2.7.1.26) (EC 2.7.7.2)	ribF	PA4561					PA4561	riboflavin kinase/FAD synthase [Pseudomonas aeruginosa PAO1]	2.57753	0.280607	0.553016
9947244	Uncharacterized protein	PA1307						PA1307	conserved hypothetical protein [Pseudomonas aeruginosa PAO1]	2.56398	0.160968	0.437336
9951803	Uncharacterized protein	PA5471						PA5471	hypothetical protein PA5471 [Pseudomonas aeruginosa PAO1]	2.56126	0.20803	0.488002
9949732	Uncharacterized isomerase PA3578 (EC 5.1.-.-)	PA3578						PA3578	conserved hypothetical protein [Pseudomonas aeruginosa PAO1]	2.52297	0.570078	0.767363
9950020	Uncharacterized protein	PA3844						PA3844	hypothetical protein PA3844 [Pseudomonas aeruginosa PAO1]	2.43131	0.00481813	0.11907
9949414	Putative ankyrin repeat protein PA3287	PA3287						PA3287	conserved hypothetical protein [Pseudomonas aeruginosa PAO1]	2.36595	0.137408	0.413253
9949058	Type 4 fimbrial biogenesis protein PilZ	pilZ	PA2960					PA2960	type 4 fimbrial biogenesis protein PilZ [Pseudomonas aeruginosa PAO1]	2.35257	0.000728027	0.0410531
9950567	Probable transcriptional regulator	PA4341						PA4341	probable transcriptional regulator [Pseudomonas aeruginosa PAO1]	2.34745	0.329018	0.59344
9950244	Uncharacterized protein	PA4048						PA4048	hypothetical protein PA4048 [Pseudomonas aeruginosa PAO1]	2.34279	0.804639	0.908953
9950435	Protein FptB	fptB	PA4220					PA4220	hypothetical protein PA4220 [Pseudomonas aeruginosa PAO1]	2.23275	0.477743	0.709404
9946530	Uncharacterized protein	PA0653						PA0653	conserved hypothetical protein [Pseudomonas aeruginosa PAO1]	2.16117	0.90505	0.949559
9947820	Uncharacterized protein	PA1834						PA1834	hypothetical protein PA1834 [Pseudomonas aeruginosa PAO1]	2.16101	0.73555	0.872242
9951487	Uncharacterized protein	PA5183						PA5183	hypothetical protein PA5183 [Pseudomonas aeruginosa PAO1]	2.15516	0.624803	0.801033
9951121	Ribosomal protein L11 methyltransferase (L11 Mtase) (EC 2.1.1.-)	prmA	PA4850					PA4850	ribosomal protein L11 methyltransferase [Pseudomonas aeruginosa PAO1]	2.10693	0.137237	0.413253
9946551	Heme oxygenase	hemO	PA0672					PA0672	heme oxygenase [Pseudomonas aeruginosa PAO1]	2.04153	0.103538	0.367917
9946763	4-hydroxyphenylpyruvate dioxygenase (4HPPD) (HPD) (HPPDase) (EC 1.13.11.27)	hpd	PA0865					PA0865	4-hydroxyphenylpyruvate dioxygenase [Pseudomonas aeruginosa PAO1]	2.02132	0.000204915	0.0197032
9948973	Uncharacterized protein	PA2883						PA2883	hypothetical protein PA2883 [Pseudomonas aeruginosa PAO1]	2.0141	0.13162	0.406482
9947968	Uncharacterized protein	PA1969						PA1969	hypothetical protein PA1969 [Pseudomonas aeruginosa PAO1]	1.982	0.0235743	0.209975
9951098	Dihydrolipoyl dehydrogenase 3 (EC 1.8.1.4) (Dihydrolipoamide dehydrogenase 3) (LPD-3)	lpd3	PA4829					PA4829	dihydrolipoamide dehydrogenase 3 [Pseudomonas aeruginosa PAO1]	1.92244	0.637157	0.809358
9947964	Uncharacterized protein	PA1965						PA1965	hypothetical protein PA1965 [Pseudomonas aeruginosa PAO1]	1.91267	0.0265285	0.214459
9946914	Quinolinate synthase A (EC 2.5.1.72)	nadA	PA1004					PA1004	quinolinate synthetase A [Pseudomonas aeruginosa PAO1]	1.90565	0.0943003	0.350967
9950444	Pyochelin biosynthesis protein PchD	pchD	PA4228					PA4228	pyochelin biosynthesis protein PchD [Pseudomonas aeruginosa PAO1]	1.89081	9.33152e-05	0.0122153
9948011	Fumarylacetoacetase	fahA	PA2008					PA2008	fumarylacetoacetase [Pseudomonas aeruginosa PAO1]	1.87464	0.000804958	0.0441978
9948133	O6-methylguanine-DNA methyltransferase	ada	PA2118					PA2118	O6-methylguanine-DNA methyltransferase [Pseudomonas aeruginosa PAO1]	1.86934	0.157065	0.433414
9947906	Uncharacterized protein	PA1913						PA1913	hypothetical protein PA1913 [Pseudomonas aeruginosa PAO1]	1.79581	0.0406947	0.246774
9949781	Lipoprotein NlpD/LppB homolog	PA3623						PA3623	conserved hypothetical protein [Pseudomonas aeruginosa PAO1]	1.77555	0.0844756	0.336762
9948819	50S ribosomal protein L20	rplT	PA2741					PA2741	50S ribosomal protein L20 [Pseudomonas aeruginosa PAO1]	1.71608	0.0171895	0.187891
9947503	Transcriptional activator protein anr	anr	PA1544					PA1544	transcriptional regulator Anr [Pseudomonas aeruginosa PAO1]	1.6789	0.139465	0.414822
9949579	D-erythro-7,8-dihydroneopterin triphosphate epimerase	folX	PA3439					PA3439	d-erythro-7,8-dihydroneopterin triphosphate epimerase [Pseudomonas aeruginosa PAO1]	1.64278	0.35354	0.613305
9947808	NADH pyrophosphatase (EC 3.6.1.22)	nudC	PA1823					PA1823	conserved hypothetical protein [Pseudomonas aeruginosa PAO1]	1.62984	0.0390439	0.245167
9946434	Alkyl hydroperoxide reductase AhpD (EC 1.11.1.15)	PA0565						PA0565	conserved hypothetical protein [Pseudomonas aeruginosa PAO1]	1.61775	0.272809	0.548809
9950238	Exodeoxyribonuclease 7 small subunit (EC 3.1.11.6) (Exodeoxyribonuclease VII small subunit) (Exonuclease VII small subunit)	xseB	PA4042					PA4042	exodeoxyribonuclease VII small subunit [Pseudomonas aeruginosa PAO1]	1.61524	0.00681389	0.130793
9949243	Uncharacterized protein	PA3130						PA3130	hypothetical protein PA3130 [Pseudomonas aeruginosa PAO1]	1.60986	0.0890488	0.345757
9946294	Probable transcriptional regulator	PA0436						PA0436	probable transcriptional regulator [Pseudomonas aeruginosa PAO1]	1.5923	0.131922	0.406482
9950446	Isochorismate pyruvate lyase (IPL) (EC 4.2.99.21) (Chorismate mutase) (CM) (EC 5.4.99.5) (Salicylate biosynthesis protein)	pchB	PA4230					PA4230	salicylate biosynthesis protein PchB [Pseudomonas aeruginosa PAO1]	1.55749	0.00333335	0.102208
9949937	tRNA-specific adenosine deaminase (EC 3.5.4.33)	tadA	PA3767					PA3767	conserved hypothetical protein [Pseudomonas aeruginosa PAO1]	1.54773	0.149621	0.427669
9951311	UPF0061 protein PA5023	PA5023						PA5023	conserved hypothetical protein [Pseudomonas aeruginosa PAO1]	1.54591	0.0941961	0.350967
9950084	Inhibitor of vertebrate lysozyme	ivy	PA3902					PA3902	hypothetical protein PA3902 [Pseudomonas aeruginosa PAO1]	1.54405	0.188997	0.469213
9948412	Uncharacterized protein	PA2373						PA2373	conserved hypothetical protein [Pseudomonas aeruginosa PAO1]	1.53968	0.0259971	0.214393
9948751	Uncharacterized protein	PA2679						PA2679	hypothetical protein PA2679 [Pseudomonas aeruginosa PAO1]	1.52238	0.565191	0.764708
9947761	Assimilatory nitrite reductase large subunit	nirB	PA1781					PA1781	assimilatory nitrite reductase large subunit [Pseudomonas aeruginosa PAO1]	1.52187	0.500697	0.724331
9951140	Urease subunit beta (EC 3.5.1.5) (Urea amidohydrolase subunit beta)	ureB	PA4867					PA4867	urease beta subunit [Pseudomonas aeruginosa PAO1]	1.52177	0.289129	0.558576
9949301	Glucose-6-phosphate 1-dehydrogenase (G6PD) (EC 1.1.1.49)	zwf	PA3183					PA3183	glucose-6-phosphate 1-dehydrogenase [Pseudomonas aeruginosa PAO1]	1.50461	0.553615	0.760504
9951213	30S ribosomal protein S18	rpsR	PA4934					PA4934	30S ribosomal protein S18 [Pseudomonas aeruginosa PAO1]	1.48892	0.451622	0.690596
9947784	ATP-dependent Clp protease proteolytic subunit 1 (EC 3.4.21.92) (Endopeptidase Clp 1)	clpP1	PA1801					PA1801	ATP-dependent Clp protease proteolytic subunit [Pseudomonas aeruginosa PAO1]	1.48291	0.0938418	0.350967
9946748	Uncharacterized protein	PA0851						PA0851	hypothetical protein PA0851 [Pseudomonas aeruginosa PAO1]	1.47388	0.00260848	0.0947481
9950514	Two-component sensor PprA	pprA	PA4293					PA4293	two-component sensor PprA [Pseudomonas aeruginosa PAO1]	1.46589	0.485431	0.713454
9948816	Integration host factor subunit alpha (IHF-alpha)	ihfA	himA	PA2738				PA2738	integration host factor, alpha subunit [Pseudomonas aeruginosa PAO1]	1.45644	0.136017	0.41224
9950441	Dihydroaeruginoic acid synthetase	pchE	PA4226					PA4226	dihydroaeruginoic acid synthetase [Pseudomonas aeruginosa PAO1]	1.44463	0.00203032	0.0857054
9947800	Ribonuclease HI (RNase HI) (EC 3.1.26.4)	rnhA	PA1815					PA1815	ribonuclease H [Pseudomonas aeruginosa PAO1]	1.42252	0.180511	0.460887
9948960	Uncharacterized protein	PA2871						PA2871	hypothetical protein PA2871 [Pseudomonas aeruginosa PAO1]	1.41471	0.727025	0.866048
9947414	Probable plasmid partitioning protein	PA1462						PA1462	probable plasmid partitioning protein [Pseudomonas aeruginosa PAO1]	1.4064	0.21158	0.490707
9948012	Homogentisate 1,2-dioxygenase (HGDO) (EC 1.13.11.5) (Homogentisate oxygenase) (Homogentisic acid oxidase) (Homogentisicase)	hmgA	PA2009					PA2009	homogentisate 1,2-dioxygenase [Pseudomonas aeruginosa PAO1]	1.40111	0.0240764	0.210536
9950736	Probable binding protein component of ABC transporter	PA4497						PA4497	probable binding protein component of ABC transporter [Pseudomonas aeruginosa PAO1]	1.37219	0.989471	0.99692
9949289	Phosphoglycolate phosphatase 2 (PGP 2) (PGPase 2) (EC 3.1.3.18)	gph2	PA3172					PA3172	probable hydrolase [Pseudomonas aeruginosa PAO1]	1.36669	0.140256	0.414822
9946401	Uncharacterized protein	PA0534						PA0534	conserved hypothetical protein [Pseudomonas aeruginosa PAO1]	1.36149	0.00372291	0.107192
9946474	Probable two-component response regulator	PA0601						PA0601	probable two-component response regulator [Pseudomonas aeruginosa PAO1]	1.359	0.334905	0.599477
9947390	Uncharacterized protein	PA1440						PA1440	hypothetical protein PA1440 [Pseudomonas aeruginosa PAO1]	1.35717	0.605512	0.788762
9947802	Uncharacterized protein	PA1817						PA1817	hypothetical protein PA1817 [Pseudomonas aeruginosa PAO1]	1.35335	0.141811	0.41761
9947005	Uncharacterized protein	PA1089						PA1089	conserved hypothetical protein [Pseudomonas aeruginosa PAO1]	1.33855	0.00623876	0.122281
9951027	DNA repair protein RecN (Recombination protein N)	recN	PA4763					PA4763	DNA repair protein RecN [Pseudomonas aeruginosa PAO1]	1.33448	0.972681	0.988167
9946265	Protein PilI	pilI	PA0410					PA0410	twitching motility protein PilI [Pseudomonas aeruginosa PAO1]	1.32659	0.0925325	0.349551
9950082	Probable transmembrane sensor	PA3900						PA3900	probable transmembrane sensor [Pseudomonas aeruginosa PAO1]	1.32271	0.315097	0.582955
122920662	Alkyl hydroperoxide reductase AhpD (EC 1.11.1.15)	PA0269						PA0269	Chain A, Structure Of A Conserved Protein Of Unknown Function Pa0269 From Pseudomonas Aeruginosa	1.32072	0.0148017	0.177395
9950821	UPF0114 protein PA4574	PA4574						PA4574	conserved hypothetical protein [Pseudomonas aeruginosa PAO1]	1.31342	0.24138	0.515279
9951693	Uncharacterized protein	PA5371						PA5371	conserved hypothetical protein [Pseudomonas aeruginosa PAO1]	1.30383	0.00987255	0.152841
9948941	Major outer membrane lipoprotein (Outer membrane lipoprotein I)	oprI	PA2853					PA2853	Outer membrane lipoprotein OprI precursor [Pseudomonas aeruginosa PAO1]	1.28386	0.583807	0.773929
9948124	Uncharacterized protein	PA2110						PA2110	hypothetical protein PA2110 [Pseudomonas aeruginosa PAO1]	1.27763	0.0666676	0.301537
9946451	tRNA N6-adenosine threonylcarbamoyltransferase (EC 2.3.1.234) (N6-L-threonylcarbamoyladenine synthase) (t(6)A synthase) (t(6)A37 threonylcarbamoyladenosine biosynthesis protein TsaD) (tRNA threonylcarbamoyladenosine biosynthesis protein TsaD)	tsaD	gcp	PA0580				PA0580	O-sialoglycoprotein endopeptidase [Pseudomonas aeruginosa PAO1]	1.27549	0.201184	0.479402
9950498	Type III pantothenate kinase (EC 2.7.1.33) (PanK-III) (Pantothenic acid kinase)	coaX	coaA	PA4279				PA4279	hypothetical protein PA4279 [Pseudomonas aeruginosa PAO1]	1.26636	0.287506	0.556851
9951632	50S ribosomal protein L33	rpmG	PA5315					PA5315	50S ribosomal protein L33 [Pseudomonas aeruginosa PAO1]	1.26453	0.305937	0.571906
9947035	Uncharacterized protein	PA1116						PA1116	hypothetical protein PA1116 [Pseudomonas aeruginosa PAO1]	1.19861	0.634811	0.808844
9946010	Probable purine-binding chemotaxis protein	PA0177						PA0177	probable purine-binding chemotaxis protein [Pseudomonas aeruginosa PAO1]	1.19389	0.239406	0.514319
9949760	Response regulator ErdR	erdR	PA3604					PA3604	response regulator ErdR [Pseudomonas aeruginosa PAO1]	1.18997	0.0211548	0.199786
9950432	Probable transporter	PA4218						PA4218	probable transporter [Pseudomonas aeruginosa PAO1]	1.14811	0.0852239	0.337607
9950957	Uncharacterized protein	PA4699						PA4699	hypothetical protein PA4699 [Pseudomonas aeruginosa PAO1]	1.14666	0.290791	0.558576
9950454	50S ribosomal protein L17	rplQ	PA4237					PA4237	50S ribosomal protein L17 [Pseudomonas aeruginosa PAO1]	1.14195	0.00909782	0.145135
9951143	Uncharacterized protein	PA4870						PA4870	conserved hypothetical protein [Pseudomonas aeruginosa PAO1]	1.13693	0.767594	0.892295
9946061	Probable aldolase	PA0224						PA0224	probable aldolase [Pseudomonas aeruginosa PAO1]	1.13638	0.0185621	0.193769
9951420	Uncharacterized protein	PA5122						PA5122	hypothetical protein PA5122 [Pseudomonas aeruginosa PAO1]	1.13262	0.587212	0.776709
9948685	Translation initiation factor IF-1	infA	PA2619					PA2619	initiation factor [Pseudomonas aeruginosa PAO1]	1.12888	0.00127469	0.0626987
9946996	Flagellar hook protein FlgE	flgE	PA1080					PA1080	flagellar hook protein FlgE [Pseudomonas aeruginosa PAO1]	1.1255	0.24946	0.521247
9949628	Uncharacterized protein	PA3483						PA3483	hypothetical protein PA3483 [Pseudomonas aeruginosa PAO1]	1.09688	0.584539	0.774288
9951031	Ribosome association toxin RatA	ratA	PA4767					PA4767	conserved hypothetical protein [Pseudomonas aeruginosa PAO1]	1.08233	0.0651888	0.29789
9949059	DNA polymerase III subunit delta' (EC 2.7.7.7)	holB	PA2961					PA2961	DNA polymerase III, delta prime subunit [Pseudomonas aeruginosa PAO1]	1.0782	0.270983	0.547766
9946965	Probable transporter	PA1051						PA1051	probable transporter [Pseudomonas aeruginosa PAO1]	1.06072	0.34503	0.607017
9947997	Uncharacterized protein	PA1995						PA1995	hypothetical protein PA1995 [Pseudomonas aeruginosa PAO1]	1.05759	0.183423	0.462617
9948953	Uncharacterized protein	PA2864						PA2864	conserved hypothetical protein [Pseudomonas aeruginosa PAO1]	1.05592	0.0105352	0.154611
9949441	Probable 3-hydroxyisobutyrate dehydrogenase	PA3312						PA3312	probable 3-hydroxyisobutyrate dehydrogenase [Pseudomonas aeruginosa PAO1]	1.05073	0.0242628	0.210536
9948697	Uncharacterized protein	PA2630						PA2630	conserved hypothetical protein [Pseudomonas aeruginosa PAO1]	1.03239	0.814357	0.912685
9950129	Acyl-CoA thioesterase II	tesB	PA3942					PA3942	acyl-CoA thioesterase II [Pseudomonas aeruginosa PAO1]	1.02433	0.352921	0.612682
9951196	Uncharacterized protein	PA4918						PA4918	hypothetical protein PA4918 [Pseudomonas aeruginosa PAO1]	1.01229	0.0910978	0.348029
9949575	Uncharacterized protein PA3435	PA3435						PA3435	conserved hypothetical protein [Pseudomonas aeruginosa PAO1]	1.01073	0.101452	0.364578
9948944	Esterase TesA (EC 3.1.1.1)	tesA	PA2856					PA2856	acyl-CoA thioesterase I precursor [Pseudomonas aeruginosa PAO1]	1.00451	0.159784	0.435622
9946697	Uncharacterized protein	PA0805						PA0805	hypothetical protein PA0805 [Pseudomonas aeruginosa PAO1]	1.00272	0.0756837	0.320451
9947471	Ureidoglycolate lyase (EC 4.3.2.3) (Ureidoglycolatase)	allA	PA1514					PA1514	ureidoglycolate hydrolaseYbbT [Pseudomonas aeruginosa PAO1]	0.98187	0.0223915	0.205706
9949281	Histidinol-phosphate aminotransferase 2 (EC 2.6.1.9) (Imidazole acetol-phosphate transaminase 2)	hisC2	PA3165					PA3165	histidinol-phosphate aminotransferase [Pseudomonas aeruginosa PAO1]	0.960439	0.104251	0.367917
9950252	Riboflavin synthase alpha chain	ribC	PA4055					PA4055	riboflavin synthase alpha chain [Pseudomonas aeruginosa PAO1]	0.952046	0.378044	0.634752
9951116	Thiol:disulfide interchange protein DsbD 1 (EC 1.8.1.8) (Protein-disulfide reductase 1) (Disulfide reductase 1)	dsbD1	dipZ	PA4845				PA4845	thiol:disulfide interchange protein DipZ [Pseudomonas aeruginosa PAO1]	0.950884	0.439956	0.681139
9946108	5-aminovalerate aminotransferase DavT (EC 2.6.1.48) (5-aminovalerate transaminase) (Delta-aminovalerate aminotransferase)	davT	PA0266					PA0266	4-aminobutyrate aminotransferase [Pseudomonas aeruginosa PAO1]	0.94474	0.020594	0.198563
9948592	Probable oxidoreductase	PA2535						PA2535	probable oxidoreductase [Pseudomonas aeruginosa PAO1]	0.938037	0.0245602	0.210536
9949302	HTH-type transcriptional regulator HexR (Hex regulon repressor)	hexR	PA3184					PA3184	probable transcriptional regulator [Pseudomonas aeruginosa PAO1]	0.937543	0.0796919	0.32635
9946847	Probable transcriptional regulator	PA0942						PA0942	probable transcriptional regulator [Pseudomonas aeruginosa PAO1]	0.92997	0.16314	0.438695
9947691	Type III secretion outer membrane protein PscC	pscC	PA1716					PA1716	Type III secretion outer membrane protein PscC precursor [Pseudomonas aeruginosa PAO1]	0.928513	0.198392	0.475911
9951296	UDP-glucose:(Heptosyl) LPS alpha 1,3-glucosyltransferase WaaG	waaG	PA5010					PA5010	UDP-glucose:(heptosyl) LPS alpha 1,3-glucosyltransferase WaaG [Pseudomonas aeruginosa PAO1]	0.926097	0.788991	0.902086
9948938	Elongation factor P (EF-P)	efp	PA2851					PA2851	translation elongation factor P [Pseudomonas aeruginosa PAO1]	0.924347	0.286888	0.556436
9946246	Pyrroline-5-carboxylate reductase (P5C reductase) (P5CR) (EC 1.5.1.2) (PCA reductase)	proC	PA0393					PA0393	pyrroline-5-carboxylate reductase [Pseudomonas aeruginosa PAO1]	0.922276	0.0137855	0.170486
9946200	Dihydrofolate reductase (EC 1.5.1.3)	folA	PA0350					PA0350	dihydrofolate reductase [Pseudomonas aeruginosa PAO1]	0.91391	0.373727	0.632069
9951860	Probable aminotransferase	PA5523						PA5523	probable aminotransferase [Pseudomonas aeruginosa PAO1]	0.91151	0.972102	0.988003
9950203	Putative 3-methyladenine DNA glycosylase (EC 3.2.2.-)	PA4010						PA4010	hypothetical protein PA4010 [Pseudomonas aeruginosa PAO1]	0.906371	0.0388599	0.245167
9949470	Uncharacterized protein	PA3338						PA3338	hypothetical protein PA3338 [Pseudomonas aeruginosa PAO1]	0.903701	0.749656	0.879558
9950210	Uncharacterized protein	PA4017						PA4017	conserved hypothetical protein [Pseudomonas aeruginosa PAO1]	0.88754	0.249314	0.521247
9948421	Uncharacterized protein	PA2381						PA2381	hypothetical protein PA2381 [Pseudomonas aeruginosa PAO1]	0.879106	0.00724873	0.134758
9950699	Uncharacterized protein	PA4463						PA4463	conserved hypothetical protein [Pseudomonas aeruginosa PAO1]	0.871262	0.0279257	0.218574
9951467	C4-dicarboxylate transport sensor protein DctB (EC 2.7.13.3)	dctB	PA5165					PA5165	probable two-component sensor [Pseudomonas aeruginosa PAO1]	0.86258	0.309047	0.574987
9947013	Uncharacterized protein	PA1096						PA1096	hypothetical protein PA1096 [Pseudomonas aeruginosa PAO1]	0.860979	0.246672	0.518626
9951488	Monofunctional chorismate mutase (EC 5.4.99.5)	aroQ	PA5184					PA5184	hypothetical protein PA5184 [Pseudomonas aeruginosa PAO1]	0.856018	0.767956	0.892295
9947094	Uncharacterized protein	PA1170						PA1170	conserved hypothetical protein [Pseudomonas aeruginosa PAO1]	0.851485	0.669399	0.829198
9950254	Transcriptional repressor NrdR	nrdR	PA4057					PA4057	NrdR [Pseudomonas aeruginosa PAO1]	0.84843	0.648949	0.815726
9949233	3-isopropylmalate dehydratase large subunit (EC 4.2.1.33) (Alpha-IPM isomerase) (IPMI) (Isopropylmalate isomerase)	leuC	PA3121					PA3121	3-isopropylmalate dehydratase large subunit [Pseudomonas aeruginosa PAO1]	0.84564	0.211139	0.49065
9945882	Osmotically inducible protein OsmC	osmC	PA0059					PA0059	osmotically inducible protein OsmC [Pseudomonas aeruginosa PAO1]	0.839953	0.93368	0.966002
9950928	Peptidyl-tRNA hydrolase (PTH) (EC 3.1.1.29)	pth	PA4672					PA4672	peptidyl-tRNA hydrolase [Pseudomonas aeruginosa PAO1]	0.838207	0.154627	0.433414
9948909	Probable sensor/response regulator hybrid	PA2824						PA2824	probable sensor/response regulator hybrid [Pseudomonas aeruginosa PAO1]	0.835495	0.241047	0.515279
9948456	Uncharacterized protein	PA2412						PA2412	conserved hypothetical protein [Pseudomonas aeruginosa PAO1]	0.823625	0.0382247	0.243258
9950974	Probable aminotransferase	PA4715						PA4715	probable aminotransferase [Pseudomonas aeruginosa PAO1]	0.822907	0.017762	0.190974
9947940	Uncharacterized protein	PA1943						PA1943	hypothetical protein PA1943 [Pseudomonas aeruginosa PAO1]	0.820177	0.594884	0.782028
9949268	O-antigen translocase	wzx	PA3153					PA3153	O-antigen translocase [Pseudomonas aeruginosa PAO1]	0.817041	0.0315401	0.230014
15599480	RecBCD enzyme subunit RecB (EC 3.1.11.5) (Exonuclease V subunit RecB) (Helicase/nuclease RecBCD subunit RecB)	recB	PA4284					PA4284	exodeoxyribonuclease V subunit beta [Pseudomonas aeruginosa PAO1]	0.816432	0.679028	0.834992
9947818	Probable protease	PA1832						PA1832	probable protease [Pseudomonas aeruginosa PAO1]	0.813142	0.0192421	0.196669
9949266	Putative imidazole glycerol phosphate synthase subunit hisF2 (EC 4.1.3.-) (IGP synthase cyclase subunit) (IGP synthase subunit hisF2) (ImGP synthase subunit hisF2) (IGPS subunit hisF2)	hisF2	PA3151					PA3151	imidazoleglycerol-phosphate synthase, cyclase subunit [Pseudomonas aeruginosa PAO1]	0.802579	0.131044	0.406482
9948264	PslI	pslI	PA2239					PA2239	PslI [Pseudomonas aeruginosa PAO1]	0.798206	0.263237	0.538564
9951512	Acetylornithine deacetylase (EC 3.5.1.16)	argE	PA5206					PA5206	acetylornithine deacetylase [Pseudomonas aeruginosa PAO1]	0.797732	0.115909	0.384354
9946396	Probable class III pyridoxal phosphate-dependent aminotransferase	PA0530						PA0530	probable class III pyridoxal phosphate-dependent aminotransferase [Pseudomonas aeruginosa PAO1]	0.794497	0.00826052	0.140567
9951558	Uncharacterized protein	PA5248						PA5248	hypothetical protein PA5248 [Pseudomonas aeruginosa PAO1]	0.793635	0.858089	0.931581
9951819	AmpDh2	ampDh2	PA5485					PA5485	AmpDh2 [Pseudomonas aeruginosa PAO1]	0.78645	0.096179	0.353112
9948637	Uncharacterized protein	PA2575						PA2575	hypothetical protein PA2575 [Pseudomonas aeruginosa PAO1]	0.785701	0.103184	0.367917
9949758	Uncharacterized protein	PA3602						PA3602	conserved hypothetical protein [Pseudomonas aeruginosa PAO1]	0.785528	0.0392809	0.245198
9946871	Transcriptional regulatory protein PmpR	pmpR	PA0964					PA0964	pqsR-mediated PQS regulator, PmpR [Pseudomonas aeruginosa PAO1]	0.779302	0.166477	0.44292
9947747	Uncharacterized protein	PA1768						PA1768	hypothetical protein PA1768 [Pseudomonas aeruginosa PAO1]	0.77468	0.0685287	0.305754
9950063	Probable short-chain dehydrogenase	PA3883						PA3883	probable short-chain dehydrogenase [Pseudomonas aeruginosa PAO1]	0.773867	0.00626686	0.122281
9947701	Periplasmic beta-glucosidase	bglX	PA1726					PA1726	periplasmic beta-glucosidase [Pseudomonas aeruginosa PAO1]	0.773112	0.790727	0.903071
62738792	L-methionine sulfoximine/L-methionine sulfone acetyltransferase (EC 2.3.1.-) (Methionine derivative detoxifier A) (MDDA)	pitA	PA4866					PA4866	Chain A, Hypothetical Acetyltransferase From P.Aeruginosa Pa01	0.772328	0.0116591	0.163852
9951005	Ribosome-binding factor A	rbfA	PA4743					PA4743	ribosome-binding factor A [Pseudomonas aeruginosa PAO1]	0.761089	0.0745736	0.318388
9949462	Cytochrome P450	PA3331						PA3331	cytochrome P450 [Pseudomonas aeruginosa PAO1]	0.758501	0.0153042	0.178259
9946448	DNA primase (EC 2.7.7.-)	dnaG	PA0577					PA0577	DNA primase [Pseudomonas aeruginosa PAO1]	0.757259	0.473238	0.707161
9949956	Uncharacterized protein	PA3784						PA3784	hypothetical protein PA3784 [Pseudomonas aeruginosa PAO1]	0.756831	0.0331963	0.23466
9949187	Uncharacterized protein	PA3079						PA3079	hypothetical protein PA3079 [Pseudomonas aeruginosa PAO1]	0.753691	0.406038	0.655716
9947151	Membrane-bound lytic murein transglycosylase A (EC 4.2.2.n1) (Murein hydrolase A)	PA1222						PA1222	probable membrane-bound lytic murein transglycolase A [Pseudomonas aeruginosa PAO1]	0.749907	0.434813	0.677172
9950755	Probable outer membrane receptor for iron transport	PA4514						PA4514	probable outer membrane receptor for iron transport [Pseudomonas aeruginosa PAO1]	0.747709	0.0307454	0.227555
9947019	Flagellar motor switch protein FliG	fliG	PA1102					PA1102	flagellar motor switch protein FliG [Pseudomonas aeruginosa PAO1]	0.74048	0.231976	0.509484
9949716	Fructose transport system repressor FruR	fruR	PA3563					PA3563	fructose transport system repressor FruR [Pseudomonas aeruginosa PAO1]	0.739214	0.698265	0.848047
9951503	Murein tetrapeptide carboxypeptidase (EC 3.4.17.13) (LD-carboxypeptidase)	PA5198						PA5198	LD-carboxypeptidase [Pseudomonas aeruginosa PAO1]	0.733806	0.0189571	0.196306
9950418	Probable Resistance-Nodulation-Cell Division (RND) efflux membrane fusion protein	mexH	PA4206					PA4206	probable Resistance-Nodulation-Cell Division (RND) efflux membrane fusion protein precursor [Pseudomonas aeruginosa PAO1]	0.725815	0.0267084	0.214459
9948862	Uncharacterized protein	PA2781						PA2781	hypothetical protein PA2781 [Pseudomonas aeruginosa PAO1]	0.711225	0.328332	0.592654
9947963	Probable ATP-binding component of ABC transporter	PA1964						PA1964	probable ATP-binding component of ABC transporter [Pseudomonas aeruginosa PAO1]	0.707414	0.0191785	0.196669
9949913	30S ribosomal protein S16	rpsP	PA3745					PA3745	30S ribosomal protein S16 [Pseudomonas aeruginosa PAO1]	0.705657	0.937091	0.967412
9951893	ATP synthase epsilon chain (ATP synthase F1 sector epsilon subunit) (F-ATPase epsilon subunit)	atpC	PA5553					PA5553	ATP synthase epsilon chain [Pseudomonas aeruginosa PAO1]	0.705273	0.0745543	0.318388
9950914	Probable transcriptional regulator	PA4659						PA4659	probable transcriptional regulator [Pseudomonas aeruginosa PAO1]	0.704365	0.264161	0.538662
9950460	Protein translocase subunit SecY	secY	PA4243					PA4243	secretion protein SecY [Pseudomonas aeruginosa PAO1]	0.70366	0.218947	0.496437
9950720	Glutamyl-tRNA(Gln) amidotransferase subunit C (Glu-ADT subunit C) (EC 6.3.5.-)	gatC	PA4482					PA4482	Glu-tRNA(Gln) amidotransferase subunit C [Pseudomonas aeruginosa PAO1]	0.702683	0.0426522	0.247588
9947269	Probable short-chain dehydrogenase	PA1330						PA1330	probable short-chain dehydrogenase [Pseudomonas aeruginosa PAO1]	0.699473	0.103784	0.367917
9951619	Uncharacterized protein	PA5303						PA5303	conserved hypothetical protein [Pseudomonas aeruginosa PAO1]	0.695803	0.315998	0.583323
9947681	Regulatory protein PcrH	pcrH	PA1707					PA1707	regulatory protein PcrH [Pseudomonas aeruginosa PAO1]	0.690762	0.224942	0.502504
9949290	Probable short-chain dehydrogenase	PA3173						PA3173	probable short-chain dehydrogenase [Pseudomonas aeruginosa PAO1]	0.684313	0.0316623	0.230014
9946876	Protein TolQ	tolQ	PA0969					PA0969	TolQ protein [Pseudomonas aeruginosa PAO1]	0.682696	0.275766	0.551382
9949035	Aminopeptidase (EC 3.4.11.1) (Leucine aminopeptidase) (PaAP) [Cleaved into: Aminopeptidase AP58; Aminopeptidase AP56; Aminopeptidase AP28]	lap	PA2939					PA2939	probable aminopeptidase [Pseudomonas aeruginosa PAO1]	0.676358	0.139393	0.414822
9951404	Uncharacterized protein	PA5108						PA5108	hypothetical protein PA5108 [Pseudomonas aeruginosa PAO1]	0.674186	0.138364	0.413253
9949980	Nucleoside diphosphate kinase (NDK) (NDP kinase) (EC 2.7.4.6) (Nucleoside-2-P kinase)	ndk	PA3807					PA3807	nucleoside diphosphate kinase [Pseudomonas aeruginosa PAO1]	0.671295	0.166907	0.44292
9946868	Probable cold-shock protein	PA0961						PA0961	probable cold-shock protein [Pseudomonas aeruginosa PAO1]	0.670137	0.0540668	0.273931
15598183	Lipoprotein-releasing system ATP-binding protein LolD (EC 3.6.3.-)	lolD	PA2987					PA2987	ATP-binding component of ABC transporter [Pseudomonas aeruginosa PAO1]	0.667637	0.0732984	0.315798
9949416	Uncharacterized protein	PA3289						PA3289	hypothetical protein PA3289 [Pseudomonas aeruginosa PAO1]	0.664004	0.437875	0.679887
9951369	Probable binding protein component of ABC transporter	PA5076						PA5076	probable binding protein component of ABC transporter [Pseudomonas aeruginosa PAO1]	0.661735	0.887258	0.944578
9951868	Probable MFS dicarboxylate transporter	PA5530						PA5530	probable MFS dicarboxylate transporter [Pseudomonas aeruginosa PAO1]	0.656193	0.29028	0.558576
9947690	Type III export apparatus protein	pscB	PA1715					PA1715	type III export apparatus protein [Pseudomonas aeruginosa PAO1]	0.648215	0.128044	0.403454
9950197	Ribosomal silencing factor RsfS	rsfS	PA4005					PA4005	conserved hypothetical protein [Pseudomonas aeruginosa PAO1]	0.64678	0.386803	0.640423
9947539	Probable 3-hydroxyisobutyrate dehydrogenase	PA1576						PA1576	probable 3-hydroxyisobutyrate dehydrogenase [Pseudomonas aeruginosa PAO1]	0.644703	0.945691	0.97313
9951599	Uncharacterized protein	PA5285						PA5285	hypothetical protein PA5285 [Pseudomonas aeruginosa PAO1]	0.636315	0.311301	0.576909
9949948	Exodeoxyribonuclease 7 large subunit (EC 3.1.11.6) (Exodeoxyribonuclease VII large subunit) (Exonuclease VII large subunit)	xseA	PA3777					PA3777	exodeoxyribonuclease VII large subunit [Pseudomonas aeruginosa PAO1]	0.635952	0.475529	0.707897
9951028	Ferric uptake regulation protein (Ferric uptake regulator)	fur	PA4764					PA4764	ferric uptake regulation protein [Pseudomonas aeruginosa PAO1]	0.63571	0.181962	0.460975
9951323	Uroporphyrinogen decarboxylase (UPD) (URO-D) (EC 4.1.1.37)	hemE	PA5034					PA5034	uroporphyrinogen decarboxylase [Pseudomonas aeruginosa PAO1]	0.635393	0.130973	0.406482
9950674	Uncharacterized protein	PA4440						PA4440	hypothetical protein PA4440 [Pseudomonas aeruginosa PAO1]	0.634269	0.471702	0.705313
9947227	Probable 3-mercaptopyruvate sulfurtransferase (MST) (EC 2.8.1.2) (Rhodanese-like protein)	sseA	PA1292					PA1292	probable 3-mercaptopyruvate sulfurtransferase [Pseudomonas aeruginosa PAO1]	0.630516	0.375473	0.633208
9951183	Probable short-chain dehydrogenase	PA4907						PA4907	probable short-chain dehydrogenase [Pseudomonas aeruginosa PAO1]	0.629077	0.10752	0.371678
15595289	VgrG1	vgrG1	PA0091					PA0091	VgrG1 [Pseudomonas aeruginosa PAO1]	0.628898	0.280396	0.553016
15596871	GTP cyclohydrolase 1 2 (EC 3.5.4.16) (GTP cyclohydrolase I 2) (GTP-CH-I 2)	folE2	PA1674					PA1674	GTP cyclohydrolase I [Pseudomonas aeruginosa PAO1]	0.625247	0.410945	0.659606
9950967	Probable hemin degrading factor	PA4709						PA4709	probable hemin degrading factor [Pseudomonas aeruginosa PAO1]	0.622225	0.0863063	0.339742
9951904	Chromosome partitioning protein Soj	soj	PA5563					PA5563	chromosome partitioning protein Soj [Pseudomonas aeruginosa PAO1]	0.620342	0.378539	0.634752
9947835	Fe/S biogenesis protein NfuA	nfuA	PA1847					PA1847	conserved hypothetical protein [Pseudomonas aeruginosa PAO1]	0.618077	0.482695	0.711088
9951834	Transcriptional regulator np20	np20	PA5499					PA5499	transcriptional regulator np20 [Pseudomonas aeruginosa PAO1]	0.617871	0.362747	0.621513
9948739	Uncharacterized protein	PA2668						PA2668	hypothetical protein PA2668 [Pseudomonas aeruginosa PAO1]	0.614252	0.410521	0.659606
9950468	50S ribosomal protein L5	rplE	PA4251					PA4251	50S ribosomal protein L5 [Pseudomonas aeruginosa PAO1]	0.613121	0.155085	0.433414
9947256	Cytochrome bo(3) ubiquinol oxidase subunit 1 (EC 1.10.3.10) (Cytochrome o ubiquinol oxidase subunit 1) (Cytochrome o subunit 1) (Oxidase bo(3) subunit 1) (Ubiquinol oxidase polypeptide I) (Ubiquinol oxidase subunit 1)	cyoB	PA1318					PA1318	cytochrome o ubiquinol oxidase subunit I [Pseudomonas aeruginosa PAO1]	0.610098	0.470666	0.704656
9947317	3-oxoacyl-[acyl-carrier-protein] synthase 2 (EC 2.3.1.179)	fabF2	PA1373					PA1373	3-oxoacyl-acyl carrier protein synthase II [Pseudomonas aeruginosa PAO1]	0.608838	0.281456	0.553097
9950083	Fe(III) dicitrate transport protein FecA	fecA	PA3901					PA3901	Fe(III) dicitrate transport protein FecA [Pseudomonas aeruginosa PAO1]	0.604771	0.00903909	0.145135
9950436	Fe(3+)-pyochelin receptor (Fe(III)-pyochelin receptor)	fptA	PA4221					PA4221	Fe(III)-pyochelin outer membrane receptor precursor [Pseudomonas aeruginosa PAO1]	0.596724	0.0433207	0.248253
9950698	RNA polymerase sigma-54 factor	rpoN	PA4462					PA4462	RNA polymerase sigma-54 factor [Pseudomonas aeruginosa PAO1]	0.590407	0.235964	0.51158
9949042	Protein CobW	cobW	PA2945					PA2945	conserved hypothetical protein [Pseudomonas aeruginosa PAO1]	0.58465	0.0604122	0.29101
9949977	Uncharacterized protein	PA3804						PA3804	hypothetical protein PA3804 [Pseudomonas aeruginosa PAO1]	0.584632	0.15908	0.4356
9946233	Thiazole synthase (EC 2.8.1.10)	thiG	PA0381					PA0381	thiamine biosynthesis protein, thiazole moiety [Pseudomonas aeruginosa PAO1]	0.578653	0.0346175	0.237592
9946440	Uncharacterized protein	PA0570						PA0570	hypothetical protein PA0570 [Pseudomonas aeruginosa PAO1]	0.578567	0.428762	0.673292
9946403	Uncharacterized protein	PA0536						PA0536	hypothetical protein PA0536 [Pseudomonas aeruginosa PAO1]	0.57267	0.356262	0.614865
15595944	Probable aldehyde dehydrogenase	PA0747						PA0747	aldehyde dehydrogenase [Pseudomonas aeruginosa PAO1]	0.56969	0.532795	0.744337
9948527	Thiol:disulfide interchange protein DsbG	dsbG	PA2476					PA2476	thiol:disulfide interchange protein DsbG [Pseudomonas aeruginosa PAO1]	0.569512	0.504013	0.724331
9950356	Probable dehydrogenase E1 component	PA4150						PA4150	probable dehydrogenase E1 component [Pseudomonas aeruginosa PAO1]	0.56774	0.503384	0.724331
9949089	Uncharacterized protein	PA2989						PA2989	hypothetical protein PA2989 [Pseudomonas aeruginosa PAO1]	0.565644	0.266336	0.542554
9950733	RoxS	roxS	PA4494					PA4494	RoxS [Pseudomonas aeruginosa PAO1]	0.561947	0.852258	0.929782
9947428	Cytochrome c biogenesis ATP-binding export protein CcmA (EC 3.6.3.41) (Heme exporter protein A)	ccmA	PA1475					PA1475	heme exporter protein CcmA [Pseudomonas aeruginosa PAO1]	0.561061	0.0138237	0.170486
9950463	30S ribosomal protein S5	rpsE	PA4246					PA4246	30S ribosomal protein S5 [Pseudomonas aeruginosa PAO1]	0.557634	0.283977	0.554108
9949297	Ribosomal large subunit pseudouridine synthase B (EC 5.4.99.22) (23S rRNA pseudouridine(2605) synthase) (rRNA pseudouridylate synthase B) (rRNA-uridine isomerase B)	rluB	PA3179					PA3179	conserved hypothetical protein [Pseudomonas aeruginosa PAO1]	0.556807	0.241316	0.515279
15600406	Glycine dehydrogenase (decarboxylating) 2 (EC 1.4.4.2) (Glycine cleavage system P-protein 2) (Glycine decarboxylase 2) (Glycine dehydrogenase (aminomethyl-transferring) 2)	gcvP2	PA5213					PA5213	glycine dehydrogenase [Pseudomonas aeruginosa PAO1]	0.556649	0.402652	0.652904
9951235	Chemotaxis protein MotA	motA	PA4954					PA4954	chemotaxis protein MotA [Pseudomonas aeruginosa PAO1]	0.552125	0.369689	0.628753
9948845	Uncharacterized protein	PA2765						PA2765	hypothetical protein PA2765 [Pseudomonas aeruginosa PAO1]	0.551879	0.499669	0.723436
9951481	Uncharacterized protein	PA5178						PA5178	conserved hypothetical protein [Pseudomonas aeruginosa PAO1]	0.543186	0.369957	0.628753
9947255	Cytochrome bo(3) ubiquinol oxidase subunit 2 (Cytochrome o ubiquinol oxidase subunit 2) (Cytochrome o subunit 2) (Oxidase bo(3) subunit 2) (Ubiquinol oxidase polypeptide II) (Ubiquinol oxidase subunit 2)	cyoA	PA1317					PA1317	cytochrome o ubiquinol oxidase subunit II [Pseudomonas aeruginosa PAO1]	0.538916	0.0407119	0.246774
9951685	Probable two-component response regulator	PA5364						PA5364	probable two-component response regulator [Pseudomonas aeruginosa PAO1]	0.5366	0.779218	0.896993
9947584	Putative esterase PA1618 (EC 3.1.2.-)	PA1618						PA1618	conserved hypothetical protein [Pseudomonas aeruginosa PAO1]	0.535407	0.132599	0.407109
9948454	Uncharacterized protein	PA2410						PA2410	hypothetical protein PA2410 [Pseudomonas aeruginosa PAO1]	0.53297	0.309627	0.575613
9951110	Uncharacterized protein	PA4840						PA4840	conserved hypothetical protein [Pseudomonas aeruginosa PAO1]	0.526882	0.640996	0.810883
9946257	Bifunctional protein PyrR [Includes: Pyrimidine operon regulatory protein; Uracil phosphoribosyltransferase (UPRTase) (EC 2.4.2.9)]	pyrR	PA0403					PA0403	transcriptional regulator PyrR [Pseudomonas aeruginosa PAO1]	0.526135	0.349665	0.611073
9946431	Probable hydrolase	PA0562						PA0562	probable hydrolase [Pseudomonas aeruginosa PAO1]	0.524387	0.21192	0.49074
9945955	Uncharacterized protein	PA0127						PA0127	hypothetical protein PA0127 [Pseudomonas aeruginosa PAO1]	0.521324	0.214201	0.492912
9950449	Probable major facilitator superfamily (MFS) transporter	PA4233						PA4233	probable major facilitator superfamily (MFS) transporter [Pseudomonas aeruginosa PAO1]	0.518168	0.49785	0.722004
9947087	Uncharacterized protein	PA1164						PA1164	conserved hypothetical protein [Pseudomonas aeruginosa PAO1]	0.518043	0.228381	0.506298
9951056	Uncharacterized protein	PA4790						PA4790	conserved hypothetical protein [Pseudomonas aeruginosa PAO1]	0.516008	0.470031	0.704656
9949111	Uncharacterized protein	PA3009						PA3009	hypothetical protein PA3009 [Pseudomonas aeruginosa PAO1]	0.513953	0.691248	0.84343
9949273	UDP-N-acetyl-2-amino-2-deoxy-D-glucuronate oxidase (EC 1.1.1.335) (UDP-2-acetamido-2-deoxy-alpha-D-glucuronic acid 3-dehydrogenase) (UDP-N-acetyl-D-glucosaminuronic acid 3-oxidase) (UDP-D-GlcNAcA 3-oxidase)	wbpB	wlbA	PA3158				PA3158	UDP-2-acetamido-2-deoxy-d-glucuronic acid 3-dehydrogenase, WbpB [Pseudomonas aeruginosa PAO1]	0.513654	0.212784	0.491568
9949463	Uncharacterized PhzA/B-like protein PA3332	PA3332						PA3332	conserved hypothetical protein [Pseudomonas aeruginosa PAO1]	0.51152	0.127152	0.40242
9946938	Uncharacterized protein	PA1026						PA1026	hypothetical protein PA1026 [Pseudomonas aeruginosa PAO1]	0.51122	0.210625	0.490156
9947590	Uncharacterized protein	PA1623						PA1623	conserved hypothetical protein [Pseudomonas aeruginosa PAO1]	0.510171	0.251326	0.523438
9950437	Probable ATP-binding component of ABC transporter	PA4222						PA4222	probable ATP-binding component of ABC transporter [Pseudomonas aeruginosa PAO1]	0.508075	0.369821	0.628753
9951898	ATP synthase subunit b (ATP synthase F(0) sector subunit b) (ATPase subunit I) (F-type ATPase subunit b) (F-ATPase subunit b)	atpF	PA5558					PA5558	ATP synthase B chain [Pseudomonas aeruginosa PAO1]	0.506195	0.477798	0.709404
9950801	Type 4 fimbrial biogenesis protein PilE	pilE	PA4556					PA4556	type 4 fimbrial biogenesis protein PilE [Pseudomonas aeruginosa PAO1]	0.505433	0.822696	0.91882
9947223	Probable outer membrane protein	PA1288						PA1288	probable outer membrane protein precursor [Pseudomonas aeruginosa PAO1]	0.503597	0.584733	0.774288
9949086	Uncharacterized protein	PA2986						PA2986	conserved hypothetical protein [Pseudomonas aeruginosa PAO1]	0.502887	0.212009	0.49074
9950263	Uncharacterized protein	PA4066						PA4066	hypothetical protein PA4066 [Pseudomonas aeruginosa PAO1]	0.500458	0.846681	0.928809
9948256	PslA	pslA	PA2231					PA2231	PslA [Pseudomonas aeruginosa PAO1]	0.497466	0.0842856	0.336762
9950039	ATP-dependent RNA helicase RhlB (EC 3.6.4.13)	rhlB	rhl	PA3861				PA3861	ATP-dependent RNA helicase RhlB [Pseudomonas aeruginosa PAO1]	0.496552	0.319778	0.586886
9950709	PmbA protein	pmbA	PA4472					PA4472	PmbA protein [Pseudomonas aeruginosa PAO1]	0.495991	0.600643	0.785661
9947727	Uncharacterized protein	PA1749						PA1749	hypothetical protein PA1749 [Pseudomonas aeruginosa PAO1]	0.493503	0.181521	0.460975
9948696	Adenylosuccinate lyase (ASL) (EC 4.3.2.2) (Adenylosuccinase) (ASase)	purB	PA2629					PA2629	adenylosuccinate lyase [Pseudomonas aeruginosa PAO1]	0.487911	0.903161	0.948689
9946532	2-nonaprenyl-3-methyl-6-methoxy-1,4-benzoquinol hydroxylase (EC 1.14.13.-) (5-demethoxyubiquinone hydroxylase) (DMQ hydroxylase)	coq7	PA0655					PA0655	hypothetical protein PA0655 [Pseudomonas aeruginosa PAO1]	0.485668	0.666911	0.827853
9946923	Phosphoribosylaminoimidazole-succinocarboxamide synthase (EC 6.3.2.6) (SAICAR synthetase)	purC	PA1013					PA1013	phosphoribosylaminoimidazole-succinocarboxamide synthase [Pseudomonas aeruginosa PAO1]	0.485645	0.126653	0.40242
9949867	Chemotaxis response regulator protein-glutamate methylesterase of group 3 operon (EC 3.1.1.61)	cheB3	PA3703					PA3703	probable methylesterase [Pseudomonas aeruginosa PAO1]	0.485593	0.799448	0.906301
9946588	Alpha-1,6-rhamnosyltransferase MigA	migA	PA0705					PA0705	alpha-1,6-rhamnosyltransferase MigA [Pseudomonas aeruginosa PAO1]	0.482399	0.950454	0.976511
9949147	Uncharacterized protein	PA3042						PA3042	hypothetical protein PA3042 [Pseudomonas aeruginosa PAO1]	0.481217	0.0686141	0.305754
9951145	Oxaloacetate decarboxylase (EC 4.1.1.3)	PA4872						PA4872	hypothetical protein PA4872 [Pseudomonas aeruginosa PAO1]	0.48088	0.241258	0.515279
9947018	Flagellar M-ring protein	fliF	PA1101					PA1101	Flagella M-ring outer membrane protein precursor [Pseudomonas aeruginosa PAO1]	0.479961	0.940025	0.968831
9951259	Arginine--pyruvate transaminase AruH (EC 2.6.1.84)	aruH	PA4976					PA4976	Arginine:Pyruvate Transaminase, AruH [Pseudomonas aeruginosa PAO1]	0.474606	0.673887	0.831842
9947417	Probable purine-binding chemotaxis protein	PA1464						PA1464	probable purine-binding chemotaxis protein [Pseudomonas aeruginosa PAO1]	0.47452	0.255286	0.526403
9949122	Probable ATP-binding component of ABC transporter	PA3019						PA3019	probable ATP-binding component of ABC transporter [Pseudomonas aeruginosa PAO1]	0.472976	0.34202	0.603892
9950179	LPS-assembly lipoprotein LptE	lptE	PA3988					PA3988	hypothetical protein PA3988 [Pseudomonas aeruginosa PAO1]	0.468511	0.202657	0.480987
9951767	Probable transcriptional regulator	PA5438						PA5438	probable transcriptional regulator [Pseudomonas aeruginosa PAO1]	0.466435	0.880732	0.938785
9946212	Probable gamma-glutamyltranspeptidase	PA0361						PA0361	probable gamma-glutamyltranspeptidase precursor [Pseudomonas aeruginosa PAO1]	0.465573	0.478044	0.709404
9950490	50S ribosomal protein L7/L12	rplL	PA4271					PA4271	50S ribosomal protein L7 / L12 [Pseudomonas aeruginosa PAO1]	0.46155	0.389906	0.642407
9950713	Uncharacterized protein	PA4476						PA4476	hypothetical protein PA4476 [Pseudomonas aeruginosa PAO1]	0.461373	0.868402	0.935728
9948913	Probable aminotransferase	PA2828						PA2828	probable aminotransferase [Pseudomonas aeruginosa PAO1]	0.455055	0.533515	0.744902
9951010	Triosephosphate isomerase (TIM) (TPI) (EC 5.3.1.1) (Triose-phosphate isomerase)	tpiA	PA4748					PA4748	triosephosphate isomerase [Pseudomonas aeruginosa PAO1]	0.454879	0.267525	0.543826
9949465	Probable acyl carrier protein	PA3334						PA3334	probable acyl carrier protein [Pseudomonas aeruginosa PAO1]	0.45327	0.488292	0.714948
9951762	Uncharacterized protein	PA5433						PA5433	conserved hypothetical protein [Pseudomonas aeruginosa PAO1]	0.450439	0.156721	0.433414
9948633	Probable two-component response regulator	PA2572						PA2572	probable two-component response regulator [Pseudomonas aeruginosa PAO1]	0.449689	0.52459	0.738556
9946141	Probable glutamine amidotransferase	spuA	PA0297					PA0297	probable glutamine amidotransferase [Pseudomonas aeruginosa PAO1]	0.449335	0.961615	0.98242
9951201	Putative cytokinin riboside 5'-monophosphate phosphoribohydrolase (EC 3.2.2.n1)	PA4923						PA4923	conserved hypothetical protein [Pseudomonas aeruginosa PAO1]	0.448844	0.326877	0.59137
9951682	Phosphate regulon sensor protein PhoR (EC 2.7.13.3)	phoR	PA5361					PA5361	two-component sensor PhoR [Pseudomonas aeruginosa PAO1]	0.447552	0.298852	0.565052
9948005	3-hydroxybutyrate dehydrogenase	bdhA	PA2003					PA2003	3-hydroxybutyrate dehydrogenase [Pseudomonas aeruginosa PAO1]	0.447551	0.29791	0.564564
9949521	Alginate and motility regulator Z	amrZ	PA3385					PA3385	alginate and motility regulator Z [Pseudomonas aeruginosa PAO1]	0.445472	0.746492	0.877723
9946941	Uncharacterized protein	PA1029						PA1029	hypothetical protein PA1029 [Pseudomonas aeruginosa PAO1]	0.444829	0.297944	0.564564
9945856	Tryptophan synthase alpha chain (EC 4.2.1.20)	trpA	PA0035					PA0035	tryptophan synthase alpha chain [Pseudomonas aeruginosa PAO1]	0.443243	0.641219	0.810883
9951305	Peptide methionine sulfoxide reductase MsrA (Protein-methionine-S-oxide reductase) (EC 1.8.4.11) (Peptide-methionine (S)-S-oxide reductase) (Peptide Met(O) reductase)	msrA	PA5018					PA5018	peptide methionine sulfoxide reductase [Pseudomonas aeruginosa PAO1]	0.439762	0.261001	0.535381
9951316	Uncharacterized protein	PA5027						PA5027	hypothetical protein PA5027 [Pseudomonas aeruginosa PAO1]	0.437939	0.768487	0.892425
9950809	30S ribosomal protein S20	rpsT	PA4563					PA4563	30S ribosomal protein S20 [Pseudomonas aeruginosa PAO1]	0.436559	0.481613	0.711088
9946331	Ferrichrome receptor FiuA	fiuA	PA0470					PA0470	Ferrichrome receptor FiuA [Pseudomonas aeruginosa PAO1]	0.43626	0.341601	0.603892
9950470	50S ribosomal protein L14	rplN	PA4253					PA4253	50S ribosomal protein L14 [Pseudomonas aeruginosa PAO1]	0.436024	0.0304192	0.227374
9949260	Probable NAD-dependent epimerase/dehydratase WbpK	wbpK	PA3146					PA3146	probable NAD-dependent epimerase/dehydratase WbpK [Pseudomonas aeruginosa PAO1]	0.432995	0.618787	0.797901
9946802	Succinylglutamate desuccinylase (EC 3.5.1.96)	astE	aruE	PA0901				PA0901	succinylglutamate desuccinylase [Pseudomonas aeruginosa PAO1]	0.431434	0.268839	0.545299
9950917	Glutamate racemase (EC 5.1.1.3)	murI	PA4662					PA4662	glutamate racemase [Pseudomonas aeruginosa PAO1]	0.431308	0.557415	0.761181
9951357	Probable protein kinase UbiB (EC 2.7.-.-) (Ubiquinone biosynthesis protein UbiB)	ubiB	PA5065					PA5065	ubiquinone biosynthetic protein UbiB [Pseudomonas aeruginosa PAO1]	0.429172	0.0610365	0.291771
9949941	Inosine-5'-monophosphate dehydrogenase (IMP dehydrogenase) (IMPD) (IMPDH) (EC 1.1.1.205)	guaB	PA3770					PA3770	inosine-5'-monophosphate dehydrogenase [Pseudomonas aeruginosa PAO1]	0.428616	0.0284481	0.219496
9946852	Uncharacterized protein	PA0946						PA0946	hypothetical protein PA0946 [Pseudomonas aeruginosa PAO1]	0.426167	0.088847	0.345757
9947427	Uncharacterized protein	PA1474						PA1474	hypothetical protein PA1474 [Pseudomonas aeruginosa PAO1]	0.425185	0.296931	0.563549
9950810	Uncharacterized protein	PA4564						PA4564	conserved hypothetical protein [Pseudomonas aeruginosa PAO1]	0.42484	0.880019	0.938785
9947491	Nucleoid-associated protein PA1533	PA1533						PA1533	conserved hypothetical protein [Pseudomonas aeruginosa PAO1]	0.424003	0.225616	0.503478
9950205	Uncharacterized protein	PA4012						PA4012	hypothetical protein PA4012 [Pseudomonas aeruginosa PAO1]	0.422334	0.0448635	0.252799
9948702	Isocitrate lyase (ICL) (EC 4.1.3.1) (Isocitrase) (Isocitratase)	PA2634						PA2634	isocitrate lyase [Pseudomonas aeruginosa PAO1]	0.420253	0.219097	0.496437
9948431	Macrolide export ATP-binding/permease protein MacB (EC 3.6.3.-)	macB	PA2390					PA2390	PvdT [Pseudomonas aeruginosa PAO1]	0.419532	0.561725	0.761765
15596046	Thioredoxin reductase (EC 1.8.1.9)	trxB2	PA0849					PA0849	thioredoxin reductase 2 [Pseudomonas aeruginosa PAO1]	0.418894	0.379495	0.635904
9948649	Response regulator GacA (Global activator)	gacA	PA2586					PA2586	response regulator GacA [Pseudomonas aeruginosa PAO1]	0.41393	0.259337	0.532893
9949795	2-dehydro-3-deoxyphosphooctonate aldolase (EC 2.5.1.55) (3-deoxy-D-manno-octulosonic acid 8-phosphate synthase) (KDO-8-phosphate synthase) (KDO 8-P synthase) (KDOPS) (Phospho-2-dehydro-3-deoxyoctonate aldolase)	kdsA	PA3636					PA3636	2-dehydro-3-deoxyphosphooctonate aldolase [Pseudomonas aeruginosa PAO1]	0.413607	0.0877445	0.342988
9951687	Phosphate import ATP-binding protein PstB (EC 3.6.3.27) (ABC phosphate transporter) (Phosphate-transporting ATPase)	pstB	PA5366					PA5366	ATP-binding component of ABC phosphate transporter [Pseudomonas aeruginosa PAO1]	0.410664	0.610638	0.790414
9949458	Probable non-ribosomal peptide synthetase	PA3327						PA3327	probable non-ribosomal peptide synthetase [Pseudomonas aeruginosa PAO1]	0.410068	0.0242268	0.210536
9948455	Probable thioesterase	PA2411						PA2411	probable thioesterase [Pseudomonas aeruginosa PAO1]	0.407183	0.905748	0.949587
9951516	Uncharacterized protein	PA5209						PA5209	hypothetical protein PA5209 [Pseudomonas aeruginosa PAO1]	0.404773	0.231139	0.509484
9949473	Probable transcriptional regulator	PA3341						PA3341	probable transcriptional regulator [Pseudomonas aeruginosa PAO1]	0.403666	0.210719	0.490156
9947749	Phosphoenolpyruvate synthase (PEP synthase) (EC 2.7.9.2) (Pyruvate, water dikinase)	ppsA	PA1770					PA1770	phosphoenolpyruvate synthase [Pseudomonas aeruginosa PAO1]	0.40355	0.0847253	0.336762
9950471	30S ribosomal protein S17	rpsQ	PA4254					PA4254	30S ribosomal protein S17 [Pseudomonas aeruginosa PAO1]	0.403053	0.446076	0.687011
9949271	UDP-2-acetamido-3-amino-2,3-dideoxy-D-glucuronate N-acetyltransferase (UDP-D-GlcNAc3NA N-acetyltransferase) (EC 2.3.1.201) (UDP-2-acetamido-3-amino-2,3-dideoxy-alpha-D-glucuronic acid 3-N-acetyltransferase)	wbpD	PA3156					PA3156	UDP-2-acetamido-3-amino-2,3-dideoxy-d-glucuronic acid N-acetyltransferase, WbpD [Pseudomonas aeruginosa PAO1]	0.402672	0.0706142	0.311308
9950102	Cyclic pyranopterin monophosphate synthase accessory protein (Molybdenum cofactor biosynthesis protein C)	moaC	PA3918					PA3918	molybdopterin biosynthetic protein C [Pseudomonas aeruginosa PAO1]	0.401504	0.703546	0.851108
9950879	Glycerate dehydrogenase	hprA	PA4626					PA4626	glycerate dehydrogenase [Pseudomonas aeruginosa PAO1]	0.400444	0.709877	0.853705
9949283	Phosphoserine aminotransferase (EC 2.6.1.52) (Phosphohydroxythreonine aminotransferase) (PSAT)	serC	PA3167					PA3167	3-phosphoserine aminotransferase [Pseudomonas aeruginosa PAO1]	0.399548	0.320943	0.587857
9951498	33 kDa chaperonin (Heat shock protein 33 homolog) (HSP33)	hslO	PA5193					PA5193	heat shock protein HSP33 [Pseudomonas aeruginosa PAO1]	0.396811	0.0559326	0.27743
9946671	Uncharacterized protein	PA0781						PA0781	hypothetical protein PA0781 [Pseudomonas aeruginosa PAO1]	0.390836	0.995211	0.997746
15599798	Serine hydroxymethyltransferase 3 (SHMT 3) (Serine methylase 3) (EC 2.1.2.1)	glyA2	PA4602					PA4602	serine hydroxymethyltransferase [Pseudomonas aeruginosa PAO1]	0.38772	0.116836	0.384726
9946187	Uncharacterized protein	PA0339						PA0339	hypothetical protein PA0339 [Pseudomonas aeruginosa PAO1]	0.386804	0.246368	0.518626
9950756	PKHD-type hydroxylase PiuC (EC 1.14.11.-) (Iron-uptake factor PiuC)	piuC	PA4515					PA4515	conserved hypothetical protein [Pseudomonas aeruginosa PAO1]	0.385274	0.393224	0.645621
9949581	Uncharacterized protein	PA3440						PA3440	conserved hypothetical protein [Pseudomonas aeruginosa PAO1]	0.383539	0.45524	0.694557
9951637	Phosphopantothenoylcysteine synthase/(R)-4'-phospho-N-pantothenoylcysteine decarboxylase	coaC	PA5320					PA5320	Phosphopantothenoylcysteine synthase/(R)-4'-phospho-N-pantothenoylcysteine decarboxylase [Pseudomonas aeruginosa PAO1]	0.382373	0.130833	0.406482
9948759	Sensor protein PfeS (EC 2.7.13.3)	pfeS	PA2687					PA2687	two-component sensor PfeS [Pseudomonas aeruginosa PAO1]	0.381762	0.631175	0.805951
9946920	4-hydroxy-tetrahydrodipicolinate synthase (HTPA synthase) (EC 4.3.3.7)	dapA	PA1010					PA1010	dihydrodipicolinate synthase [Pseudomonas aeruginosa PAO1]	0.380955	0.579886	0.77133
9951012	Dihydropteroate synthase (DHPS) (EC 2.5.1.15) (Dihydropteroate pyrophosphorylase)	folP	PA4750					PA4750	dihydropteroate synthase [Pseudomonas aeruginosa PAO1]	0.380571	0.53924	0.749792
9951209	Alanine racemase, biosynthetic (EC 5.1.1.1)	alr	PA4930					PA4930	biosynthetic alanine racemase [Pseudomonas aeruginosa PAO1]	0.38033	0.326272	0.59137
9946163	Uncharacterized protein	PA0317						PA0317	hypothetical protein PA0317 [Pseudomonas aeruginosa PAO1]	0.378355	0.0510619	0.268502
9950438	Probable ATP-binding component of ABC transporter	PA4223						PA4223	probable ATP-binding component of ABC transporter [Pseudomonas aeruginosa PAO1]	0.378254	0.785666	0.900386
9948773	Uncharacterized protein	PA2699						PA2699	hypothetical protein PA2699 [Pseudomonas aeruginosa PAO1]	0.377279	0.282702	0.554108
9951443	Imidazoleglycerol-phosphate dehydratase (IGPD) (EC 4.2.1.19)	hisB	PA5143					PA5143	imidazoleglycerol-phosphate dehydratase [Pseudomonas aeruginosa PAO1]	0.376805	0.142932	0.418687
9951406	Fructose-1,6-bisphosphatase class 1 (FBPase class 1) (EC 3.1.3.11) (D-fructose-1,6-bisphosphate 1-phosphohydrolase class 1)	fbp	PA5110					PA5110	fructose-1,6-bisphosphatase [Pseudomonas aeruginosa PAO1]	0.376626	0.0688949	0.305754
9951242	Probable phosphoserine phosphatase	PA4960						PA4960	probable phosphoserine phosphatase [Pseudomonas aeruginosa PAO1]	0.37517	0.190763	0.469285
9948502	Uncharacterized protein	PA2453						PA2453	hypothetical protein PA2453 [Pseudomonas aeruginosa PAO1]	0.372479	0.296622	0.563415
9950320	Bacteriophytochrome (EC 2.7.13.3) (Phytochrome-like protein)	bphP	PA4117					PA4117	bacterial phytochrome, BphP [Pseudomonas aeruginosa PAO1]	0.369682	0.63067	0.805742
9949459	Probable FAD-dependent monooxygenase	PA3328						PA3328	probable FAD-dependent monooxygenase [Pseudomonas aeruginosa PAO1]	0.368851	0.333075	0.597368
9950492	50S ribosomal protein L1	rplA	PA4273					PA4273	50S ribosomal protein L1 [Pseudomonas aeruginosa PAO1]	0.368585	0.212382	0.491121
9946992	Uncharacterized protein	PA1076						PA1076	hypothetical protein PA1076 [Pseudomonas aeruginosa PAO1]	0.367234	0.502677	0.724331
9950006	Cytosol aminopeptidase (EC 3.4.11.1) (Leucine aminopeptidase) (LAP) (EC 3.4.11.10) (Leucyl aminopeptidase)	pepA	phpA	PA3831				PA3831	leucine aminopeptidase [Pseudomonas aeruginosa PAO1]	0.363585	0.247122	0.518626
9948221	Probable dehydrogenase	PA2199						PA2199	probable dehydrogenase [Pseudomonas aeruginosa PAO1]	0.36275	0.322789	0.588975
9949467	Uncharacterized protein	PA3335						PA3335	hypothetical protein PA3335 [Pseudomonas aeruginosa PAO1]	0.362265	0.170605	0.449413
9946419	D-erythrose-4-phosphate dehydrogenase (EC 1.2.1.72)	epd	PA0551					PA0551	D-erythrose 4-phosphate dehydrogenase [Pseudomonas aeruginosa PAO1]	0.357019	0.861811	0.934222
9947709	Uncharacterized protein	PA1733						PA1733	conserved hypothetical protein [Pseudomonas aeruginosa PAO1]	0.354899	0.971985	0.988003
15596805	Probable chemotaxis transducer	PA1608						PA1608	chemotaxis transducer [Pseudomonas aeruginosa PAO1]	0.354849	0.113901	0.382371
9950895	Uncharacterized protein	PA4642						PA4642	hypothetical protein PA4642 [Pseudomonas aeruginosa PAO1]	0.353886	0.680939	0.836036
9948755	Probable serine/threonine dehydratase, degradative	PA2683						PA2683	probable serine/threonine dehydratase, degradative [Pseudomonas aeruginosa PAO1]	0.3521	0.402859	0.652904
9951245	Uncharacterized protein	PA4963						PA4963	hypothetical protein PA4963 [Pseudomonas aeruginosa PAO1]	0.34699	0.346918	0.608977
9949065	3-oxoacyl-[acyl-carrier-protein] reductase FabG (EC 1.1.1.100) (3-ketoacyl-acyl carrier protein reductase) (Beta-Ketoacyl-acyl carrier protein reductase) (Beta-ketoacyl-ACP reductase)	fabG	PA2967					PA2967	3-oxoacyl-[acyl-carrier-protein] reductase [Pseudomonas aeruginosa PAO1]	0.346582	0.273066	0.548809
9950737	Probable metallopeptidase	PA4498						PA4498	probable metallopeptidase [Pseudomonas aeruginosa PAO1]	0.346179	0.891901	0.944578
9948647	CDP-diacylglycerol--glycerol-3-phosphate 3-phosphatidyltransferase	pgsA	PA2584					PA2584	CDP-diacylglycerol--glycerol-3-phosphate 3-phosphatidyltransferase [Pseudomonas aeruginosa PAO1]	0.345504	0.624687	0.801033
9946286	Uncharacterized protein	PA0429						PA0429	hypothetical protein PA0429 [Pseudomonas aeruginosa PAO1]	0.344889	0.0488525	0.262138
9946803	Uncharacterized protein	PA0902						PA0902	hypothetical protein PA0902 [Pseudomonas aeruginosa PAO1]	0.344683	0.507213	0.725665
9949246	Probable transcriptional regulator	PA3133						PA3133	probable transcriptional regulator [Pseudomonas aeruginosa PAO1]	0.344118	0.532345	0.744293
9950969	Heme/hemoglobin uptake outer membrane receptor PhuR	phuR	PA4710					PA4710	heme/hemoglobin uptake outer membrane receptor PhuR precursor [Pseudomonas aeruginosa PAO1]	0.344036	0.0893598	0.345757
9949609	Probable ATP-dependent RNA helicase	PA3466						PA3466	probable ATP-dependent RNA helicase [Pseudomonas aeruginosa PAO1]	0.335943	0.112549	0.380552
9951125	Bifunctional purine biosynthesis protein PurH [Includes: Phosphoribosylaminoimidazolecarboxamide formyltransferase (EC 2.1.2.3) (AICAR transformylase); IMP cyclohydrolase (EC 3.5.4.10) (ATIC) (IMP synthase) (Inosinicase)]	purH	PA4854					PA4854	phosphoribosylaminoimidazolecarboxamide formyltransferase [Pseudomonas aeruginosa PAO1]	0.334859	0.0515854	0.27023
9948844	Uncharacterized protein	PA2764						PA2764	hypothetical protein PA2764 [Pseudomonas aeruginosa PAO1]	0.332167	0.357768	0.615429
9951021	Carbamoyl-phosphate synthase small chain (EC 6.3.5.5) (Carbamoyl-phosphate synthetase glutamine chain)	carA	PA4758					PA4758	carbamoyl-phosphate synthase small chain [Pseudomonas aeruginosa PAO1]	0.329417	0.741206	0.876308
9949368	Cell division topological specificity factor	minE	PA3245					PA3245	cell division topological specificity factor MinE [Pseudomonas aeruginosa PAO1]	0.326588	0.782055	0.898507
9949783	5'-nucleotidase SurE (EC 3.1.3.5) (Nucleoside 5'-monophosphate phosphohydrolase)	surE	PA3625					PA3625	survival protein SurE [Pseudomonas aeruginosa PAO1]	0.326435	0.0603461	0.29101
9951128	RetS (Regulator of Exopolysaccharide and Type III Secretion)	retS	PA4856					PA4856	RetS (Regulator of Exopolysaccharide and Type III Secretion) [Pseudomonas aeruginosa PAO1]	0.325078	0.979952	0.992085
9951651	Catabolite repression control protein	crc	PA5332					PA5332	catabolite repression control protein [Pseudomonas aeruginosa PAO1]	0.324967	0.42574	0.67232
9947379	Transcriptional activator protein LasR	lasR	PA1430					PA1430	transcriptional regulator LasR [Pseudomonas aeruginosa PAO1]	0.320491	0.238247	0.514079
9949464	3-oxoacyl-[acyl-carrier-protein] synthase 3 (EC 2.3.1.180) (3-oxoacyl-[acyl-carrier-protein] synthase III) (Beta-ketoacyl-ACP synthase III) (KAS III)	fabH	PA3333					PA3333	3-oxoacyl-[acyl-carrier-protein] synthase III [Pseudomonas aeruginosa PAO1]	0.319528	0.12026	0.390134
9949452	Uncharacterized protein	PA3322						PA3322	hypothetical protein PA3322 [Pseudomonas aeruginosa PAO1]	0.318309	0.993218	0.997746
9951229	Bifunctional NAD(P)H-hydrate repair enzyme (Nicotinamide nucleotide repair protein)	PA4949						PA4949	conserved hypothetical protein [Pseudomonas aeruginosa PAO1]	0.316839	0.806763	0.910066
9949160	Uncharacterized protein	PA3054						PA3054	hypothetical protein PA3054 [Pseudomonas aeruginosa PAO1]	0.314063	0.174565	0.453409
9949106	Beta-hexosaminidase (EC 3.2.1.52) (Beta-N-acetylhexosaminidase) (N-acetyl-beta-glucosaminidase)	nagZ	PA3005					PA3005	beta-N-acetyl-D-glucosaminidase [Pseudomonas aeruginosa PAO1]	0.31368	0.357892	0.615429
9947418	Uncharacterized protein	PA1465						PA1465	hypothetical protein PA1465 [Pseudomonas aeruginosa PAO1]	0.313093	0.6405	0.810842
9947695	Type III export protein PscG (Pseudomonas secretion protein G)	pscG	PA1720					PA1720	type III export protein PscG [Pseudomonas aeruginosa PAO1]	0.309244	0.356973	0.615429
9951681	Phosphate regulon transcriptional regulatory protein PhoB	phoB	PA5360					PA5360	two-component response regulator PhoB [Pseudomonas aeruginosa PAO1]	0.302862	0.780114	0.897588
9949816	Elongation factor Ts (EF-Ts)	tsf	PA3655					PA3655	elongation factor Ts [Pseudomonas aeruginosa PAO1]	0.302757	0.156391	0.433414
9948408	Uncharacterized protein	PA2369						PA2369	hypothetical protein PA2369 [Pseudomonas aeruginosa PAO1]	0.302148	0.278497	0.551621
9945901	IcmF1	icmF1	PA0077					PA0077	IcmF1 [Pseudomonas aeruginosa PAO1]	0.300371	0.408443	0.656903
9946872	Crossover junction endodeoxyribonuclease RuvC (EC 3.1.22.4) (Holliday junction nuclease RuvC) (Holliday junction resolvase RuvC)	ruvC	PA0965					PA0965	Holliday junction resolvase RuvC [Pseudomonas aeruginosa PAO1]	0.29981	0.571836	0.767978
9950478	50S ribosomal protein L23	rplW	PA4261					PA4261	50S ribosomal protein L23 [Pseudomonas aeruginosa PAO1]	0.298579	0.438572	0.679887
9946452	Glycerol-3-phosphate acyltransferase (Acyl-PO4 G3P acyltransferase) (Acyl-phosphate--glycerol-3-phosphate acyltransferase) (G3P acyltransferase) (GPAT) (EC 2.3.1.n3) (Lysophosphatidic acid synthase) (LPA synthase)	plsY	PA0581					PA0581	conserved hypothetical protein [Pseudomonas aeruginosa PAO1]	0.298282	0.33848	0.603361
9949069	50S ribosomal protein L32	rpmF	PA2970					PA2970	50S ribosomal protein L32 [Pseudomonas aeruginosa PAO1]	0.297409	0.279551	0.552823
9951475	Ornithine carbamoyltransferase, catabolic (OTCase) (EC 2.1.3.3)	arcB	PA5172					PA5172	ornithine carbamoyltransferase, catabolic [Pseudomonas aeruginosa PAO1]	0.296967	0.123618	0.397535
9949228	USG-1 protein homolog	usg	PA3116					PA3116	probable aspartate-semialdehyde dehydrogenase [Pseudomonas aeruginosa PAO1]	0.295793	0.624948	0.801033
15597884	Ferric enterobactin receptor	pfeA	PA2688					PA2688	outer membrane receptor FepA [Pseudomonas aeruginosa PAO1]	0.294434	0.287056	0.556436
9948682	Thioredoxin reductase (EC 1.8.1.9)	trxB1	PA2616					PA2616	thioredoxin reductase 1 [Pseudomonas aeruginosa PAO1]	0.293388	0.45726	0.695991
9951889	Glutamine--fructose-6-phosphate aminotransferase [isomerizing] (EC 2.6.1.16) (D-fructose-6-phosphate amidotransferase) (GFAT) (Glucosamine-6-phosphate synthase) (Hexosephosphate aminotransferase) (L-glutamine--D-fructose-6-phosphate amidotransferase)	glmS	PA5549					PA5549	glucosamine--fructose-6-phosphate aminotransferase [Pseudomonas aeruginosa PAO1]	0.290683	0.111082	0.377647
9950776	Uncharacterized protein	PA4533						PA4533	hypothetical protein PA4533 [Pseudomonas aeruginosa PAO1]	0.290477	0.239047	0.514299
9947748	Putative phosphoenolpyruvate synthase regulatory protein (PEP synthase regulatory protein) (PSRP) (EC 2.7.11.33) (EC 2.7.4.28) (Pyruvate, water dikinase regulatory protein)	PA1769						PA1769	conserved hypothetical protein [Pseudomonas aeruginosa PAO1]	0.289507	0.80291	0.908007
9951331	Type 4 fimbrial biogenesis protein PilP	pilP	PA5041					PA5041	type 4 fimbrial biogenesis protein PilP [Pseudomonas aeruginosa PAO1]	0.288512	0.465004	0.701518
9946788	Arginine/ornithine binding protein AotJ	aotJ	PA0888					PA0888	arginine/ornithine binding protein AotJ [Pseudomonas aeruginosa PAO1]	0.286876	0.713524	0.855576
9947735	Phosphoserine phosphatase ThrH (PSP) (PSPase) (EC 3.1.3.3)	thrH	PA1757					PA1757	homoserine kinase [Pseudomonas aeruginosa PAO1]	0.285731	0.280132	0.553002
9949933	Phosphoribosylformylglycinamidine synthase (FGAM synthase) (FGAMS) (EC 6.3.5.3) (Formylglycinamide ribonucleotide amidotransferase) (FGAR amidotransferase) (FGAR-AT)	purL	PA3763					PA3763	phosphoribosylformylglycinamidine synthase [Pseudomonas aeruginosa PAO1]	0.284915	0.388037	0.6415
15595348	Probable transmembrane sensor	PA0150						PA0150	transmembrane sensor [Pseudomonas aeruginosa PAO1]	0.283692	0.386503	0.640423
9947381	Acyl-homoserine-lactone synthase (EC 2.3.1.184) (Autoinducer synthesis protein LasI)	lasI	PA1432					PA1432	autoinducer synthesis protein LasI [Pseudomonas aeruginosa PAO1]	0.283643	0.578592	0.770477
9945825	Uncharacterized protein	PA0007						PA0007	hypothetical protein PA0007 [Pseudomonas aeruginosa PAO1]	0.282786	0.757565	0.88502
9948721	Uncharacterized protein	PA2651						PA2651	conserved hypothetical protein [Pseudomonas aeruginosa PAO1]	0.282411	0.689569	0.842943
15595704	Probable acyl-CoA dehydrogenase	PA0507						PA0507	acyl-CoA dehydrogenase [Pseudomonas aeruginosa PAO1]	0.281953	0.970581	0.988003
15599503	Methyl-accepting chemotaxis protein PctC	pctC	PA4307					PA4307	chemotactic transducer PctC [Pseudomonas aeruginosa PAO1]	0.278985	0.292417	0.559479
9949212	Type II secretion system protein F (T2SS protein F) (General secretion pathway protein F)	xcpS	PA3102					PA3102	general secretion pathway protein F [Pseudomonas aeruginosa PAO1]	0.27821	0.851172	0.929782
9951625	Probable oxidoreductase	PA5309						PA5309	probable oxidoreductase [Pseudomonas aeruginosa PAO1]	0.275602	0.301896	0.567949
9951234	Chemotaxis protein MotB	motB	PA4953					PA4953	chemotaxis protein MotB [Pseudomonas aeruginosa PAO1]	0.272887	0.852241	0.929782
9951432	Uncharacterized protein	PA5133						PA5133	conserved hypothetical protein [Pseudomonas aeruginosa PAO1]	0.272432	0.753944	0.882529
9949345	Uncharacterized protein	PA3224						PA3224	hypothetical protein PA3224 [Pseudomonas aeruginosa PAO1]	0.272348	0.955551	0.980467
9950169	Uncharacterized protein	PA3978						PA3978	hypothetical protein PA3978 [Pseudomonas aeruginosa PAO1]	0.272215	0.813785	0.912685
9946367	Malonyl-[acyl-carrier protein] O-methyltransferase (Malonyl-ACP O-methyltransferase) (EC 2.1.1.197) (Biotin synthesis protein BioC)	bioC	PA0503					PA0503	probable biotin synthesis protein BioC [Pseudomonas aeruginosa PAO1]	0.271289	0.378414	0.634752
9949940	GMP synthase [glutamine-hydrolyzing] (EC 6.3.5.2) (GMP synthetase) (Glutamine amidotransferase)	guaA	PA3769					PA3769	GMP synthase [Pseudomonas aeruginosa PAO1]	0.271036	0.0629704	0.293881
9949837	Uncharacterized protein	PA3674						PA3674	hypothetical protein PA3674 [Pseudomonas aeruginosa PAO1]	0.270302	0.734858	0.871859
9946291	Uncharacterized protein	PA0434						PA0434	hypothetical protein PA0434 [Pseudomonas aeruginosa PAO1]	0.269436	0.210272	0.490156
9950860	DNA repair protein RadA (EC 3.6.4.-) (Branch migration protein RadA)	radA	PA4609					PA4609	DNA repair protein RadA [Pseudomonas aeruginosa PAO1]	0.266661	0.560853	0.761457
9946402	Probable transcriptional regulator	PA0535						PA0535	probable transcriptional regulator [Pseudomonas aeruginosa PAO1]	0.266626	0.274193	0.550016
9946848	Uncharacterized protein	PA0943						PA0943	hypothetical protein PA0943 [Pseudomonas aeruginosa PAO1]	0.266437	0.868138	0.935728
9946085	Probable major facilitator superfamily (MFS) transporter	PA0246						PA0246	probable major facilitator superfamily (MFS) transporter [Pseudomonas aeruginosa PAO1]	0.266284	0.104074	0.367917
9950440	Pyochelin synthetase	pchF	PA4225					PA4225	pyochelin synthetase [Pseudomonas aeruginosa PAO1]	0.265721	0.864287	0.934568
9946203	Dihydroxy-acid dehydratase (DAD) (EC 4.2.1.9)	ilvD	PA0353					PA0353	dihydroxy-acid dehydratase [Pseudomonas aeruginosa PAO1]	0.26502	0.414256	0.661362
9949457	ATP-dependent Clp protease proteolytic subunit 2 (EC 3.4.21.92) (Endopeptidase Clp 2)	clpP2	PA3326					PA3326	probable Clp-family ATP-dependent protease [Pseudomonas aeruginosa PAO1]	0.264246	0.467582	0.702533
9947793	Probable permease of ABC transporter	PA1809						PA1809	probable permease of ABC transporter [Pseudomonas aeruginosa PAO1]	0.263406	0.522444	0.736852
9951790	Uncharacterized protein	PA5459						PA5459	hypothetical protein PA5459 [Pseudomonas aeruginosa PAO1]	0.262003	0.109824	0.376336
9951754	N5-carboxyaminoimidazole ribonucleotide mutase (N5-CAIR mutase) (EC 5.4.99.18) (5-(carboxyamino)imidazole ribonucleotide mutase)	purE	PA5426					PA5426	phosphoribosylaminoimidazole carboxylase, catalytic subunit [Pseudomonas aeruginosa PAO1]	0.261024	0.402221	0.652904
9950673	Tryptophan--tRNA ligase (EC 6.1.1.2) (Tryptophanyl-tRNA synthetase) (TrpRS)	trpS	PA4439					PA4439	tryptophanyl-tRNA synthetase [Pseudomonas aeruginosa PAO1]	0.259019	0.194282	0.473215
9946727	Uncharacterized protein	PA0832						PA0832	conserved hypothetical protein [Pseudomonas aeruginosa PAO1]	0.255993	0.889768	0.944578
9950115	Cyanide insensitive terminal oxidase	cioA	PA3930					PA3930	cyanide insensitive terminal oxidase [Pseudomonas aeruginosa PAO1]	0.255417	0.137695	0.413253
9945986	Transcriptional regulator PcaR	pcaR	PA0155					PA0155	transcriptional regulator PcaR [Pseudomonas aeruginosa PAO1]	0.253533	0.273126	0.548809
9946801	Uncharacterized protein	PA0900						PA0900	hypothetical protein PA0900 [Pseudomonas aeruginosa PAO1]	0.253046	0.777538	0.896587
9948850	Uncharacterized isomerase PA2770 (EC 5.1.-.-)	PA2770						PA2770	hypothetical protein PA2770 [Pseudomonas aeruginosa PAO1]	0.250515	0.390454	0.642413
9950191	D-ala-D-ala-carboxypeptidase	dacC	PA3999					PA3999	D-ala-D-ala-carboxypeptidase [Pseudomonas aeruginosa PAO1]	0.249051	0.320165	0.586886
9949562	Probable transcriptional regulator	PA3423						PA3423	probable transcriptional regulator [Pseudomonas aeruginosa PAO1]	0.247054	0.56814	0.766502
9951474	Arginine deiminase (ADI) (EC 3.5.3.6) (Arginine dihydrolase) (AD)	arcA	PA5171					PA5171	arginine deiminase [Pseudomonas aeruginosa PAO1]	0.246894	0.283615	0.554108
15598886	Probable metal-transporting P-type ATPase	PA3690						PA3690	metal-transporting P-type ATPase [Pseudomonas aeruginosa PAO1]	0.246494	0.289923	0.558576
9950443	Regulatory protein PchR	pchR	PA4227					PA4227	transcriptional regulator PchR [Pseudomonas aeruginosa PAO1]	0.245649	0.489225	0.715207
9946178	Ribose-5-phosphate isomerase A (EC 5.3.1.6) (Phosphoriboisomerase A) (PRI)	rpiA	PA0330					PA0330	ribose 5-phosphate isomerase [Pseudomonas aeruginosa PAO1]	0.245596	0.119779	0.390134
9951533	UPF0149 protein PA5225	PA5225						PA5225	hypothetical protein PA5225 [Pseudomonas aeruginosa PAO1]	0.243057	0.857053	0.931203
9945837	Methionyl-tRNA formyltransferase (EC 2.1.2.9)	fmt	PA0018					PA0018	methionyl-tRNA formyltransferase [Pseudomonas aeruginosa PAO1]	0.240119	0.551718	0.759858
9951003	30S ribosomal protein S15	rpsO	PA4741					PA4741	30S ribosomal protein S15 [Pseudomonas aeruginosa PAO1]	0.238121	0.879853	0.938785
9947307	Probable siderophore receptor	PA1365						PA1365	probable siderophore receptor [Pseudomonas aeruginosa PAO1]	0.238032	0.865994	0.934893
9950524	TadA ATPase	tadA	PA4302					PA4302	TadA ATPase [Pseudomonas aeruginosa PAO1]	0.2378	0.245077	0.518626
9947014	Transcriptional regulator FleQ	fleQ	PA1097					PA1097	transcriptional regulator FleQ [Pseudomonas aeruginosa PAO1]	0.237711	0.261456	0.535848
9946283	Outer membrane protein OprM	oprM	oprK	PA0427				PA0427	Major intrinsic multiple antibiotic resistance efflux outer membrane protein OprM precursor [Pseudomonas aeruginosa PAO1]	0.237429	0.701844	0.850918
9947543	Citrate synthase (EC 2.3.3.16)	gltA	PA1580					PA1580	citrate synthase [Pseudomonas aeruginosa PAO1]	0.236415	0.992731	0.997746
9946481	Ribulose-phosphate 3-epimerase (EC 5.1.3.1)	rpe	PA0607					PA0607	ribulose-phosphate 3-epimerase [Pseudomonas aeruginosa PAO1]	0.236214	0.64343	0.811514
9947437	Cytochrome c-type biogenesis protein CycH	cycH	PA1483					PA1483	cytochrome c-type biogenesis protein [Pseudomonas aeruginosa PAO1]	0.235126	0.123756	0.397535
9949985	Co-chaperone protein HscB homolog	hscB	PA3811					PA3811	heat shock protein HscB [Pseudomonas aeruginosa PAO1]	0.235116	0.189689	0.469285
9950659	Uncharacterized protein	PA4426						PA4426	conserved hypothetical protein [Pseudomonas aeruginosa PAO1]	0.234496	0.145473	0.420394
9946654	Serine protease MucD	mucD	PA0766					PA0766	serine protease MucD precursor [Pseudomonas aeruginosa PAO1]	0.23295	0.604764	0.788736
9951641	Acetylglutamate kinase (EC 2.7.2.8) (N-acetyl-L-glutamate 5-phosphotransferase) (NAG kinase) (AGK)	argB	PA5323					PA5323	acetylglutamate kinase [Pseudomonas aeruginosa PAO1]	0.23215	0.1804	0.460887
9949914	Signal recognition particle protein (Fifty-four homolog)	ffh	PA3746					PA3746	signal recognition particle protein Ffh [Pseudomonas aeruginosa PAO1]	0.231447	0.400101	0.652375
9947545	Succinate dehydrogenase hydrophobic membrane anchor subunit	sdhD	PA1582					PA1582	succinate dehydrogenase (D subunit) [Pseudomonas aeruginosa PAO1]	0.231332	0.434498	0.677128
9951658	Uncharacterized protein	PA5339						PA5339	conserved hypothetical protein [Pseudomonas aeruginosa PAO1]	0.231306	0.521425	0.736294
9948322	Porin	PA2291						PA2291	probable glucose-sensitive porin [Pseudomonas aeruginosa PAO1]	0.229804	0.773431	0.893565
9947611	Selenide, water dikinase (EC 2.7.9.3) (Selenium donor protein) (Selenophosphate synthase)	selD	PA1642					PA1642	selenophosphate synthetase [Pseudomonas aeruginosa PAO1]	0.229705	0.560431	0.761321
9949892	Uncharacterized protein	PA3726						PA3726	conserved hypothetical protein [Pseudomonas aeruginosa PAO1]	0.229454	0.551283	0.759824
9946627	Uncharacterized protein	PA0741						PA0741	conserved hypothetical protein [Pseudomonas aeruginosa PAO1]	0.228557	0.892781	0.944578
9945831	Uncharacterized protein	PA0012						PA0012	hypothetical protein PA0012 [Pseudomonas aeruginosa PAO1]	0.227148	0.553992	0.760504
9949481	Chemotaxis protein methyltransferase 1 (EC 2.1.1.80)	cheR1	PA3348					PA3348	probable chemotaxis protein methyltransferase [Pseudomonas aeruginosa PAO1]	0.225657	0.42602	0.67232
9949678	Probable peroxidase	PA3529						PA3529	probable peroxidase [Pseudomonas aeruginosa PAO1]	0.224513	0.217647	0.496437
9951287	Uncharacterized protein	PA5001						PA5001	hypothetical protein PA5001 [Pseudomonas aeruginosa PAO1]	0.223237	0.600579	0.785661
9947827	Uncharacterized protein	PA1840						PA1840	hypothetical protein PA1840 [Pseudomonas aeruginosa PAO1]	0.223134	0.694742	0.845944
9949244	Probable aldolase	PA3131						PA3131	probable aldolase [Pseudomonas aeruginosa PAO1]	0.221174	0.791	0.903071
9947020	Probable flagellar assembly protein	PA1103						PA1103	probable flagellar assembly protein [Pseudomonas aeruginosa PAO1]	0.218361	0.832146	0.92297
9951886	Uncharacterized protein	PA5546						PA5546	conserved hypothetical protein [Pseudomonas aeruginosa PAO1]	0.217989	0.627484	0.803847
9947078	Ribonucleoside-diphosphate reductase (EC 1.17.4.1)	nrdA	PA1156					PA1156	NrdA, catalytic component of class Ia ribonucleotide reductase [Pseudomonas aeruginosa PAO1]	0.217196	0.191191	0.469285
9950255	Uncharacterized protein	PA4058						PA4058	hypothetical protein PA4058 [Pseudomonas aeruginosa PAO1]	0.213761	0.905319	0.949559
9951664	ATP-dependent DNA helicase RecG (EC 3.6.4.12)	recG	PA5345					PA5345	ATP-dependent DNA helicase RecG [Pseudomonas aeruginosa PAO1]	0.213662	0.149083	0.427641
9947778	Bifunctional protein FolD [Includes: Methylenetetrahydrofolate dehydrogenase (EC 1.5.1.5); Methenyltetrahydrofolate cyclohydrolase (EC 3.5.4.9)]	folD	PA1796					PA1796	5,10-methylene-tetrahydrofolate dehydrogenase / cyclohydrolase [Pseudomonas aeruginosa PAO1]	0.212591	0.310183	0.576076
9949965	2-isopropylmalate synthase (EC 2.3.3.13) (Alpha-IPM synthase) (Alpha-isopropylmalate synthase)	leuA	PA3792					PA3792	2-isopropylmalate synthase [Pseudomonas aeruginosa PAO1]	0.212525	0.452395	0.691329
9950721	Glutamyl-tRNA(Gln) amidotransferase subunit A (Glu-ADT subunit A) (EC 6.3.5.7)	gatA	PA4483					PA4483	Glu-tRNA(Gln) amidotransferase subunit A [Pseudomonas aeruginosa PAO1]	0.212059	0.152024	0.431404
9945827	Glycine--tRNA ligase alpha subunit (EC 6.1.1.14) (Glycyl-tRNA synthetase alpha subunit) (GlyRS)	glyQ	PA0009					PA0009	glycyl-tRNA synthetase alpha chain [Pseudomonas aeruginosa PAO1]	0.211746	0.258161	0.531866
9948254	Uncharacterized protein	PA2229						PA2229	conserved hypothetical protein [Pseudomonas aeruginosa PAO1]	0.210722	0.604521	0.788736
9949828	2,3,4,5-tetrahydropyridine-2,6-dicarboxylate N-succinyltransferase (EC 2.3.1.117) (Tetrahydrodipicolinate N-succinyltransferase) (THDP succinyltransferase) (THP succinyltransferase) (Tetrahydropicolinate succinylase)	dapD	PA3666					PA3666	tetrahydrodipicolinate succinylase [Pseudomonas aeruginosa PAO1]	0.210225	0.193394	0.471971
9951844	Probable glutamine synthetase	PA5508						PA5508	probable glutamine synthetase [Pseudomonas aeruginosa PAO1]	0.20915	0.80097	0.906998
9949688	Probable ATP-binding component of ABC transporter	PA3538						PA3538	probable ATP-binding component of ABC transporter [Pseudomonas aeruginosa PAO1]	0.209019	0.680524	0.835962
9951739	Low specificity L-threonine aldolase (Low specificity L-TA) (EC 4.1.2.48)	ltaE	PA5413					PA5413	low specificity l-threonine aldolase [Pseudomonas aeruginosa PAO1]	0.208517	0.373321	0.631836
9951374	Proline iminopeptidase (EC 3.4.11.5)	PA5080						PA5080	prolyl aminopeptidase [Pseudomonas aeruginosa PAO1]	0.206801	0.912169	0.953624
9950450	UvrABC system protein A (UvrA protein) (Excinuclease ABC subunit A)	uvrA	PA4234					PA4234	excinuclease ABC subunit A [Pseudomonas aeruginosa PAO1]	0.204725	0.552804	0.760146
9951531	UbiH protein	ubiH	PA5223					PA5223	ubiH protein [Pseudomonas aeruginosa PAO1]	0.203553	0.349028	0.610412
9950781	NADH dehydrogenase	ndh	PA4538					PA4538	NADH dehydrogenase [Pseudomonas aeruginosa PAO1]	0.202943	0.323799	0.588975
9947660	Polyamine aminopropyltransferase 1 (Putrescine aminopropyltransferase) (PAPT) (Spermidine synthase) (SPDS) (SPDSY) (EC 2.5.1.16)	speE1	speE	PA1687				PA1687	spermidine synthase [Pseudomonas aeruginosa PAO1]	0.201132	0.76916	0.892425
15600265	Probable chemotaxis transducer	PA5072						PA5072	chemotaxis transducer [Pseudomonas aeruginosa PAO1]	0.20075	0.707936	0.853591
9946074	Probable transcriptional regulator	PA0236						PA0236	probable transcriptional regulator [Pseudomonas aeruginosa PAO1]	0.2007	0.277721	0.55147
9946755	UPF0176 protein PA0858	PA0858						PA0858	conserved hypothetical protein [Pseudomonas aeruginosa PAO1]	0.198115	0.771784	0.893226
9950140	Uncharacterized protein	PA3952						PA3952	hypothetical protein PA3952 [Pseudomonas aeruginosa PAO1]	0.19731	0.556973	0.761181
9951866	Uncharacterized protein	PA5528						PA5528	hypothetical protein PA5528 [Pseudomonas aeruginosa PAO1]	0.19714	0.996753	0.998445
9946467	LPS-assembly protein LptD	lptD	imp	ostA	PA0595			PA0595	organic solvent tolerance protein OstA precursor [Pseudomonas aeruginosa PAO1]	0.196448	0.702456	0.850949
9946190	Prolipoprotein diacylglyceryl transferase (EC 2.4.99.-)	lgt	PA0341					PA0341	prolipoprotein diacylglyceryl transferase [Pseudomonas aeruginosa PAO1]	0.196305	0.177789	0.458254
9946466	Chaperone SurA (Peptidyl-prolyl cis-trans isomerase SurA) (PPIase SurA) (EC 5.2.1.8) (Rotamase SurA)	surA	PA0594					PA0594	peptidyl-prolyl cis-trans isomerase SurA [Pseudomonas aeruginosa PAO1]	0.195778	0.218861	0.496437
9947046	Probable oxidoreductase	PA1127						PA1127	probable oxidoreductase [Pseudomonas aeruginosa PAO1]	0.194768	0.326232	0.59137
9949112	Uncharacterized protein	PA3010						PA3010	hypothetical protein PA3010 [Pseudomonas aeruginosa PAO1]	0.191808	0.740588	0.876308
9950979	tRNA/tmRNA (uracil-C(5))-methyltransferase (EC 2.1.1.-) (EC 2.1.1.35) (tRNA (uracil(54)-C(5))-methyltransferase) (tRNA(m5U54)-methyltransferase) (RUMT) (tmRNA (uracil(341)-C(5))-methyltransferase)	trmA	PA4720					PA4720	tRNA (uracil-5-)-methyltransferase [Pseudomonas aeruginosa PAO1]	0.190102	0.69051	0.843285
9947814	Probable short-chain dehydrogenase	PA1828						PA1828	probable short-chain dehydrogenase [Pseudomonas aeruginosa PAO1]	0.188316	0.546794	0.755778
9951238	Phosphatidylserine decarboxylase proenzyme (EC 4.1.1.65) [Cleaved into: Phosphatidylserine decarboxylase alpha chain; Phosphatidylserine decarboxylase beta chain]	psd	PA4957					PA4957	phosphatidylserine decarboxylase [Pseudomonas aeruginosa PAO1]	0.187052	0.494362	0.720378
9949328	Uncharacterized protein	PA3208						PA3208	conserved hypothetical protein [Pseudomonas aeruginosa PAO1]	0.186475	0.457301	0.695991
9949438	Uncharacterized protein	PA3309						PA3309	conserved hypothetical protein [Pseudomonas aeruginosa PAO1]	0.185708	0.128504	0.403454
9948019	Putative isovaleryl-CoA dehydrogenase	liuA	PA2015					PA2015	putative isovaleryl-CoA dehydrogenase [Pseudomonas aeruginosa PAO1]	0.185273	0.666215	0.827853
9950455	DNA-directed RNA polymerase subunit alpha (RNAP subunit alpha) (EC 2.7.7.6) (RNA polymerase subunit alpha) (Transcriptase subunit alpha)	rpoA	PA4238					PA4238	DNA-directed RNA polymerase alpha chain [Pseudomonas aeruginosa PAO1]	0.184731	0.351596	0.611731
9950533	Methyl-accepting chemotaxis protein PctB	pctB	PA4310					PA4310	chemotactic transducer PctB [Pseudomonas aeruginosa PAO1]	0.183994	0.386648	0.640423
9949994	Protein translocase subunit SecF	secF	PA3820					PA3820	secretion protein SecF [Pseudomonas aeruginosa PAO1]	0.183739	0.509609	0.727001
9947624	Probable aminotransferase	PA1654						PA1654	probable aminotransferase [Pseudomonas aeruginosa PAO1]	0.180817	0.27195	0.548782
9951659	Uncharacterized protein	PA5340						PA5340	hypothetical protein PA5340 [Pseudomonas aeruginosa PAO1]	0.180678	0.559654	0.761181
9950953	Acetolactate synthase (EC 2.2.1.6)	ilvI	PA4696					PA4696	acetolactate synthase large subunit [Pseudomonas aeruginosa PAO1]	0.17991	0.268078	0.544223
9946880	Peptidoglycan-associated lipoprotein	pal	oprL	PA0973				PA0973	Peptidoglycan associated lipoprotein OprL precursor [Pseudomonas aeruginosa PAO1]	0.179417	0.159576	0.4356
158430664	Periplasmic binding protein	phuT						PA4708	Chain A, Crystal Structure Of A Periplasmic Heme Binding Protein From Pseudomonas Aeruginosa	0.179343	0.951251	0.976904
9947775	Peptidyl-prolyl cis-trans isomerase (PPIase) (EC 5.2.1.8)	ppiB	PA1793					PA1793	peptidyl-prolyl cis-trans isomerase B [Pseudomonas aeruginosa PAO1]	0.179286	0.78073	0.897859
9950318	Uncharacterized protein	PA4115						PA4115	conserved hypothetical protein [Pseudomonas aeruginosa PAO1]	0.178294	0.34783	0.609494
9946159	L-cysteine transporter of ABC system YecS	PA0313						PA0313	L-cysteine transporter of ABC system YecS [Pseudomonas aeruginosa PAO1]	0.178042	0.425316	0.672136
9950894	Probable malate:quinone oxidoreductase 2 (EC 1.1.5.4) (MQO 2) (Malate dehydrogenase [quinone] 2)	mqo2	mqoB	PA4640				PA4640	malate:quinone oxidoreductase [Pseudomonas aeruginosa PAO1]	0.177905	0.740598	0.876308
9951835	Zinc import ATP-binding protein ZnuC (EC 3.6.3.-)	znuC	PA5500					PA5500	zinc transport protein ZnuC [Pseudomonas aeruginosa PAO1]	0.177583	0.642937	0.811514
9948125	Uncharacterized protein	PA2111						PA2111	hypothetical protein PA2111 [Pseudomonas aeruginosa PAO1]	0.176644	0.96536	0.985394
9949052	Uncharacterized protein	PA2955						PA2955	hypothetical protein PA2955 [Pseudomonas aeruginosa PAO1]	0.176265	0.996306	0.998421
9949107	Transcriptional regulator PsrA	psrA	PA3006					PA3006	transcriptional regulator PsrA [Pseudomonas aeruginosa PAO1]	0.174242	0.783807	0.899644
9945838	Peptide deformylase (PDF) (EC 3.5.1.88) (Polypeptide deformylase)	def	PA0019					PA0019	polypeptide deformylase [Pseudomonas aeruginosa PAO1]	0.174205	0.677389	0.833846
9948698	Probable acetyl transferase	PA2631						PA2631	probable acetyl transferase [Pseudomonas aeruginosa PAO1]	0.174039	0.841968	0.926783
9951808	Acetyltransferase PA5475 (EC 2.3.1.-) (GCN5-related N-acetyltransferase) (GNAT)	PA5475						PA5475	hypothetical protein PA5475 [Pseudomonas aeruginosa PAO1]	0.173557	0.896872	0.946857
9947285	Probable short-chain dehydrogenase	PA1344						PA1344	probable short-chain dehydrogenase [Pseudomonas aeruginosa PAO1]	0.173324	0.48598	0.713556
9946416	Transketolase (EC 2.2.1.1)	tktA	PA0548					PA0548	transketolase [Pseudomonas aeruginosa PAO1]	0.173228	0.218141	0.496437
9946822	Uncharacterized protein	PA0919						PA0919	hypothetical protein PA0919 [Pseudomonas aeruginosa PAO1]	0.173097	0.502292	0.724331
9949072	Probable peptidase	PA2973						PA2973	probable peptidase [Pseudomonas aeruginosa PAO1]	0.172086	0.864064	0.934568
9950431	Flavin-containing monooxygenase	phzS	PA4217					PA4217	flavin-containing monooxygenase [Pseudomonas aeruginosa PAO1]	0.17188	0.932232	0.965752
9948048	Serine/threonine transporter SstT (Na(+)/serine-threonine symporter)	sstT	PA2042					PA2042	probable transporter (membrane subunit) [Pseudomonas aeruginosa PAO1]	0.170994	0.63174	0.806237
9950439	Pyochelin biosynthetic protein PchG	pchG	PA4224					PA4224	pyochelin biosynthetic protein PchG [Pseudomonas aeruginosa PAO1]	0.169368	0.826378	0.919886
9950802	4-hydroxy-3-methylbut-2-enyl diphosphate reductase (EC 1.17.7.4)	ispH	lytB	PA4557				PA4557	LytB protein [Pseudomonas aeruginosa PAO1]	0.169031	0.48153	0.711088
9949682	Glutaredoxin	PA3533						PA3533	conserved hypothetical protein [Pseudomonas aeruginosa PAO1]	0.167856	0.44733	0.687057
9950814	50S ribosomal protein L21	rplU	PA4568					PA4568	50S ribosomal protein L21 [Pseudomonas aeruginosa PAO1]	0.167319	0.609176	0.789388
9948736	Probable transcriptional regulator	PA2665						PA2665	probable transcriptional regulator [Pseudomonas aeruginosa PAO1]	0.16686	0.664424	0.827703
9951416	tRNA sulfurtransferase (EC 2.8.1.4) (Sulfur carrier protein ThiS sulfurtransferase) (Thiamine biosynthesis protein ThiI) (tRNA 4-thiouridine synthase)	thiI	PA5118					PA5118	thiazole biosynthesis protein ThiI [Pseudomonas aeruginosa PAO1]	0.165553	0.426883	0.672406
9951540	Uncharacterized protein	PA5232						PA5232	conserved hypothetical protein [Pseudomonas aeruginosa PAO1]	0.165309	0.670522	0.829592
9947041	Peptide deformylase (EC 3.5.1.88)	PA1122						PA1122	probable peptide deformylase [Pseudomonas aeruginosa PAO1]	0.164898	0.853383	0.929782
9947613	Uncharacterized protein	PA1644						PA1644	conserved hypothetical protein [Pseudomonas aeruginosa PAO1]	0.164541	0.528994	0.741361
9946918	Bacterioferritin comigratory protein	bcp	PA1008					PA1008	bacterioferritin comigratory protein [Pseudomonas aeruginosa PAO1]	0.164159	0.429917	0.673546
9949048	Electron transfer flavoprotein subunit alpha (Alpha-ETF) (Electron transfer flavoprotein large subunit) (ETFLS)	etfA	PA2951					PA2951	electron transfer flavoprotein alpha-subunit [Pseudomonas aeruginosa PAO1]	0.164154	0.720839	0.862596
9950963	Uncharacterized protein	PA4705						PA4705	hypothetical protein PA4705 [Pseudomonas aeruginosa PAO1]	0.162145	0.8291	0.921901
9950890	Uncharacterized protein	PA4636						PA4636	hypothetical protein PA4636 [Pseudomonas aeruginosa PAO1]	0.161311	0.408206	0.656903
9951310	Uncharacterized protein	PA5022						PA5022	conserved hypothetical protein [Pseudomonas aeruginosa PAO1]	0.161207	0.903283	0.948689
9947815	Uncharacterized protein	PA1829						PA1829	hypothetical protein PA1829 [Pseudomonas aeruginosa PAO1]	0.160046	0.74285	0.877565
9950690	Probable permease of ABC transporter	PA4455						PA4455	probable permease of ABC transporter [Pseudomonas aeruginosa PAO1]	0.158303	0.529771	0.741428
9946839	GTP pyrophosphokinase	relA	PA0934					PA0934	GTP pyrophosphokinase [Pseudomonas aeruginosa PAO1]	0.154591	0.837506	0.924428
9947522	Aerotaxis receptor Aer	aer	PA1561					PA1561	aerotaxis receptor Aer [Pseudomonas aeruginosa PAO1]	0.154206	0.429684	0.673546
9947728	Phospho-2-dehydro-3-deoxyheptonate aldolase (EC 2.5.1.54) (3-deoxy-D-arabino-heptulosonate 7-phosphate synthase) (DAHP synthase) (Phospho-2-keto-3-deoxyheptonate aldolase)	PA1750						PA1750	phospho-2-dehydro-3-deoxyheptonate aldolase [Pseudomonas aeruginosa PAO1]	0.153683	0.567373	0.765905
9950935	Uncharacterized protein	PA4679						PA4679	hypothetical protein PA4679 [Pseudomonas aeruginosa PAO1]	0.15342	0.928222	0.964158
9949992	Inositol-1-monophosphatase (I-1-Pase) (IMPase) (Inositol-1-phosphatase) (EC 3.1.3.25)	suhB	PA3818					PA3818	extragenic suppressor protein SuhB [Pseudomonas aeruginosa PAO1]	0.153091	0.487334	0.714212
9950461	50S ribosomal protein L15	rplO	PA4244					PA4244	50S ribosomal protein L15 [Pseudomonas aeruginosa PAO1]	0.15272	0.932746	0.965752
9950603	Probable Resistance-Nodulation-Cell Division (RND) efflux membrane fusion protein	PA4374						PA4374	probable Resistance-Nodulation-Cell Division (RND) efflux membrane fusion protein precursor [Pseudomonas aeruginosa PAO1]	0.15247	0.638143	0.809595
9951022	4-hydroxy-tetrahydrodipicolinate reductase (HTPA reductase) (EC 1.17.1.8)	dapB	PA4759					PA4759	dihydrodipicolinate reductase [Pseudomonas aeruginosa PAO1]	0.150694	0.622929	0.801008
9948811	Uncharacterized protein	PA2734						PA2734	hypothetical protein PA2734 [Pseudomonas aeruginosa PAO1]	0.150575	0.832275	0.92297
9950256	Uncharacterized protein	PA4059						PA4059	hypothetical protein PA4059 [Pseudomonas aeruginosa PAO1]	0.149959	0.839399	0.926084
9950146	Uncharacterized protein	PA3958						PA3958	hypothetical protein PA3958 [Pseudomonas aeruginosa PAO1]	0.149844	0.968487	0.986764
9946962	Probable outer membrane protein	PA1048						PA1048	probable outer membrane protein precursor [Pseudomonas aeruginosa PAO1]	0.149385	0.747645	0.878507
9950705	Uncharacterized protein	PA4469						PA4469	hypothetical protein PA4469 [Pseudomonas aeruginosa PAO1]	0.147446	0.86803	0.935728
9950944	Ferric iron-binding periplasmic protein HitA	hitA	PA4687					PA4687	ferric iron-binding periplasmic protein HitA [Pseudomonas aeruginosa PAO1]	0.147138	0.968095	0.986764
9951249	DNA topoisomerase 4 subunit B (EC 5.99.1.3) (Topoisomerase IV subunit B)	parE	PA4967					PA4967	topoisomerase IV subunit B [Pseudomonas aeruginosa PAO1]	0.146634	0.723639	0.864073
9946798	Arginine N-succinyltransferase subunit beta (EC 2.3.1.109) (AOST) (AST) (ARUAII)	aruG	PA0897					PA0897	arginine/ornithine succinyltransferase AII subunit [Pseudomonas aeruginosa PAO1]	0.14482	0.476317	0.708177
9951476	Carbamate kinase (EC 2.7.2.2)	arcC	PA5173					PA5173	carbamate kinase [Pseudomonas aeruginosa PAO1]	0.143525	0.42232	0.670093
307752087	Peptide chain release factor 2 (RF-2)	prfB	PA3701					PA3701	peptide chain release factor I [Pseudomonas aeruginosa PAO1]	0.142256	0.736234	0.872615
9947845	Uncharacterized protein	PA1857						PA1857	conserved hypothetical protein [Pseudomonas aeruginosa PAO1]	0.141677	0.683662	0.837637
9950101	Molybdopterin synthase sulfur carrier subunit	moaD	PA3917					PA3917	molybdopterin converting factor, small subunit [Pseudomonas aeruginosa PAO1]	0.140458	0.756953	0.88502
9951653	Ribonuclease PH (RNase PH) (EC 2.7.7.56) (tRNA nucleotidyltransferase)	rph	PA5334					PA5334	ribonuclease PH [Pseudomonas aeruginosa PAO1]	0.139898	0.985619	0.995741
9948956	Probable chemotaxis transducer	PA2867						PA2867	probable chemotaxis transducer [Pseudomonas aeruginosa PAO1]	0.138141	0.860037	0.932727
9947504	Uncharacterized protein PA1545	PA1545						PA1545	hypothetical protein PA1545 [Pseudomonas aeruginosa PAO1]	0.135987	0.804537	0.908953
9951502	Probable alpha-L-glutamate ligase (EC 6.3.2.-)	rimK	PA5197					PA5197	ribosomal protein S6 modification protein [Pseudomonas aeruginosa PAO1]	0.134284	0.935543	0.96666
9950322	Aminoglycoside 3'-phosphotransferase type IIb	aph	PA4119					PA4119	aminoglycoside 3'-phosphotransferase type IIb [Pseudomonas aeruginosa PAO1]	0.133906	0.380569	0.636775
9947552	Succinyl-CoA ligase [ADP-forming] subunit beta (EC 6.2.1.5) (Succinyl-CoA synthetase subunit beta) (SCS-beta)	sucC	PA1588					PA1588	succinyl-CoA synthetase beta chain [Pseudomonas aeruginosa PAO1]	0.13368	0.647507	0.81534
9950036	Probable amino acid-binding protein	PA3858						PA3858	probable amino acid-binding protein [Pseudomonas aeruginosa PAO1]	0.133585	0.865454	0.934738
9950479	50S ribosomal protein L4	rplD	PA4262					PA4262	50S ribosomal protein L4 [Pseudomonas aeruginosa PAO1]	0.132406	0.488442	0.714948
9948131	UPF0317 protein PA2116	PA2116						PA2116	conserved hypothetical protein [Pseudomonas aeruginosa PAO1]	0.131516	0.59952	0.785139
9949978	Type 4 fimbrial biogenesis protein PilF	pilF	PA3805					PA3805	type 4 fimbrial biogenesis protein PilF [Pseudomonas aeruginosa PAO1]	0.13144	0.325989	0.59137
9948261	PslF	pslF	PA2236					PA2236	PslF [Pseudomonas aeruginosa PAO1]	0.131019	0.892032	0.944578
9951356	Uncharacterized protein	PA5064						PA5064	hypothetical protein PA5064 [Pseudomonas aeruginosa PAO1]	0.130462	0.424201	0.671272
9950960	Uncharacterized protein	PA4702						PA4702	hypothetical protein PA4702 [Pseudomonas aeruginosa PAO1]	0.130022	0.649886	0.815726
9951113	Probable two-component response regulator	PA4843						PA4843	probable two-component response regulator [Pseudomonas aeruginosa PAO1]	0.129177	0.758045	0.885126
9949619	Cyclohexadienyl dehydratase [Includes: Prephenate dehydratase (EC 4.2.1.51); Arogenate dehydratase (EC 4.2.1.91)]	pheC	PA3475					PA3475	cyclohexadienyl dehydratase precursor [Pseudomonas aeruginosa PAO1]	0.127303	0.415523	0.662424
15595571	Cell division protein FtsE	ftsE	PA0374					PA0374	cell division protein FtsE [Pseudomonas aeruginosa PAO1]	0.12687	0.864901	0.934568
9948262	PslG	pslG	PA2237					PA2237	PslG [Pseudomonas aeruginosa PAO1]	0.126606	0.821961	0.918434
9947662	Uncharacterized protein	PA1689						PA1689	conserved hypothetical protein [Pseudomonas aeruginosa PAO1]	0.126266	0.592334	0.779108
9950648	UDP-N-acetylmuramoyl-tripeptide--D-alanyl-D-alanine ligase (EC 6.3.2.10) (D-alanyl-D-alanine-adding enzyme)	murF	PA4416					PA4416	UDP-N-acetylmuramoylalanyl-D-glutamyl-2, 6-diaminopimelate--D-alanyl-D-alanyl ligase [Pseudomonas aeruginosa PAO1]	0.126012	0.59069	0.778248
9949685	Probable serine protease	PA3535						PA3535	probable serine protease [Pseudomonas aeruginosa PAO1]	0.121898	0.18937	0.469285
9947746	Uncharacterized protein	PA1767						PA1767	hypothetical protein PA1767 [Pseudomonas aeruginosa PAO1]	0.121356	0.563169	0.763271
9946976	Uncharacterized protein	PA1061						PA1061	conserved hypothetical protein [Pseudomonas aeruginosa PAO1]	0.121219	0.480239	0.711088
9949539	Uncharacterized protein	PA3402						PA3402	hypothetical protein PA3402 [Pseudomonas aeruginosa PAO1]	0.121017	0.402279	0.652904
9950314	Histidine kinase (EC 2.7.13.3)	PA4112						PA4112	probable sensor/response regulator hybrid [Pseudomonas aeruginosa PAO1]	0.118996	0.386027	0.640423
9949145	Uncharacterized protein	PA3040						PA3040	conserved hypothetical protein [Pseudomonas aeruginosa PAO1]	0.117943	0.935423	0.96666
9950722	Aspartyl/glutamyl-tRNA(Asn/Gln) amidotransferase subunit B (Asp/Glu-ADT subunit B) (EC 6.3.5.-)	gatB	PA4484					PA4484	Glu-tRNA(Gln) amidotransferase subunit B [Pseudomonas aeruginosa PAO1]	0.117932	0.79612	0.905394
9946767	D-alanyl-D-alanine endopeptidase (DD-endopeptidase) (EC 3.4.21.-) (Penicillin-binding protein 5) (PBP-5)	pbpG	PA0869					PA0869	D-alanyl-D-alanine-endopeptidase [Pseudomonas aeruginosa PAO1]	0.117898	0.209639	0.490156
9948059	Cyanate hydratase (Cyanase) (EC 4.2.1.104) (Cyanate hydrolase) (Cyanate lyase)	cynS	PA2052					PA2052	cyanate lyase [Pseudomonas aeruginosa PAO1]	0.113698	0.637783	0.809573
9948880	Uncharacterized protein	PA2797						PA2797	hypothetical protein PA2797 [Pseudomonas aeruginosa PAO1]	0.111722	0.695259	0.846138
9949970	Uncharacterized protein	PA3797						PA3797	conserved hypothetical protein [Pseudomonas aeruginosa PAO1]	0.111501	0.573345	0.768531
9950190	UPF0250 protein PA3998	PA3998						PA3998	conserved hypothetical protein [Pseudomonas aeruginosa PAO1]	0.111128	0.615086	0.79443
9950413	Uncharacterized protein	PA4202						PA4202	hypothetical protein PA4202 [Pseudomonas aeruginosa PAO1]	0.109703	0.648604	0.815726
9949687	Ornithine carbamoyltransferase (OTCase) (EC 2.1.3.3)	argF	PA3537					PA3537	ornithine carbamoyltransferase, anabolic [Pseudomonas aeruginosa PAO1]	0.109449	0.676818	0.833577
9949768	Uncharacterized protein	PA3611						PA3611	hypothetical protein PA3611 [Pseudomonas aeruginosa PAO1]	0.103131	0.917313	0.956682
9951435	Uncharacterized protein	PA5136						PA5136	hypothetical protein PA5136 [Pseudomonas aeruginosa PAO1]	0.102992	0.816244	0.914208
9948404	Uricase PuuD	PA2366						PA2366	uricase PuuD [Pseudomonas aeruginosa PAO1]	0.102301	0.83416	0.923324
9949728	NalD	nalD	PA3574					PA3574	NalD [Pseudomonas aeruginosa PAO1]	0.102097	0.551951	0.759858
9947090	Uncharacterized protein	PA1166						PA1166	hypothetical protein PA1166 [Pseudomonas aeruginosa PAO1]	0.0983637	0.825893	0.91978
9948257	PslB	pslB	PA2232					PA2232	PslB [Pseudomonas aeruginosa PAO1]	0.0968347	0.841488	0.926783
9949156	Dihydroorotate dehydrogenase (quinone) (EC 1.3.5.2) (DHOdehase) (DHOD) (DHODase) (Dihydroorotate oxidase)	pyrD	PA3050					PA3050	dihydroorotate dehydrogenase [Pseudomonas aeruginosa PAO1]	0.0960982	0.743384	0.877565
9950278	Probable dehydrogenase	PA4079						PA4079	probable dehydrogenase [Pseudomonas aeruginosa PAO1]	0.0960824	0.683139	0.837637
9947550	Dihydrolipoyl dehydrogenase (EC 1.8.1.4) (Dihydrolipoamide dehydrogenase) (E3 component of 2-oxoglutarate dehydrogenase complex) (Glycine oxidation system L-factor) (LPD-GLC)	lpdG	PA1587					PA1587	lipoamide dehydrogenase-glc [Pseudomonas aeruginosa PAO1]	0.09578	0.889019	0.944578
9949998	S-adenosylmethionine:tRNA ribosyltransferase-isomerase (EC 2.4.99.17) (Queuosine biosynthesis protein QueA)	queA	PA3824					PA3824	S-adenosylmethionine:trna ribosyltransferase-isomerase [Pseudomonas aeruginosa PAO1]	0.0942932	0.540824	0.751109
9949862	Uncharacterized protein	PA3697						PA3697	hypothetical protein PA3697 [Pseudomonas aeruginosa PAO1]	0.0939419	0.573865	0.768531
9951409	Esterase EstA (EC 3.1.1.1) (Autotransporter esterase EstA)	estA	papA	PA5112				PA5112	esterase EstA [Pseudomonas aeruginosa PAO1]	0.0928821	0.989742	0.99692
9950457	30S ribosomal protein S11	rpsK	PA4240					PA4240	30S ribosomal protein S11 [Pseudomonas aeruginosa PAO1]	0.0923002	0.673598	0.831842
9946247	UPF0001 protein PA0394	PA0394						PA0394	conserved hypothetical protein [Pseudomonas aeruginosa PAO1]	0.0907334	0.674842	0.832012
9951566	Transcriptional regulatory protein AlgQ (Alginate regulatory protein AlgR2)	algQ	algR2	PA5255				PA5255	Alginate regulatory protein AlgQ [Pseudomonas aeruginosa PAO1]	0.0903721	0.905191	0.949559
9950243	GTP cyclohydrolase-2 (EC 3.5.4.25) (GTP cyclohydrolase II)	ribA	PA4047					PA4047	GTP cyclohydrolase II [Pseudomonas aeruginosa PAO1]	0.0894153	0.479055	0.710458
9951433	Probable carboxyl-terminal protease	PA5134						PA5134	probable carboxyl-terminal protease [Pseudomonas aeruginosa PAO1]	0.0894153	0.481025	0.711088
9946836	Cysteine synthase B (CSase B) (EC 2.5.1.47) (O-acetylserine (thiol)-lyase B) (OAS-TL B) (O-acetylserine sulfhydrylase B)	cysM	PA0932					PA0932	cysteine synthase B [Pseudomonas aeruginosa PAO1]	0.0893348	0.689778	0.842943
9949962	Putative copper transport outer membrane porin OprC	oprC	PA3790					PA3790	Putative copper transport outer membrane porin OprC precursor [Pseudomonas aeruginosa PAO1]	0.0885402	0.329578	0.593543
9950601	Uncharacterized protein	PA4372						PA4372	hypothetical protein PA4372 [Pseudomonas aeruginosa PAO1]	0.0881853	0.801848	0.907557
9947546	Succinate dehydrogenase flavoprotein subunit (EC 1.3.5.1)	sdhA	PA1583					PA1583	succinate dehydrogenase (A subunit) [Pseudomonas aeruginosa PAO1]	0.0875697	0.757571	0.88502
9946427	Uncharacterized protein	PA0558						PA0558	conserved hypothetical protein [Pseudomonas aeruginosa PAO1]	0.0867135	0.467392	0.702533
9946546	Tyrosine--tRNA ligase 2 (EC 6.1.1.1) (Tyrosyl-tRNA synthetase 2) (TyrRS 2)	tyrS2	PA0668					PA0668	tyrosyl-tRNA synthetase 2 [Pseudomonas aeruginosa PAO1]	0.0863464	0.74073	0.876308
9949461	Probable short chain dehydrogenase	PA3330						PA3330	probable short chain dehydrogenase [Pseudomonas aeruginosa PAO1]	0.0863063	0.743261	0.877565
9949487	Uncharacterized protein	PA3354						PA3354	hypothetical protein PA3354 [Pseudomonas aeruginosa PAO1]	0.0860985	0.710155	0.853705
9946177	UPF0339 protein PA0329	PA0329						PA0329	conserved hypothetical protein [Pseudomonas aeruginosa PAO1]	0.0839804	0.960132	0.98242
9947036	Uncharacterized protein	PA1117						PA1117	hypothetical protein PA1117 [Pseudomonas aeruginosa PAO1]	0.0826517	0.978475	0.991493
9950922	TPR repeat-containing protein PA4667	PA4667						PA4667	hypothetical protein PA4667 [Pseudomonas aeruginosa PAO1]	0.0824791	0.8102	0.911765
9948694	High frequency lysogenization protein HflD homolog	hflD	PA2627					PA2627	conserved hypothetical protein [Pseudomonas aeruginosa PAO1]	0.0815498	0.752834	0.881667
9950929	Ribosome-binding ATPase YchF	ychF	PA4673					PA4673	conserved hypothetical protein [Pseudomonas aeruginosa PAO1]	0.0813759	0.846983	0.928809
9949331	Probable permease of ABC transporter	PA3211						PA3211	probable permease of ABC transporter [Pseudomonas aeruginosa PAO1]	0.0801381	0.47532	0.707897
9950672	Cell division protein ZapE (Z ring-associated protein ZapE)	zapE	PA4438					PA4438	conserved hypothetical protein [Pseudomonas aeruginosa PAO1]	0.0798722	0.589662	0.778196
9950554	Pyruvate kinase (EC 2.7.1.40)	pykA	PA4329					PA4329	pyruvate kinase II [Pseudomonas aeruginosa PAO1]	0.0798553	0.831379	0.92297
9950175	Apolipoprotein N-acyltransferase (ALP N-acyltransferase) (EC 2.3.1.-) (Copper homeostasis protein CutE homolog)	lnt	cutE	PA3984				PA3984	apolipoprotein N-acyltransferase [Pseudomonas aeruginosa PAO1]	0.079623	0.862837	0.934513
9950700	Nitrogen regulatory protein (Enzyme IIA-NTR) [Includes: Phosphotransferase enzyme IIA component (EC 2.7.1.-) (PTS system EIIA component)]	ptsN	PA4464					PA4464	nitrogen regulatory IIA protein [Pseudomonas aeruginosa PAO1]	0.0796178	0.833952	0.923324
9950085	Peptide chain release factor 3 (RF-3)	prfC	PA3903					PA3903	peptide chain release factor 3 [Pseudomonas aeruginosa PAO1]	0.0794783	0.296546	0.563415
9947548	2-oxoglutarate dehydrogenase (E1 subunit)	sucA	PA1585					PA1585	2-oxoglutarate dehydrogenase (E1 subunit) [Pseudomonas aeruginosa PAO1]	0.079124	0.855832	0.930733
9949988	Cysteine desulfurase IscS (EC 2.8.1.7)	iscS	PA3814					PA3814	L-cysteine desulfurase (pyridoxal phosphate-dependent) [Pseudomonas aeruginosa PAO1]	0.0788751	0.574082	0.768531
9946256	Aspartate carbamoyltransferase (EC 2.1.3.2) (Aspartate transcarbamylase) (ATCase)	pyrB	PA0402					PA0402	aspartate carbamoyltransferase [Pseudomonas aeruginosa PAO1]	0.0750888	0.894894	0.945767
9949983	2Fe-2S ferredoxin	fdx	PA3809					PA3809	ferredoxin (2Fe-2S) [Pseudomonas aeruginosa PAO1]	0.0741077	0.749224	0.879558
9948994	Uncharacterized protein	PA2902						PA2902	hypothetical protein PA2902 [Pseudomonas aeruginosa PAO1]	0.0740088	0.899771	0.94739
9951654	Uncharacterized protein	PA5335						PA5335	conserved hypothetical protein [Pseudomonas aeruginosa PAO1]	0.0729476	0.503807	0.724331
9951798	Uncharacterized protein	PA5466						PA5466	hypothetical protein PA5466 [Pseudomonas aeruginosa PAO1]	0.0725339	0.272823	0.548809
9948693	tRNA-specific 2-thiouridylase MnmA (EC 2.8.1.13)	mnmA	trmU	PA2626				PA2626	tRNA methyltransferase [Pseudomonas aeruginosa PAO1]	0.0717195	0.608434	0.789146
9949287	Uncharacterized protein	PA3170						PA3170	conserved hypothetical protein [Pseudomonas aeruginosa PAO1]	0.0714789	0.429155	0.673292
9951506	AmgR	amgR	PA5200					PA5200	AmgR [Pseudomonas aeruginosa PAO1]	0.0709424	0.871558	0.935765
9946800	N-succinylarginine dihydrolase (EC 3.5.3.23)	astB	aruB	PA0899				PA0899	succinylarginine dihydrolase [Pseudomonas aeruginosa PAO1]	0.0703986	0.837127	0.924428
9950981	Probable aminotransferase	PA4722						PA4722	probable aminotransferase [Pseudomonas aeruginosa PAO1]	0.0702279	0.901451	0.947607
9950702	Phosphocarrier protein HPr (EC 2.7.11.-) (Histidine-containing protein)	ptsH	PA4466					PA4466	probable phosphoryl carrier protein [Pseudomonas aeruginosa PAO1]	0.0701058	0.85113	0.929782
9949900	Uncharacterized protein	PA3733						PA3733	hypothetical protein PA3733 [Pseudomonas aeruginosa PAO1]	0.0691912	0.613915	0.793351
9946418	Hydroxypyruvate isomerase (EC 5.3.1.22)	PA0550						PA0550	conserved hypothetical protein [Pseudomonas aeruginosa PAO1]	0.0685992	0.315551	0.582955
9950958	Penicillin-binding protein 1B (PBP-1b) (PBP1b) (Murein polymerase)	mrcB	PA4700					PA4700	penicillin-binding protein 1B [Pseudomonas aeruginosa PAO1]	0.0684848	0.444082	0.685279
9948945	Probable ATP-binding component of ABC transporter	PA2857						PA2857	probable ATP-binding component of ABC transporter [Pseudomonas aeruginosa PAO1]	0.067059	0.668823	0.828919
9949813	Ditrans,polycis-undecaprenyl-diphosphate synthase ((2E,6E)-farnesyl-diphosphate specific) (EC 2.5.1.31) (Ditrans,polycis-undecaprenylcistransferase) (Undecaprenyl diphosphate synthase) (UDS) (Undecaprenyl pyrophosphate synthase) (UPP synthase)	uppS	PA3652					PA3652	undecaprenyl pyrophosphate synthetase [Pseudomonas aeruginosa PAO1]	0.0668865	0.396596	0.650253
9949836	Glycerol-3-phosphate acyltransferase (GPAT) (EC 2.3.1.15)	plsB	PA3673					PA3673	glycerol-3-phosphate acyltransferase [Pseudomonas aeruginosa PAO1]	0.0668022	0.877796	0.938634
9947745	Uncharacterized protein	PA1766						PA1766	hypothetical protein PA1766 [Pseudomonas aeruginosa PAO1]	0.0662159	0.401602	0.652904
9946731	Acetate kinase (EC 2.7.2.1) (Acetokinase)	ackA	PA0836					PA0836	acetate kinase [Pseudomonas aeruginosa PAO1]	0.0650931	0.542561	0.752195
9951127	Phosphoribosylamine--glycine ligase (EC 6.3.4.13) (GARS) (Glycinamide ribonucleotide synthetase) (Phosphoribosylglycinamide synthetase)	purD	PA4855					PA4855	phosphoribosylamine--glycine ligase [Pseudomonas aeruginosa PAO1]	0.0637941	0.384516	0.638839
9946526	Anthranilate synthase component 2 (AS) (ASII) (EC 4.1.3.27) (Anthranilate synthase, GATase component) (Anthranilate synthase, glutamine amidotransferase component)	trpG	PA0649					PA0649	anthranilate synthase component II [Pseudomonas aeruginosa PAO1]	0.0634768	0.330387	0.594546
9950199	Gamma-glutamyl phosphate reductase (GPR) (EC 1.2.1.41) (Glutamate-5-semialdehyde dehydrogenase) (Glutamyl-gamma-semialdehyde dehydrogenase) (GSA dehydrogenase)	proA	PA4007					PA4007	gamma-glutamyl phosphate reductase [Pseudomonas aeruginosa PAO1]	0.0624043	0.745091	0.877723
9947077	Ribonucleoside-diphosphate reductase subunit beta (EC 1.17.4.1)	nrdB	PA1155					PA1155	NrdB, tyrosyl radical-harboring component of class Ia ribonucleotide reductase [Pseudomonas aeruginosa PAO1]	0.0619902	0.807765	0.910326
9950376	Second ferric pyoverdine receptor FpvB	fpvB	PA4168					PA4168	second ferric pyoverdine receptor FpvB [Pseudomonas aeruginosa PAO1]	0.0610991	0.502769	0.724331
9950249	6,7-dimethyl-8-ribityllumazine synthase (DMRL synthase) (LS) (Lumazine synthase) (EC 2.5.1.78)	ribH	ribE	PA4053				PA4053	6,7-dimethyl-8-ribityllumazine synthase [Pseudomonas aeruginosa PAO1]	0.0607949	0.887386	0.944578
9948612	Probable acyl-CoA thiolase	PA2553						PA2553	probable acyl-CoA thiolase [Pseudomonas aeruginosa PAO1]	0.0599382	0.794027	0.905394
9948906	Probable glutathione S-transferase	PA2821						PA2821	probable glutathione S-transferase [Pseudomonas aeruginosa PAO1]	0.059578	0.427407	0.672406
9951662	Uncharacterized protein	PA5343						PA5343	hypothetical protein PA5343 [Pseudomonas aeruginosa PAO1]	0.0594051	0.940106	0.968831
9948928	Probable enoyl-CoA hydratase/isomerase	PA2841						PA2841	probable enoyl-CoA hydratase/isomerase [Pseudomonas aeruginosa PAO1]	0.0592698	0.559456	0.761181
9949077	Phosphotyrosine protein phosphatase	ptpA	PA2978					PA2978	phosphotyrosine protein phosphatase [Pseudomonas aeruginosa PAO1]	0.0566276	0.536765	0.747229
9951216	Ribonuclease R (RNase R) (EC 3.1.13.1)	rnr	PA4937					PA4937	exoribonuclease RNase R [Pseudomonas aeruginosa PAO1]	0.0560103	0.846124	0.92873
9946483	Anthranilate synthase component 1 (AS) (ASI) (EC 4.1.3.27)	trpE	PA0609					PA0609	anthranilate synthetase component I [Pseudomonas aeruginosa PAO1]	0.0558124	0.918123	0.956682
9949288	Ubiquinone biosynthesis O-methyltransferase (2-polyprenyl-6-hydroxyphenol methylase) (EC 2.1.1.222) (3-demethylubiquinone 3-O-methyltransferase) (EC 2.1.1.64)	ubiG	PA3171					PA3171	3-demethylubiquinone-9 3-methyltransferase [Pseudomonas aeruginosa PAO1]	0.0536462	0.62823	0.803876
9951656	DNA-directed RNA polymerase subunit omega (RNAP omega subunit) (EC 2.7.7.6) (RNA polymerase omega subunit) (Transcriptase subunit omega)	rpoZ	PA5337					PA5337	RNA polymerase omega subunit [Pseudomonas aeruginosa PAO1]	0.0532624	0.778992	0.896993
9951343	Uncharacterized protein	PA5052						PA5052	hypothetical protein PA5052 [Pseudomonas aeruginosa PAO1]	0.0531093	0.977268	0.991382
9946529	Cyclic AMP receptor-like protein	vfr	PA0652					PA0652	transcriptional regulator Vfr [Pseudomonas aeruginosa PAO1]	0.0529294	0.523345	0.737683
9946445	Uncharacterized protein	PA0575						PA0575	conserved hypothetical protein [Pseudomonas aeruginosa PAO1]	0.0527506	0.569445	0.767363
9950656	Uncharacterized protein	PA4423						PA4423	conserved hypothetical protein [Pseudomonas aeruginosa PAO1]	0.0522413	0.800734	0.906998
9947770	Uncharacterized protein	PA1789						PA1789	hypothetical protein PA1789 [Pseudomonas aeruginosa PAO1]	0.0516751	0.629011	0.804058
9948641	Tryptophan 2,3-dioxygenase (TDO) (EC 1.13.11.11) (Tryptamin 2,3-dioxygenase) (Tryptophan oxygenase) (TO) (TRPO) (Tryptophan pyrrolase) (Tryptophanase)	kynA	PA2579					PA2579	L-Tryptophan:oxygen 2,3-oxidoreductase (decyclizing) KynA [Pseudomonas aeruginosa PAO1]	0.0507803	0.872157	0.935983
9950336	Uncharacterized protein	PA4132						PA4132	conserved hypothetical protein [Pseudomonas aeruginosa PAO1]	0.0498506	0.986537	0.996144
9951552	Delta-aminolevulinic acid dehydratase (ALAD) (ALADH) (EC 4.2.1.24) (Porphobilinogen synthase)	hemB	PA5243					PA5243	delta-aminolevulinic acid dehydratase [Pseudomonas aeruginosa PAO1]	0.0493509	0.277286	0.55147
9951256	Phosphomethylpyrimidine synthase (EC 4.1.99.17) (Hydroxymethylpyrimidine phosphate synthase) (HMP-P synthase) (HMP-phosphate synthase) (HMPP synthase) (Thiamine biosynthesis protein ThiC)	thiC	PA4973					PA4973	thiamin biosynthesis protein ThiC [Pseudomonas aeruginosa PAO1]	0.0493199	0.761854	0.888265
9951624	Leucine-responsive regulatory protein	lrp	PA5308					PA5308	leucine-responsive regulatory protein [Pseudomonas aeruginosa PAO1]	0.0475451	0.900025	0.94739
9949971	Probable aminotransferase	PA3798						PA3798	probable aminotransferase [Pseudomonas aeruginosa PAO1]	0.0471103	0.497398	0.722002
9951246	DNA topoisomerase 4 subunit A (EC 5.99.1.3) (Topoisomerase IV subunit A)	parC	PA4964					PA4964	topoisomerase IV subunit A [Pseudomonas aeruginosa PAO1]	0.0469612	0.574967	0.768531
9946796	Succinylornithine transaminase/acetylornithine aminotransferase (ACOAT) (SOAT) (Succinylornithine aminotransferase) (EC 2.6.1.11) (EC 2.6.1.81)	aruC	argD	astC	PA0895			PA0895	N-succinylglutamate 5-semialdehyde dehydrogenase [Pseudomonas aeruginosa PAO1]	0.0451801	0.741083	0.876308
9946162	D-3-phosphoglycerate dehydrogenase	serA	PA0316					PA0316	D-3-phosphoglycerate dehydrogenase [Pseudomonas aeruginosa PAO1]	0.0442368	0.390445	0.642413
9947723	Uncharacterized protein	PA1746						PA1746	hypothetical protein PA1746 [Pseudomonas aeruginosa PAO1]	0.0439655	0.420987	0.668427
9951617	Probable transcriptional regulator	PA5301						PA5301	probable transcriptional regulator [Pseudomonas aeruginosa PAO1]	0.043669	0.984584	0.995121
9951225	tRNA dimethylallyltransferase (EC 2.5.1.75) (Dimethylallyl diphosphate:tRNA dimethylallyltransferase) (DMAPP:tRNA dimethylallyltransferase) (DMATase) (Isopentenyl-diphosphate:tRNA isopentenyltransferase) (IPP transferase) (IPPT) (IPTase)	miaA	PA4945					PA4945	delta 2-isopentenylpyrophosphate transferase [Pseudomonas aeruginosa PAO1]	0.0435152	0.765121	0.890755
9947511	Probable ferredoxin	PA1551						PA1551	probable ferredoxin [Pseudomonas aeruginosa PAO1]	0.0431093	0.723904	0.864073
9951342	Arginine--tRNA ligase (EC 6.1.1.19) (Arginyl-tRNA synthetase) (ArgRS)	argS	PA5051					PA5051	arginyl-tRNA synthetase [Pseudomonas aeruginosa PAO1]	0.0427325	0.633255	0.807298
9945842	Quinone oxidoreductase (EC 1.6.5.5) (NADPH:quinone reductase)	qor	PA0023					PA0023	quinone oxidoreductase [Pseudomonas aeruginosa PAO1]	0.0414255	0.773452	0.893565
9951355	Ubiquinone/menaquinone biosynthesis C-methyltransferase UbiE (EC 2.1.1.163) (EC 2.1.1.201) (2-methoxy-6-polyprenyl-1,4-benzoquinol methylase) (Demethylmenaquinone methyltransferase)	ubiE	PA5063					PA5063	ubiquinone biosynthesis methyltransferase UbiE [Pseudomonas aeruginosa PAO1]	0.041332	0.547387	0.755778
9951859	Probable glutamine synthetase	PA5522						PA5522	probable glutamine synthetase [Pseudomonas aeruginosa PAO1]	0.0411082	0.446777	0.687057
9946136	Agmatine deiminase (EC 3.5.3.12) (Agmatine iminohydrolase)	aguA	PA0292					PA0292	agmatine deiminase [Pseudomonas aeruginosa PAO1]	0.0408583	0.888421	0.944578
9950704	Superoxide dismutase [Mn] (EC 1.15.1.1)	sodA	PA4468					PA4468	superoxide dismutase [Pseudomonas aeruginosa PAO1]	0.039804	0.398101	0.651363
9947656	Acireductone dioxygenase (1,2-dihydroxy-3-keto-5-methylthiopentene dioxygenase) (DHK-MTPene dioxygenase) (Acireductone dioxygenase (Fe(2+)-requiring)) (ARD') (Fe-ARD) (EC 1.13.11.54) (Acireductone dioxygenase (Ni(2+)-requiring)) (ARD) (Ni-ARD) (EC 1.13.11.53)	mtnD	PA1684					PA1684	1,2-dihydroxy-3-keto-5-methylthiopentene dioxygenase MtnD [Pseudomonas aeruginosa PAO1]	0.0397736	0.875019	0.936925
9951344	ATP-dependent protease subunit HslV (EC 3.4.25.2)	hslV	PA5053					PA5053	heat shock protein HslV [Pseudomonas aeruginosa PAO1]	0.0387647	0.670771	0.829592
9950166	Thiamine-phosphate synthase (TP synthase) (TPS) (EC 2.5.1.3) (Thiamine-phosphate pyrophosphorylase) (TMP pyrophosphorylase) (TMP-PPase)	thiE	PA3976					PA3976	thiamin-phosphate pyrophosphorylase [Pseudomonas aeruginosa PAO1]	0.0378028	0.356065	0.614865
9946441	Uncharacterized protein	PA0571						PA0571	hypothetical protein PA0571 [Pseudomonas aeruginosa PAO1]	0.0376863	0.554031	0.760504
9947731	Uncharacterized protein	PA1753						PA1753	conserved hypothetical protein [Pseudomonas aeruginosa PAO1]	0.0376177	0.732635	0.870124
9949393	Probable TonB-dependent receptor	PA3268						PA3268	probable TonB-dependent receptor [Pseudomonas aeruginosa PAO1]	0.03761	0.798628	0.906301
9951587	Nucleoside diphosphate kinase regulator	rnk	PA5274					PA5274	nucleoside diphosphate kinase regulator [Pseudomonas aeruginosa PAO1]	0.0369509	0.723019	0.864073
9951292	Uncharacterized protein	PA5006						PA5006	hypothetical protein PA5006 [Pseudomonas aeruginosa PAO1]	0.0367387	0.327846	0.592229
9950482	30S ribosomal protein S10	rpsJ	PA4264					PA4264	30S ribosomal protein S10 [Pseudomonas aeruginosa PAO1]	0.0352804	0.596498	0.783277
9949676	Dihydroorotase (DHOase) (EC 3.5.2.3)	pyrC	PA3527					PA3527	dihydroorotase [Pseudomonas aeruginosa PAO1]	0.0333688	0.924599	0.961241
9949219	Amidophosphoribosyltransferase (ATase) (EC 2.4.2.14) (Glutamine phosphoribosylpyrophosphate amidotransferase) (GPATase)	purF	PA3108					PA3108	amidophosphoribosyltransferase [Pseudomonas aeruginosa PAO1]	0.0327722	0.769679	0.89254
9951892	Bifunctional protein GlmU [Includes: UDP-N-acetylglucosamine pyrophosphorylase (EC 2.7.7.23) (N-acetylglucosamine-1-phosphate uridyltransferase); Glucosamine-1-phosphate N-acetyltransferase (EC 2.3.1.157)]	glmU	PA5552					PA5552	glucosamine-1-phosphate acetyltransferase/N-acetylglucosamine-1-phosphate uridyltransferase [Pseudomonas aeruginosa PAO1]	0.0324738	0.604831	0.788736
193506764	Uncharacterized protein	PA3455						PA3455	Chain A, Crystal Structure Of Putative Polyphosphate Kinase 2 From Pseudomonas Aeruginosa Pa01	0.0318767	0.546922	0.755778
9946214	Phosphopantetheine adenylyltransferase (EC 2.7.7.3) (Dephospho-CoA pyrophosphorylase) (Pantetheine-phosphate adenylyltransferase) (PPAT)	coaD	PA0363					PA0363	phosphopantetheine adenylyltransferase [Pseudomonas aeruginosa PAO1]	0.0310338	0.858307	0.931581
9951291	Probable carbamoyl transferase	PA5005						PA5005	probable carbamoyl transferase [Pseudomonas aeruginosa PAO1]	0.0306716	0.599579	0.785139
9946254	Probable cystathionine gamma-lyase	PA0400						PA0400	probable cystathionine gamma-lyase [Pseudomonas aeruginosa PAO1]	0.0291141	0.880074	0.938785
9945819	Chromosomal replication initiator protein DnaA	dnaA	PA0001					PA0001	chromosomal replication initiator protein DnaA [Pseudomonas aeruginosa PAO1]	0.0289931	0.942002	0.969938
9951335	Penicillin-binding protein 1A (PBP-1a) (PBP1a) [Includes: Penicillin-insensitive transglycosylase (EC 2.4.2.-) (Peptidoglycan TGase); Penicillin-sensitive transpeptidase (EC 3.4.-.-) (DD-transpeptidase)]	mrcA	ponA	PA5045				PA5045	penicillin-binding protein 1A [Pseudomonas aeruginosa PAO1]	0.0282904	0.694697	0.845944
9948424	Uncharacterized protein	PA2384						PA2384	hypothetical protein PA2384 [Pseudomonas aeruginosa PAO1]	0.0282638	0.563482	0.763271
9948818	Phenylalanine--tRNA ligase alpha subunit (EC 6.1.1.20) (Phenylalanyl-tRNA synthetase alpha subunit) (PheRS)	pheS	PA2740					PA2740	phenylalanyl-tRNA synthetase, alpha-subunit [Pseudomonas aeruginosa PAO1]	0.0256809	0.810025	0.911765
9948822	Threonine--tRNA ligase (EC 6.1.1.3) (Threonyl-tRNA synthetase) (ThrRS)	thrS	PA2744					PA2744	threonyl-tRNA synthetase [Pseudomonas aeruginosa PAO1]	0.0246402	0.83486	0.923667
9950987	Poly(A) polymerase I (PAP I) (EC 2.7.7.19)	pcnB	PA4727					PA4727	poly(A) polymerase [Pseudomonas aeruginosa PAO1]	0.0229919	0.809191	0.911498
9949079	UPF0434 protein PA2980	PA2980						PA2980	conserved hypothetical protein [Pseudomonas aeruginosa PAO1]	0.0225964	0.640457	0.810842
15599505	Methyl-accepting chemotaxis protein PctA	pctA	PA4309					PA4309	chemotactic transducer PctA [Pseudomonas aeruginosa PAO1]	0.0221001	0.554728	0.761018
9946223	Uncharacterized protein	PA0371						PA0371	hypothetical protein PA0371 [Pseudomonas aeruginosa PAO1]	0.0212725	0.757472	0.88502
9950866	Probable oxidoreductase	PA4615						PA4615	probable oxidoreductase [Pseudomonas aeruginosa PAO1]	0.0202978	0.797067	0.905394
9948700	Uncharacterized protein	PA2633						PA2633	hypothetical protein PA2633 [Pseudomonas aeruginosa PAO1]	0.0202545	0.5089	0.726428
9949348	Peptidyl-prolyl cis-trans isomerase A (PPIase A) (EC 5.2.1.8) (Cyclophilin A) (Rotamase A)	ppiA	cypH	PA3227				PA3227	peptidyl-prolyl cis-trans isomerase A [Pseudomonas aeruginosa PAO1]	0.0189081	0.43849	0.679887
9946143	Putrescine aminotransferase	spuC	PA0299					PA0299	putrescine aminotransferase [Pseudomonas aeruginosa PAO1]	0.0182583	0.873438	0.936506
9946656	Signal peptidase I (SPase I) (EC 3.4.21.89) (Leader peptidase I)	lepB	PA0768					PA0768	signal peptidase I [Pseudomonas aeruginosa PAO1]	0.0172478	0.796243	0.905394
9946243	Homoserine O-acetyltransferase (EC 2.3.1.31) (Homoserine O-trans-acetylase) (HTA) (Homoserine transacetylase)	metX	PA0390					PA0390	homoserine O-acetyltransferase [Pseudomonas aeruginosa PAO1]	0.0165767	0.51813	0.733397
9946282	Multidrug resistance protein MexB (Multidrug-efflux transporter MexB)	mexB	PA0426					PA0426	Resistance-Nodulation-Cell Division (RND) multidrug efflux transporter MexB [Pseudomonas aeruginosa PAO1]	0.01484	0.991074	0.99741
9951885	Uncharacterized protein	PA5545						PA5545	conserved hypothetical protein [Pseudomonas aeruginosa PAO1]	0.0147808	0.399237	0.651557
9949910	50S ribosomal protein L19	rplS	PA3742					PA3742	50S ribosomal protein L19 [Pseudomonas aeruginosa PAO1]	0.0147276	0.892968	0.944578
9949938	Probable metallo-oxidoreductase	PA3768						PA3768	probable metallo-oxidoreductase [Pseudomonas aeruginosa PAO1]	0.0145201	0.362312	0.621219
9945942	Uncharacterized protein	PA0115						PA0115	conserved hypothetical protein [Pseudomonas aeruginosa PAO1]	0.0141705	0.566001	0.765099
9949851	Phosphoenolpyruvate carboxylase (PEPC) (PEPCase) (EC 4.1.1.31)	ppc	PA3687					PA3687	phosphoenolpyruvate carboxylase [Pseudomonas aeruginosa PAO1]	0.0137696	0.881224	0.938886
9947411	Chemotaxis response regulator protein-glutamate methylesterase of group 1 operon (EC 3.1.1.61)	cheB1	PA1459					PA1459	probable methyltransferase [Pseudomonas aeruginosa PAO1]	0.0136239	0.987284	0.996144
9950165	Phosphomethylpyrimidine kinase	thiD	PA3975					PA3975	phosphomethylpyrimidine kinase [Pseudomonas aeruginosa PAO1]	0.0126898	0.98939	0.99692
9951909	Membrane protein insertase YidC (Foldase YidC) (Membrane integrase YidC) (Membrane protein YidC)	yidC	PA5568					PA5568	conserved hypothetical protein [Pseudomonas aeruginosa PAO1]	0.0120377	0.608655	0.789146
9951843	Uncharacterized protein	PA5507						PA5507	hypothetical protein PA5507 [Pseudomonas aeruginosa PAO1]	0.0116116	0.664686	0.827703
9946672	Bifunctional protein PutA	putA	PA0782					PA0782	proline dehydrogenase PutA [Pseudomonas aeruginosa PAO1]	0.0110948	0.891413	0.944578
9949987	Iron-sulfur cluster assembly scaffold protein IscU	iscU	PA3813					PA3813	probable iron-binding protein IscU [Pseudomonas aeruginosa PAO1]	0.0109931	0.811762	0.912218
9949625	Deoxycytidine triphosphate deaminase (dCTP deaminase) (EC 3.5.4.13)	dcd	PA3480					PA3480	probable deoxycytidine triphosphate deaminase [Pseudomonas aeruginosa PAO1]	0.010618	0.632883	0.807259
9947011	B-type flagellar hook-associated protein 2 (HAP2) (Filament cap protein) (Flagellar cap protein)	fliD	PA1094					PA1094	flagellar capping protein FliD [Pseudomonas aeruginosa PAO1]	0.0101011	0.62836	0.803876
9950697	Probable ATP-binding component of ABC transporter	PA4461						PA4461	probable ATP-binding component of ABC transporter [Pseudomonas aeruginosa PAO1]	0.00997121	0.960121	0.98242
9951574	Argininosuccinate lyase (ASAL) (EC 4.3.2.1) (Arginosuccinase)	argH	PA5263					PA5263	argininosuccinate lyase [Pseudomonas aeruginosa PAO1]	0.009957	0.940104	0.968831
9949162	Uncharacterized protein	PA3056						PA3056	hypothetical protein PA3056 [Pseudomonas aeruginosa PAO1]	0.00993764	0.623572	0.801008
9946227	Cell division protein FtsX	ftsX	PA0375					PA0375	cell division protein FtsX [Pseudomonas aeruginosa PAO1]	0.00867505	0.604881	0.788736
9950167	Glutamate-1-semialdehyde 2,1-aminomutase (GSA) (EC 5.4.3.8) (Glutamate-1-semialdehyde aminotransferase) (GSA-AT)	hemL	PA3977					PA3977	glutamate-1-semialdehyde 2,1-aminomutase [Pseudomonas aeruginosa PAO1]	0.00858415	0.717071	0.859317
9949253	Aspartate aminotransferase (AspAT) (EC 2.6.1.1) (Transaminase A)	aspC	PA3139					PA3139	probable amino acid aminotransferase [Pseudomonas aeruginosa PAO1]	0.00809076	0.990728	0.99741
9946527	Anthranilate phosphoribosyltransferase (EC 2.4.2.18)	trpD	PA0650					PA0650	anthranilate phosphoribosyltransferase [Pseudomonas aeruginosa PAO1]	0.00773005	0.522196	0.736852
9949972	GTPase Der (GTP-binding protein EngA)	der	engA	PA3799				PA3799	conserved hypothetical protein [Pseudomonas aeruginosa PAO1]	0.00713827	0.650261	0.815763
9950815	Octaprenyl-diphosphate synthase	ispB	PA4569					PA4569	octaprenyl-diphosphate synthase [Pseudomonas aeruginosa PAO1]	0.0063971	0.697127	0.847537
9949177	Uncharacterized protein	PA3070						PA3070	conserved hypothetical protein [Pseudomonas aeruginosa PAO1]	0.00515371	0.422693	0.670234
9949810	Putative zinc metalloprotease PA3649 (EC 3.4.24.-)	PA3649						PA3649	conserved hypothetical protein [Pseudomonas aeruginosa PAO1]	0.0038834	0.854282	0.929962
9948619	Uncharacterized protein	PA2559						PA2559	hypothetical protein PA2559 [Pseudomonas aeruginosa PAO1]	0.00273064	0.70885	0.853591
9946843	Uncharacterized protein	PA0938						PA0938	hypothetical protein PA0938 [Pseudomonas aeruginosa PAO1]	0.00268107	0.956812	0.981064
9946330	Uncharacterized protein	PA0469						PA0469	hypothetical protein PA0469 [Pseudomonas aeruginosa PAO1]	0.00265734	0.706723	0.85359
9951768	Glucose-6-phosphate 1-dehydrogenase (G6PD) (EC 1.1.1.49)	zwf	PA5439					PA5439	probable glucose-6-phosphate dehydrogenase [Pseudomonas aeruginosa PAO1]	0.00200883	0.3048	0.570781
9951764	Probable transcarboxylase subunit	PA5435						PA5435	probable transcarboxylase subunit [Pseudomonas aeruginosa PAO1]	0.00143098	0.845592	0.92873
15596347	Pyocin-S2 (EC 3.1.-.-) (Killer protein)	pys2	PA1150					PA1150	pyocin S2 [Pseudomonas aeruginosa PAO1]	0.00133479	0.932192	0.965752
9951542	Uncharacterized protein	PA5233						PA5233	hypothetical protein PA5233 [Pseudomonas aeruginosa PAO1]	0.000678674	0.525428	0.738854
9950487	DNA-directed RNA polymerase subunit beta' (RNAP subunit beta') (EC 2.7.7.6) (RNA polymerase subunit beta') (Transcriptase subunit beta')	rpoC	PA4269					PA4269	DNA-directed RNA polymerase beta* chain [Pseudomonas aeruginosa PAO1]	0.000412302	0.747903	0.878507
9949234	Probable transcriptional regulator	PA3122						PA3122	probable transcriptional regulator [Pseudomonas aeruginosa PAO1]	0.000138413	0.508081	0.725698
9951875	RNA polymerase-binding transcription factor DksA	dksA	PA5536					PA5536	conserved hypothetical protein [Pseudomonas aeruginosa PAO1]	0	1	1
9948786	Probable periplasmic spermidine/putrescine-binding protein	PA2711						PA2711	probable periplasmic spermidine/putrescine-binding protein [Pseudomonas aeruginosa PAO1]	0	0.285767	0.556436
9947801	DNA polymerase III, epsilon chain	dnaQ	PA1816					PA1816	DNA polymerase III, epsilon chain [Pseudomonas aeruginosa PAO1]	-0.000218323	0.797253	0.905394
9951550	Exopolyphosphatase (ExopolyPase) (EC 3.6.1.11) (Metaphosphatase)	ppx	PA5241					PA5241	exopolyphosphatase [Pseudomonas aeruginosa PAO1]	-0.000390173	0.98716	0.996144
9950646	UDP-N-acetylmuramoylalanine--D-glutamate ligase (EC 6.3.2.9) (D-glutamic acid-adding enzyme) (UDP-N-acetylmuramoyl-L-alanyl-D-glutamate synthetase)	murD	PA4414					PA4414	UDP-N-acetylmuramoylalanine--D-glutamate ligase [Pseudomonas aeruginosa PAO1]	-0.00155839	0.447519	0.687057
9949202	Uncharacterized protein	PA3093						PA3093	hypothetical protein PA3093 [Pseudomonas aeruginosa PAO1]	-0.00170881	0.381949	0.637301
9949277	Integration host factor subunit beta (IHF-beta)	ihfB	himD	PA3161				PA3161	integration host factor beta subunit [Pseudomonas aeruginosa PAO1]	-0.00221099	0.515991	0.732124
9947502	Adenine phosphoribosyltransferase (APRT) (EC 2.4.2.7)	apt	PA1543					PA1543	adenine phosphoribosyltransferase [Pseudomonas aeruginosa PAO1]	-0.00289644	0.5664	0.765099
9946404	Uncharacterized protein	PA0537						PA0537	conserved hypothetical protein [Pseudomonas aeruginosa PAO1]	-0.00335907	0.803015	0.908007
9950643	UDP-N-acetylmuramate--L-alanine ligase (EC 6.3.2.8) (UDP-N-acetylmuramoyl-L-alanine synthetase)	murC	PA4411					PA4411	UDP-N-acetylmuramate--alanine ligase [Pseudomonas aeruginosa PAO1]	-0.00344145	0.925048	0.961284
9946295	Cytosine deaminase	codA	PA0437					PA0437	cytosine deaminase [Pseudomonas aeruginosa PAO1]	-0.0038221	0.407577	0.656852
9949598	tRNA 5-methylaminomethyl-2-thiouridine biosynthesis bifunctional protein MnmC (tRNA mnm(5)s(2)U biosynthesis bifunctional protein) [Includes: tRNA (mnm(5)s(2)U34)-methyltransferase (EC 2.1.1.61); FAD-dependent cmnm(5)s(2)U34 oxidoreductase (EC 1.5.-.-)]	mnmC	PA3456					PA3456	hypothetical protein PA3456 [Pseudomonas aeruginosa PAO1]	-0.00386307	0.994434	0.997746
9949105	S-methyl-5'-thioinosine phosphorylase (EC 2.4.2.44) (5'-methylthioinosine phosphorylase) (MTI phosphorylase) (MTIP)	PA3004						PA3004	5-methylthioadenosine phosphorylase MtnP [Pseudomonas aeruginosa PAO1]	-0.00415753	0.685694	0.839691
9949102	Glyceraldehyde-3-phosphate dehydrogenase (EC 1.2.1.-)	PA3001						PA3001	probable glyceraldehyde-3-phosphate dehydrogenase [Pseudomonas aeruginosa PAO1]	-0.00563164	0.811017	0.912218
9949479	Probable two-component response regulator	PA3346						PA3346	probable two-component response regulator [Pseudomonas aeruginosa PAO1]	-0.00622368	0.980319	0.992085
9949986	Iron-binding protein IscA	iscA	PA3812					PA3812	probable iron-binding protein IscA [Pseudomonas aeruginosa PAO1]	-0.00623275	0.824354	0.919607
9950788	Ribosomal large subunit pseudouridine synthase D (EC 5.4.99.23) (23S rRNA pseudouridine(1911/1915/1917) synthase) (rRNA pseudouridylate synthase D) (rRNA-uridine isomerase D)	rluD	PA4544					PA4544	pseudouridine synthase [Pseudomonas aeruginosa PAO1]	-0.00844733	0.892927	0.944578
9946878	Protein TolA	tolA	PA0971					PA0971	TolA protein [Pseudomonas aeruginosa PAO1]	-0.00856574	0.607766	0.789146
9951197	Nicotinate phosphoribosyltransferase 1 (NAPRTase 1) (EC 6.3.4.21)	pncB1	PA4919					PA4919	nicotinate phosphoribosyltransferase [Pseudomonas aeruginosa PAO1]	-0.00923159	0.711567	0.854532
9951807	Probable metalloprotease	PA5474						PA5474	probable metalloprotease [Pseudomonas aeruginosa PAO1]	-0.0116668	0.401486	0.652904
9949546	Heme uptake outer membrane receptor HasR	hasR	PA3408					PA3408	heme uptake outer membrane receptor HasR precursor [Pseudomonas aeruginosa PAO1]	-0.0118759	0.855222	0.930497
9949547	Probable transmembrane sensor	PA3409						PA3409	probable transmembrane sensor [Pseudomonas aeruginosa PAO1]	-0.0125225	0.413501	0.660986
9948585	Uncharacterized protein	PA2529						PA2529	hypothetical protein PA2529 [Pseudomonas aeruginosa PAO1]	-0.0125743	0.965841	0.985458
9950527	RcpC	rcpC	PA4305					PA4305	RcpC [Pseudomonas aeruginosa PAO1]	-0.0128607	0.575814	0.768531
9946792	Arginine/ornithine transport ATP-binding protein AotP	aotP	PA0892					PA0892	arginine/ornithine transport protein AotP [Pseudomonas aeruginosa PAO1]	-0.0135449	0.977945	0.991382
9946262	Glutathione synthetase (EC 6.3.2.3) (GSH synthetase) (GSH-S) (GSHase) (Glutathione synthase)	gshB	PA0407					PA0407	glutathione synthetase [Pseudomonas aeruginosa PAO1]	-0.0137144	0.46649	0.702452
9951630	Probable pyridoxal-dependent aminotransferase	PA5313						PA5313	probable pyridoxal-dependent aminotransferase [Pseudomonas aeruginosa PAO1]	-0.0146628	0.681947	0.836839
9951580	Magnesium/cobalt transport protein	corA	PA5268					PA5268	magnesium/cobalt transport protein [Pseudomonas aeruginosa PAO1]	-0.0157172	0.565021	0.764708
9948809	Uncharacterized protein	PA2732						PA2732	hypothetical protein PA2732 [Pseudomonas aeruginosa PAO1]	-0.0164942	0.360344	0.619194
9948418	Probable aldehyde dehydrogenase	PA2378						PA2378	probable aldehyde dehydrogenase [Pseudomonas aeruginosa PAO1]	-0.016696	0.237694	0.513916
9951896	ATP synthase subunit alpha (EC 3.6.3.14) (ATP synthase F1 sector subunit alpha) (F-ATPase subunit alpha)	atpA	PA5556					PA5556	ATP synthase alpha chain [Pseudomonas aeruginosa PAO1]	-0.0175564	0.483395	0.711088
9951282	Lipid A export ATP-binding/permease protein MsbA (EC 3.6.3.-)	msbA	PA4997					PA4997	transport protein MsbA [Pseudomonas aeruginosa PAO1]	-0.0186449	0.46776	0.702533
9948557	Uncharacterized protein	PA2504						PA2504	hypothetical protein PA2504 [Pseudomonas aeruginosa PAO1]	-0.0199245	0.4706	0.704656
9949928	Probable aminotransferase	PA3759						PA3759	probable aminotransferase [Pseudomonas aeruginosa PAO1]	-0.0201379	0.845942	0.92873
9945941	SenC	senC	PA0114					PA0114	SenC [Pseudomonas aeruginosa PAO1]	-0.0204369	0.867053	0.935609
9951243	Uncharacterized protein	PA4961						PA4961	hypothetical protein PA4961 [Pseudomonas aeruginosa PAO1]	-0.0220241	0.589432	0.778196
9951009	Protein-export membrane protein SecG	secG	PA4747					PA4747	secretion protein SecG [Pseudomonas aeruginosa PAO1]	-0.0225345	0.571321	0.767722
9946473	Probable two-component sensor	PA0600						PA0600	probable two-component sensor [Pseudomonas aeruginosa PAO1]	-0.022999	0.854336	0.929962
9950003	Uncharacterized protein	PA3828						PA3828	conserved hypothetical protein [Pseudomonas aeruginosa PAO1]	-0.0233704	0.702071	0.850918
9947840	Uncharacterized protein	PA1852						PA1852	hypothetical protein PA1852 [Pseudomonas aeruginosa PAO1]	-0.0238102	0.368045	0.628753
9948319	Uncharacterized protein	PA2289						PA2289	conserved hypothetical protein [Pseudomonas aeruginosa PAO1]	-0.0241059	0.785433	0.900386
9951638	Deoxyuridine 5'-triphosphate nucleotidohydrolase (dUTPase) (EC 3.6.1.23) (dUTP pyrophosphatase)	dut	PA5321					PA5321	deoxyuridine 5'-triphosphate nucleotidohydrolase [Pseudomonas aeruginosa PAO1]	-0.0241263	0.216056	0.494769
9946870	Aspartate--tRNA(Asp/Asn) ligase (EC 6.1.1.23) (Aspartyl-tRNA synthetase) (AspRS) (Non-discriminating aspartyl-tRNA synthetase) (ND-AspRS)	aspS	PA0963					PA0963	aspartyl-tRNA synthetase [Pseudomonas aeruginosa PAO1]	-0.0244426	0.878494	0.938785
9948691	Isocitrate dehydrogenase	idh	PA2624					PA2624	isocitrate dehydrogenase [Pseudomonas aeruginosa PAO1]	-0.0246353	0.963723	0.984148
9951334	Type 4 fimbrial biogenesis protein PilM	pilM	PA5044					PA5044	type 4 fimbrial biogenesis protein PilM [Pseudomonas aeruginosa PAO1]	-0.0251831	0.506925	0.725665
9951075	L-seryl-tRNA(Sec) selenium transferase (EC 2.9.1.1) (Selenocysteine synthase) (Sec synthase) (Selenocysteinyl-tRNA(Sec) synthase)	selA	PA4808					PA4808	L-seryl-tRNA(ser) selenium transferase [Pseudomonas aeruginosa PAO1]	-0.0256214	0.794837	0.905394
9949623	Rhamnosyltransferase 1 subunit A (EC 2.4.1.-)	rhlA	PA3479					PA3479	rhamnosyltransferase chain A [Pseudomonas aeruginosa PAO1]	-0.0256487	0.814497	0.912685
9949270	UDP-2-acetamido-2-deoxy-3-oxo-D-glucuronate aminotransferase (UDP-3-oxo-D-GlcNAcA aminotransferase) (EC 2.6.1.98) (UDP-2-acetamido-2-deoxy-alpha-D-ribo-hex-3-uluronic acid transaminase) (UDP-2-acetamido-2-deoxy-ribo-hexuluronate aminotransferase)	wbpE	PA3155					PA3155	UDP-2-acetamido-2-dideoxy-d-ribo-hex-3-uluronic acid transaminase, wbpE [Pseudomonas aeruginosa PAO1]	-0.0258309	0.961609	0.98242
9951363	Sec-independent protein translocase protein TatC	tatC	PA5070					PA5070	transport protein TatC [Pseudomonas aeruginosa PAO1]	-0.0259859	0.620538	0.79885
9951479	Uncharacterized protein	PA5176						PA5176	conserved hypothetical protein [Pseudomonas aeruginosa PAO1]	-0.0267041	0.898231	0.947174
9950933	Uncharacterized protein	PA4677						PA4677	hypothetical protein PA4677 [Pseudomonas aeruginosa PAO1]	-0.0267336	0.380144	0.63654
9950727	UPF0192 protein PA4489	PA4489						PA4489	conserved hypothetical protein [Pseudomonas aeruginosa PAO1]	-0.0270275	0.960149	0.98242
9950037	Carboxylesterase	PA3859						PA3859	carboxylesterase [Pseudomonas aeruginosa PAO1]	-0.0270487	0.339923	0.603412
9950541	Uncharacterized protein	PA4317						PA4317	hypothetical protein PA4317 [Pseudomonas aeruginosa PAO1]	-0.028188	0.536173	0.747159
9950649	UDP-N-acetylmuramoyl-L-alanyl-D-glutamate--2,6-diaminopimelate ligase (EC 6.3.2.13) (Meso-A2pm-adding enzyme) (Meso-diaminopimelate-adding enzyme) (UDP-MurNAc-L-Ala-D-Glu:meso-diaminopimelate ligase) (UDP-MurNAc-tripeptide synthetase) (UDP-N-acetylmuramyl-tripeptide synthetase)	murE	PA4417					PA4417	UDP-N-acetylmuramoylalanyl-D-glutamate-2, 6-diaminopimelate ligase [Pseudomonas aeruginosa PAO1]	-0.0293056	0.765785	0.891088
9949113	DNA topoisomerase 1 (EC 5.99.1.2) (DNA topoisomerase I) (Omega-protein) (Relaxing enzyme) (Swivelase) (Untwisting enzyme)	topA	PA3011					PA3011	DNA topoisomerase I [Pseudomonas aeruginosa PAO1]	-0.0301137	0.483325	0.711088
9949370	Probable M18 family aminopeptidase 2 (EC 3.4.11.-)	apeB	PA3247					PA3247	hypothetical protein PA3247 [Pseudomonas aeruginosa PAO1]	-0.0305584	0.343721	0.605615
9949968	Probable oxidoreductase	PA3795						PA3795	probable oxidoreductase [Pseudomonas aeruginosa PAO1]	-0.0308021	0.575068	0.768531
9946465	4-hydroxythreonine-4-phosphate dehydrogenase 1 (EC 1.1.1.262) (4-(phosphohydroxy)-L-threonine dehydrogenase 1)	pdxA1	PA0593					PA0593	pyridoxal phosphate biosynthetic protein PdxA [Pseudomonas aeruginosa PAO1]	-0.0308416	0.84278	0.926783
9948881	Probable two-component response regulator	PA2798						PA2798	probable two-component response regulator [Pseudomonas aeruginosa PAO1]	-0.0308608	0.89563	0.946122
9949430	Uncharacterized protein	PA3302						PA3302	conserved hypothetical protein [Pseudomonas aeruginosa PAO1]	-0.0313766	0.649649	0.815726
9949869	Uncharacterized protein	wspD	PA3705					PA3705	hypothetical protein PA3705 [Pseudomonas aeruginosa PAO1]	-0.0313978	0.848048	0.929114
9948130	Probable transcriptional regulator	PA2115						PA2115	probable transcriptional regulator [Pseudomonas aeruginosa PAO1]	-0.033051	0.726261	0.866011
9951773	DNA helicase (EC 3.6.4.12)	uvrD	PA5443					PA5443	DNA helicase II [Pseudomonas aeruginosa PAO1]	-0.0343108	0.694207	0.845944
9951640	Phosphomannomutase/phosphoglucomutase (PMM / PGM) (EC 5.4.2.2) (EC 5.4.2.8)	algC	PA5322					PA5322	phosphomannomutase AlgC [Pseudomonas aeruginosa PAO1]	-0.034311	0.339011	0.603361
9949868	Probable chemotaxis sensor/effector fusion protein	wspE	PA3704					PA3704	probable chemotaxis sensor/effector fusion protein [Pseudomonas aeruginosa PAO1]	-0.034543	0.66112	0.825002
9948603	Exodeoxyribonuclease III	xthA	PA2545					PA2545	exodeoxyribonuclease III [Pseudomonas aeruginosa PAO1]	-0.034608	0.282078	0.553605
9948450	Uncharacterized protein	PA2406						PA2406	hypothetical protein PA2406 [Pseudomonas aeruginosa PAO1]	-0.0347963	0.923313	0.960327
9949175	NAD-specific glutamate dehydrogenase (NAD-GDH) (EC 1.4.1.2) (NAD(+)-dependent glutamate dehydrogenase)	gdhB	PA3068					PA3068	NAD-dependent glutamate dehydrogenase [Pseudomonas aeruginosa PAO1]	-0.0350068	0.460594	0.697986
9946308	Uncharacterized protein	PA0449						PA0449	hypothetical protein PA0449 [Pseudomonas aeruginosa PAO1]	-0.0359082	0.842379	0.926783
9946266	Protein PilJ	pilJ	PA0411					PA0411	twitching motility protein PilJ [Pseudomonas aeruginosa PAO1]	-0.0359812	0.9216	0.958968
9945822	DNA gyrase subunit B (EC 5.99.1.3)	gyrB	PA0004					PA0004	DNA gyrase subunit B [Pseudomonas aeruginosa PAO1]	-0.0360665	0.961044	0.98242
9949911	tRNA (guanine-N(1)-)-methyltransferase (EC 2.1.1.228) (M1G-methyltransferase) (tRNA [GM37] methyltransferase)	trmD	PA3743					PA3743	tRNA (guanine-N1)-methyltransferase [Pseudomonas aeruginosa PAO1]	-0.0361755	0.30762	0.573689
9948407	Uncharacterized protein	PA2368						PA2368	hypothetical protein PA2368 [Pseudomonas aeruginosa PAO1]	-0.0365158	0.664314	0.827703
9951804	Uncharacterized protein	PA5472						PA5472	hypothetical protein PA5472 [Pseudomonas aeruginosa PAO1]	-0.0380354	0.552333	0.759941
15597236	Probable glutamine synthetase	PA2040						PA2040	glutamine synthetase [Pseudomonas aeruginosa PAO1]	-0.0385152	0.497542	0.722002
9949891	Single-stranded-DNA-specific exonuclease RecJ	recJ	PA3725					PA3725	single-stranded-DNA-specific exonuclease RecJ [Pseudomonas aeruginosa PAO1]	-0.0386353	0.82936	0.921901
9949554	Probable pyruvate dehydrogenase E1 component, beta chain	PA3416						PA3416	probable pyruvate dehydrogenase E1 component, beta chain [Pseudomonas aeruginosa PAO1]	-0.0386565	0.666485	0.827853
9946652	Sigma factor AlgU regulatory protein MucB	mucB	algN	PA0764				PA0764	negative regulator for alginate biosynthesis MucB [Pseudomonas aeruginosa PAO1]	-0.0387684	0.773591	0.893565
9951211	50S ribosomal protein L9	rplI	PA4932					PA4932	50S ribosomal protein L9 [Pseudomonas aeruginosa PAO1]	-0.0388485	0.998173	0.998596
9950120	Uncharacterized protein	PA3934						PA3934	conserved hypothetical protein [Pseudomonas aeruginosa PAO1]	-0.0421923	0.507723	0.725665
9950605	Nicotinate phosphoribosyltransferase 2 (NAPRTase 2) (EC 6.3.4.21)	pncB2	PA4376					PA4376	nicotinate phosphoribosyltransferase [Pseudomonas aeruginosa PAO1]	-0.0426585	0.892206	0.944578
9950474	30S ribosomal protein S3	rpsC	PA4257					PA4257	30S ribosomal protein S3 [Pseudomonas aeruginosa PAO1]	-0.0427349	0.637211	0.809358
9947383	Uncharacterized protein	PA1433						PA1433	conserved hypothetical protein [Pseudomonas aeruginosa PAO1]	-0.0427986	0.708783	0.853591
9950876	Uncharacterized protein	PA4624						PA4624	hypothetical protein PA4624 [Pseudomonas aeruginosa PAO1]	-0.0435087	0.833417	0.923324
9946106	Glutarate-semialdehyde dehydrogenase DavD (EC 1.2.1.20)	davD	PA0265					PA0265	succinate-semialdehyde dehydrogenase [Pseudomonas aeruginosa PAO1]	-0.0435479	0.864375	0.934568
9951257	Probable outer membrane protein	PA4974						PA4974	probable outer membrane protein precursor [Pseudomonas aeruginosa PAO1]	-0.0438786	0.58897	0.778153
9951359	Phosphoribosyl-AMP cyclohydrolase (PRA-CH) (EC 3.5.4.19)	hisI	PA5066					PA5066	phosphoribosyl-AMP cyclohydrolase [Pseudomonas aeruginosa PAO1]	-0.0441839	0.440474	0.681493
9950983	RNA polymerase-binding transcription factor DksA	dksA	PA4723					PA4723	suppressor protein DksA [Pseudomonas aeruginosa PAO1]	-0.0447426	0.897541	0.94687
9950975	Uncharacterized protein	PA4716						PA4716	hypothetical protein PA4716 [Pseudomonas aeruginosa PAO1]	-0.0448311	0.283123	0.554108
9946647	tRNA-modifying protein YgfZ	PA0759						PA0759	conserved hypothetical protein [Pseudomonas aeruginosa PAO1]	-0.0449657	0.536398	0.747159
9946183	Uncharacterized protein	PA0335						PA0335	hypothetical protein PA0335 [Pseudomonas aeruginosa PAO1]	-0.045324	0.723631	0.864073
9946862	Proline--tRNA ligase (EC 6.1.1.15) (Prolyl-tRNA synthetase) (ProRS)	proS	PA0956					PA0956	prolyl-tRNA synthetase [Pseudomonas aeruginosa PAO1]	-0.0455852	0.577314	0.770078
9949626	Iron-sulfur cluster carrier protein	PA3481						PA3481	conserved hypothetical protein [Pseudomonas aeruginosa PAO1]	-0.0464845	0.532448	0.744293
9947082	Probable cold-shock protein	PA1159						PA1159	probable cold-shock protein [Pseudomonas aeruginosa PAO1]	-0.0467204	0.766917	0.891966
9949849	Uncharacterized protein	PA3685						PA3685	conserved hypothetical protein [Pseudomonas aeruginosa PAO1]	-0.0478576	0.375984	0.633618
9949191	Aminopeptidase N	pepN	PA3083					PA3083	aminopeptidase N [Pseudomonas aeruginosa PAO1]	-0.0480137	0.900442	0.94739
9951480	Probable hydrolase	PA5177						PA5177	probable hydrolase [Pseudomonas aeruginosa PAO1]	-0.0481945	0.858586	0.931581
9949995	Protein translocase subunit SecD	secD	PA3821					PA3821	secretion protein SecD [Pseudomonas aeruginosa PAO1]	-0.0486428	0.781895	0.898507
9946651	Sigma factor AlgU negative regulatory protein	mucA	PA0763					PA0763	anti-sigma factor MucA [Pseudomonas aeruginosa PAO1]	-0.0487788	0.569752	0.767363
9946856	Arsenate reductase (EC 1.20.4.1)	PA0950						PA0950	probable arsenate reductase [Pseudomonas aeruginosa PAO1]	-0.0495144	0.659228	0.82318
9950952	Acetolactate synthase isozyme III small subunit	ilvH	PA4695					PA4695	acetolactate synthase isozyme III small subunit [Pseudomonas aeruginosa PAO1]	-0.0495317	0.317162	0.584102
9951590	Diaminopimelate decarboxylase (DAP decarboxylase) (DAPDC) (EC 4.1.1.20)	lysA	PA5277					PA5277	diaminopimelate decarboxylase [Pseudomonas aeruginosa PAO1]	-0.0503263	0.383428	0.638416
9948727	Probable two-component response regulator	PA2657						PA2657	probable two-component response regulator [Pseudomonas aeruginosa PAO1]	-0.0516411	0.900395	0.94739
9950488	DNA-directed RNA polymerase subunit beta (RNAP subunit beta) (EC 2.7.7.6) (RNA polymerase subunit beta) (Transcriptase subunit beta)	rpoB	PA4270					PA4270	DNA-directed RNA polymerase beta chain [Pseudomonas aeruginosa PAO1]	-0.0520384	0.569781	0.767363
9950989	3-methyl-2-oxobutanoate hydroxymethyltransferase 2 (EC 2.1.2.11) (Ketopantoate hydroxymethyltransferase 2) (KPHMT 2)	panB2	PA4729					PA4729	3-methyl-2-oxobutanoate hydroxymethyltransferase [Pseudomonas aeruginosa PAO1]	-0.0529706	0.890322	0.944578
9947773	Uncharacterized protein	PA1791						PA1791	hypothetical protein PA1791 [Pseudomonas aeruginosa PAO1]	-0.0530004	0.578089	0.770477
9950951	Ketol-acid reductoisomerase (NADP(+)) (KARI) (EC 1.1.1.86) (Acetohydroxy-acid isomeroreductase) (AHIR) (Alpha-keto-beta-hydroxylacyl reductoisomerase) (Ketol-acid reductoisomerase type 1) (Ketol-acid reductoisomerase type I)	ilvC	PA4694					PA4694	ketol-acid reductoisomerase [Pseudomonas aeruginosa PAO1]	-0.0533158	0.392644	0.645117
9950226	Inorganic pyrophosphatase (EC 3.6.1.1) (Pyrophosphate phospho-hydrolase) (PPase)	ppa	PA4031					PA4031	inorganic pyrophosphatase [Pseudomonas aeruginosa PAO1]	-0.0534707	0.70179	0.850918
9951325	Glutamate synthase large chain	gltB	PA5036					PA5036	glutamate synthase large chain precursor [Pseudomonas aeruginosa PAO1]	-0.0534775	0.994856	0.997746
9949872	Probable chemotaxis transducer	wspA	PA3708					PA3708	probable chemotaxis transducer [Pseudomonas aeruginosa PAO1]	-0.0548438	0.847716	0.929114
9949796	CTP synthase (EC 6.3.4.2) (Cytidine 5'-triphosphate synthase) (Cytidine triphosphate synthetase) (CTP synthetase) (CTPS) (UTP--ammonia ligase)	pyrG	PA3637					PA3637	CTP synthase [Pseudomonas aeruginosa PAO1]	-0.0551062	0.616754	0.795752
9950925	Ribose-phosphate pyrophosphokinase (RPPK) (EC 2.7.6.1) (5-phospho-D-ribosyl alpha-1-diphosphate) (Phosphoribosyl diphosphate synthase) (Phosphoribosyl pyrophosphate synthase) (P-Rib-PP synthase) (PRPP synthase) (PRPPase)	prs	PA4670					PA4670	ribose-phosphate pyrophosphokinase [Pseudomonas aeruginosa PAO1]	-0.0557306	0.607639	0.789146
9947682	Translocator protein PopB	popB	PA1708					PA1708	translocator protein PopB [Pseudomonas aeruginosa PAO1]	-0.0561211	0.640471	0.810842
9947925	Probable chemotaxis transducer	PA1930						PA1930	probable chemotaxis transducer [Pseudomonas aeruginosa PAO1]	-0.0566333	0.43299	0.676566
9946953	Uncharacterized protein	PA1040						PA1040	hypothetical protein PA1040 [Pseudomonas aeruginosa PAO1]	-0.0572927	0.598895	0.785139
9950766	Nicotinate-nucleotide pyrophosphorylase [carboxylating] (EC 2.4.2.19) (Quinolinate phosphoribosyltransferase [decarboxylating]) (QAPRTase)	nadC	PA4524					PA4524	nicotinate-nucleotide pyrophosphorylase [Pseudomonas aeruginosa PAO1]	-0.0580846	0.671979	0.830651
9951571	Porphobilinogen deaminase (PBG) (EC 2.5.1.61) (Hydroxymethylbilane synthase) (HMBS) (Pre-uroporphyrinogen synthase)	hemC	PA5260					PA5260	porphobilinogen deaminase [Pseudomonas aeruginosa PAO1]	-0.0583093	0.491861	0.717728
9946253	Cystathionine beta-synthase	PA0399						PA0399	cystathionine beta-synthase [Pseudomonas aeruginosa PAO1]	-0.0584359	0.470535	0.704656
9950619	Probable short-chain dehydrogenase	speA	PA4389					PA4389	probable short-chain dehydrogenase [Pseudomonas aeruginosa PAO1]	-0.0595066	0.611624	0.791257
9946835	Ferric enterobactin receptor PirA	pirA	PA0931					PA0931	ferric enterobactin receptor PirA [Pseudomonas aeruginosa PAO1]	-0.0600106	0.575124	0.768531
9949615	NAD-dependent malic enzyme (NAD-ME) (EC 1.1.1.38)	maeA	PA3471					PA3471	probable malic enzyme [Pseudomonas aeruginosa PAO1]	-0.0603874	0.909927	0.952197
9949865	Lysine--tRNA ligase (EC 6.1.1.6) (Lysyl-tRNA synthetase) (LysRS)	lysS	PA3700					PA3700	lysyl-tRNA synthetase [Pseudomonas aeruginosa PAO1]	-0.060849	0.52905	0.741361
9946846	Uncharacterized protein	PA0941						PA0941	hypothetical protein PA0941 [Pseudomonas aeruginosa PAO1]	-0.0610591	0.888723	0.944578
9950711	Uncharacterized protein	PA4474						PA4474	conserved hypothetical protein [Pseudomonas aeruginosa PAO1]	-0.0618827	0.525085	0.738811
9949883	Peptidyl-prolyl cis-trans isomerase (EC 5.2.1.8)	PA3717						PA3717	probable peptidyl-prolyl cis-trans isomerase, FkbP-type [Pseudomonas aeruginosa PAO1]	-0.062623	0.482603	0.711088
9949845	Uncharacterized protein	PA3682						PA3682	hypothetical protein PA3682 [Pseudomonas aeruginosa PAO1]	-0.062909	0.997904	0.998596
9951200	Azurin	azu	PA4922					PA4922	azurin precursor [Pseudomonas aeruginosa PAO1]	-0.0634567	0.821674	0.918434
9950964	Hemin import ATP-binding protein HmuV (EC 3.6.3.-)	hmuV	phuV	PA4706				PA4706	probable ATP-binding component of ABC transporter [Pseudomonas aeruginosa PAO1]	-0.0636123	0.760955	0.887655
9949829	Probable cysteine desulfurase (EC 2.8.1.7)	csd	PA3667					PA3667	probable pyridoxal-phosphate dependent enzyme [Pseudomonas aeruginosa PAO1]	-0.0638683	0.9495	0.97638
9950558	Probable fumarase	PA4333						PA4333	probable fumarase [Pseudomonas aeruginosa PAO1]	-0.0639622	0.292313	0.559479
9946463	Protein ApaG	apaG	PA0591					PA0591	conserved hypothetical protein [Pseudomonas aeruginosa PAO1]	-0.0640471	0.329428	0.593543
9951464	dTDP-4-dehydrorhamnose reductase	rmlD	PA5162					PA5162	dTDP-4-dehydrorhamnose reductase [Pseudomonas aeruginosa PAO1]	-0.0653523	0.342231	0.603892
9950734	Uncharacterized protein	PA4495						PA4495	hypothetical protein PA4495 [Pseudomonas aeruginosa PAO1]	-0.0662446	0.432768	0.676566
9951903	Chromosome partitioning protein Spo0J	spoOJ	PA5562					PA5562	chromosome partitioning protein Spo0J [Pseudomonas aeruginosa PAO1]	-0.0664445	0.656295	0.820702
9950180	DNA polymerase III, delta subunit	holA	PA3989					PA3989	DNA polymerase III, delta subunit [Pseudomonas aeruginosa PAO1]	-0.0668679	0.750288	0.879558
9951841	Probable TonB-dependent receptor	PA5505						PA5505	probable TonB-dependent receptor [Pseudomonas aeruginosa PAO1]	-0.0673419	0.342156	0.603892
9950792	Probable D-amino acid oxidase PA4548	PA4548						PA4548	probable D-amino acid oxidase [Pseudomonas aeruginosa PAO1]	-0.0673911	0.495594	0.720947
9951299	Branched-chain-amino-acid aminotransferase (BCAT) (EC 2.6.1.42)	ilvE	PA5013					PA5013	branched-chain amino acid transferase [Pseudomonas aeruginosa PAO1]	-0.0678214	0.481529	0.711088
9946850	Phosphoribosylformylglycinamidine cyclo-ligase (EC 6.3.3.1) (AIR synthase) (AIRS) (Phosphoribosyl-aminoimidazole synthetase)	purM	PA0945					PA0945	phosphoribosylaminoimidazole synthetase [Pseudomonas aeruginosa PAO1]	-0.0687574	0.821834	0.918434
9950701	Nucleotide-binding protein PA4465	PA4465						PA4465	conserved hypothetical protein [Pseudomonas aeruginosa PAO1]	-0.0690454	0.41691	0.663739
9948899	Probable acyl-CoA dehydrogenase	PA2815						PA2815	probable acyl-CoA dehydrogenase [Pseudomonas aeruginosa PAO1]	-0.0690572	0.557767	0.761181
9949075	Ribonuclease E (RNase E) (EC 3.1.26.12)	rne	PA2976					PA2976	ribonuclease E [Pseudomonas aeruginosa PAO1]	-0.0695276	0.511897	0.728943
9950540	Exodeoxyribonuclease I (EC 3.1.11.1)	sbcB	PA4316					PA4316	exodeoxyribonuclease I [Pseudomonas aeruginosa PAO1]	-0.0706087	0.29959	0.565598
9951330	Fimbrial assembly protein PilQ	pilQ	PA5040					PA5040	Type 4 fimbrial biogenesis outer membrane protein PilQ precursor [Pseudomonas aeruginosa PAO1]	-0.0710591	0.836428	0.924284
9950856	Uncharacterized protein	PA4606						PA4606	conserved hypothetical protein [Pseudomonas aeruginosa PAO1]	-0.0713419	0.935509	0.96666
9947306	Probable transmembrane sensor	PA1364						PA1364	probable transmembrane sensor [Pseudomonas aeruginosa PAO1]	-0.0715438	0.989184	0.99692
9951771	Uncharacterized protein	PA5441						PA5441	hypothetical protein PA5441 [Pseudomonas aeruginosa PAO1]	-0.0728518	0.518842	0.733965
9949902	Threonine synthase (TS) (EC 4.2.3.1)	thrC	PA3735					PA3735	threonine synthase [Pseudomonas aeruginosa PAO1]	-0.0733765	0.52424	0.738503
9947012	B-type flagellar protein FliS	fliS	PA1095					PA1095	hypothetical protein PA1095 [Pseudomonas aeruginosa PAO1]	-0.0739389	0.561473	0.761765
9950812	GTPase Obg (EC 3.6.5.-) (GTP-binding protein Obg)	obg	PA4566					PA4566	GTP-binding protein Obg [Pseudomonas aeruginosa PAO1]	-0.0740853	0.550098	0.758827
9946225	Signal recognition particle receptor FtsY (SRP receptor)	ftsY	PA0373					PA0373	signal recognition particle receptor FtsY [Pseudomonas aeruginosa PAO1]	-0.0741734	0.516831	0.732876
9949038	Probable magnesium chelatase	PA2942						PA2942	probable magnesium chelatase [Pseudomonas aeruginosa PAO1]	-0.0744108	0.351492	0.611731
9950026	Nucleoid-associated protein PA3849	PA3849						PA3849	conserved hypothetical protein [Pseudomonas aeruginosa PAO1]	-0.074532	0.290395	0.558576
9949807	Skp-like protein	PA3647						PA3647	probable outer membrane protein precursor [Pseudomonas aeruginosa PAO1]	-0.0754169	0.994507	0.997746
15596238	Probable outer membrane protein	PA1041						PA1041	outer membrane protein precursor [Pseudomonas aeruginosa PAO1]	-0.076227	0.406801	0.65605
9948448	Uncharacterized protein	PA2404						PA2404	hypothetical protein PA2404 [Pseudomonas aeruginosa PAO1]	-0.0768636	0.429184	0.673292
9949432	Uncharacterized protein	PA3304						PA3304	conserved hypothetical protein [Pseudomonas aeruginosa PAO1]	-0.0769499	0.849854	0.929782
9949070	Uncharacterized protein	PA2971						PA2971	conserved hypothetical protein [Pseudomonas aeruginosa PAO1]	-0.0776303	0.799505	0.906301
9949482	Probable chemotaxis protein	PA3349						PA3349	probable chemotaxis protein [Pseudomonas aeruginosa PAO1]	-0.0801271	0.30585	0.571906
9951631	Uncharacterized protein	PA5314						PA5314	hypothetical protein PA5314 [Pseudomonas aeruginosa PAO1]	-0.0801714	0.707742	0.853591
9950465	50S ribosomal protein L6	rplF	PA4248					PA4248	50S ribosomal protein L6 [Pseudomonas aeruginosa PAO1]	-0.0801741	0.788246	0.901694
9947395	Flagellar motor switch protein FliN	fliN	PA1444					PA1444	flagellar motor switch protein FliN [Pseudomonas aeruginosa PAO1]	-0.0802586	0.492965	0.718895
9946752	Uncharacterized protein	PA0855						PA0855	hypothetical protein PA0855 [Pseudomonas aeruginosa PAO1]	-0.0802931	0.566452	0.765099
9950754	Probable oxidoreductase	PA4513						PA4513	probable oxidoreductase [Pseudomonas aeruginosa PAO1]	-0.0805128	0.333282	0.597368
9945959	Putative 3-oxopropanoate dehydrogenase (EC 1.2.1.-)	bauC	PA0130					PA0130	probable aldehyde dehydrogenase [Pseudomonas aeruginosa PAO1]	-0.080629	0.277432	0.55147
9951276	Uncharacterized protein	PA4991						PA4991	hypothetical protein PA4991 [Pseudomonas aeruginosa PAO1]	-0.081264	0.606097	0.788762
9949437	RNA polymerase-associated protein RapA (EC 3.6.4.-) (ATP-dependent helicase HepA)	rapA	hepA	PA3308				PA3308	RNA helicase HepA [Pseudomonas aeruginosa PAO1]	-0.0813476	0.432418	0.676566
15595288	Protein ClpV1	clpV1	PA0090					PA0090	ClpV1 [Pseudomonas aeruginosa PAO1]	-0.082271	0.557972	0.761181
9946316	Probable cold-shock protein	PA0456						PA0456	probable cold-shock protein [Pseudomonas aeruginosa PAO1]	-0.0822783	0.877808	0.938634
9950072	Probable ATP-binding component of ABC transporter	PA3891						PA3891	probable ATP-binding component of ABC transporter [Pseudomonas aeruginosa PAO1]	-0.0837136	0.294722	0.562066
9945823	Lysophosphatidic acid acyltransferase, LptA	lptA	PA0005					PA0005	lysophosphatidic acid acyltransferase, LptA [Pseudomonas aeruginosa PAO1]	-0.0843273	0.571258	0.767722
9951663	OxyR	oxyR	PA5344					PA5344	OxyR [Pseudomonas aeruginosa PAO1]	-0.0844126	0.628528	0.803876
9951895	ATP synthase gamma chain (ATP synthase F1 sector gamma subunit) (F-ATPase gamma subunit)	atpG	PA5555					PA5555	ATP synthase gamma chain [Pseudomonas aeruginosa PAO1]	-0.0844167	0.655296	0.820336
9948918	Thiopurine S-methyltransferase (EC 2.1.1.67) (Thiopurine methyltransferase)	tpm	PA2832					PA2832	thiopurine methyltransferase [Pseudomonas aeruginosa PAO1]	-0.0850007	0.869594	0.935765
9949780	RNA polymerase sigma factor RpoS (Sigma S) (Sigma-38)	rpoS	PA3622					PA3622	sigma factor RpoS [Pseudomonas aeruginosa PAO1]	-0.0850875	0.853332	0.929782
9951514	Uncharacterized protein	PA5208						PA5208	conserved hypothetical protein [Pseudomonas aeruginosa PAO1]	-0.0851772	0.848562	0.929247
15597962	Probable transcriptional regulator	PA2766						PA2766	transcriptional regulator [Pseudomonas aeruginosa PAO1]	-0.0852583	0.916053	0.956145
9950025	Uncharacterized protein	PA3848						PA3848	hypothetical protein PA3848 [Pseudomonas aeruginosa PAO1]	-0.0859835	0.435226	0.677368
9951765	Probable biotin carboxylase subunit of a transcarboxylase	PA5436						PA5436	probable biotin carboxylase subunit of a transcarboxylase [Pseudomonas aeruginosa PAO1]	-0.0863012	0.64904	0.815726
9951141	Urease subunit alpha (EC 3.5.1.5) (Urea amidohydrolase subunit alpha)	ureC	PA4868					PA4868	urease alpha subunit [Pseudomonas aeruginosa PAO1]	-0.0864598	0.906275	0.949719
9947321	Uncharacterized protein	PA1377						PA1377	conserved hypothetical protein [Pseudomonas aeruginosa PAO1]	-0.086715	0.294992	0.562127
9949429	Uncharacterized protein	PA3301						PA3301	hypothetical protein PA3301 [Pseudomonas aeruginosa PAO1]	-0.0868503	0.590623	0.778248
9948593	Probable phosphatidate cytidylyltransferase	PA2536						PA2536	probable phosphatidate cytidylyltransferase [Pseudomonas aeruginosa PAO1]	-0.0872627	0.74394	0.877702
9951328	3-dehydroquinate synthase (EC 4.2.3.4)	aroB	PA5038					PA5038	3-dehydroquinate synthase [Pseudomonas aeruginosa PAO1]	-0.0882636	0.842536	0.926783
9951345	ATP-dependent protease ATPase subunit HslU (Unfoldase HslU)	hslU	PA5054					PA5054	heat shock protein HslU [Pseudomonas aeruginosa PAO1]	-0.0886655	0.55817	0.761181
9951897	ATP synthase subunit delta (ATP synthase F(1) sector subunit delta) (F-type ATPase subunit delta) (F-ATPase subunit delta)	atpH	PA5557					PA5557	ATP synthase delta chain [Pseudomonas aeruginosa PAO1]	-0.0902838	0.507042	0.725665
9951546	3-octaprenyl-4-hydroxybenzoate carboxy-lyase (EC 4.1.1.98) (Polyprenyl p-hydroxybenzoate decarboxylase)	ubiD	PA5237					PA5237	conserved hypothetical protein [Pseudomonas aeruginosa PAO1]	-0.090852	0.433741	0.676749
9950385	Peptidylprolyl isomerase (EC 5.2.1.8)	ppiC2	PA4176					PA4176	peptidyl-prolyl cis-trans isomerase C2 [Pseudomonas aeruginosa PAO1]	-0.0910053	0.357764	0.615429
9950818	Peptidyl-prolyl cis-trans isomerase (EC 5.2.1.8)	fklB	PA4572					PA4572	peptidyl-prolyl cis-trans isomerase FklB [Pseudomonas aeruginosa PAO1]	-0.0913993	0.517341	0.733038
9947768	Aconitate hydratase B (ACN) (Aconitase) (EC 4.2.1.3) ((2R,3S)-2-methylisocitrate dehydratase) ((2S,3R)-3-hydroxybutane-1,2,3-tricarboxylate dehydratase) (2-methyl-cis-aconitate hydratase) (EC 4.2.1.99) (Iron-responsive protein-like) (IRP-like) (RNA-binding protein)	acnB	PA1787					PA1787	aconitate hydratase 2 [Pseudomonas aeruginosa PAO1]	-0.0920828	0.259179	0.532893
9949262	UDP-2,3-diacetamido-2,3-dideoxy-D-glucuronate 2-epimerase (UDP-alpha-D-GlcNAc3NAcA 2-epimerase) (EC 5.1.3.23) (UDP-2,3-diacetamido-2,3-dideoxy-alpha-D-glucuronic acid 2-epimerase)	wbpI	PA3148					PA3148	UDP-N-acetylglucosamine 2-epimerase WbpI [Pseudomonas aeruginosa PAO1]	-0.0923478	0.375291	0.633208
9949282	P-protein [Includes: Chorismate mutase (CM) (EC 5.4.99.5); Prephenate dehydratase (PDT) (EC 4.2.1.51)]	pheA	PA3166					PA3166	chorismate mutase [Pseudomonas aeruginosa PAO1]	-0.0925831	0.161986	0.438487
9949820	Probable aminotransferase	PA3659						PA3659	probable aminotransferase [Pseudomonas aeruginosa PAO1]	-0.0931856	0.572234	0.768075
9951894	ATP synthase subunit beta (EC 3.6.3.14) (ATP synthase F1 sector subunit beta) (F-ATPase subunit beta)	atpD	PA5554					PA5554	ATP synthase beta chain [Pseudomonas aeruginosa PAO1]	-0.0941858	0.42389	0.67123
9951532	Aminopeptidase P	pepP	PA5224					PA5224	aminopeptidase P [Pseudomonas aeruginosa PAO1]	-0.0943758	0.945927	0.97313
9950251	3,4-dihydroxy-2-butanone 4-phosphate synthase (DHBP synthase) (EC 4.1.99.12)	ribB	PA4054					PA4054	GTP cyclohydrolase II / 3,4-dihydroxy-2-butanone 4-phosphate synthase [Pseudomonas aeruginosa PAO1]	-0.0943806	0.707561	0.853591
9951669	Rubredoxin-NAD(+) reductase (RdxR) (EC 1.18.1.1)	alkT	PA5349					PA5349	probable rubredoxin reductase [Pseudomonas aeruginosa PAO1]	-0.0948318	0.856247	0.930754
9951869	Protein TonB	tonB	PA5531					PA5531	TonB1 [Pseudomonas aeruginosa PAO1]	-0.0950752	0.680042	0.835804
9948427	L-ornithine N(5)-monooxygenase (EC 1.14.13.195) (L-ornithine N(5)-hydroxylase) (Ornithine hydroxylase) (L-ornithine N(5)-oxygenase) (Pyoverdin biosynthesis protein A)	pvdA	pvd-1	PA2386				PA2386	L-ornithine N5-oxygenase [Pseudomonas aeruginosa PAO1]	-0.0959928	0.87145	0.935765
9951686	Phosphate-specific transport system accessory protein PhoU homolog (Pst system accessory protein PhoU homolog)	phoU	PA5365					PA5365	phosphate uptake regulatory protein PhoU [Pseudomonas aeruginosa PAO1]	-0.0960855	0.466814	0.702452
9951227	N-acetylmuramoyl-L-alanine amidase	amiB	PA4947					PA4947	N-acetylmuramoyl-L-alanine amidase [Pseudomonas aeruginosa PAO1]	-0.0964898	0.466523	0.702452
9948039	Uncharacterized protein	PA2034						PA2034	hypothetical protein PA2034 [Pseudomonas aeruginosa PAO1]	-0.0965066	0.550238	0.758827
9945908	Uncharacterized protein	PA0083						PA0083	conserved hypothetical protein [Pseudomonas aeruginosa PAO1]	-0.0967828	0.28704	0.556436
9949775	Protein RecA (Recombinase A)	recA	PA3617					PA3617	RecA protein [Pseudomonas aeruginosa PAO1]	-0.0969575	0.583631	0.773929
9949381	Periplasmic tail-specific protease	prc	PA3257					PA3257	periplasmic tail-specific protease [Pseudomonas aeruginosa PAO1]	-0.097969	0.390897	0.642693
9950588	Uncharacterized protein	PA4360						PA4360	hypothetical protein PA4360 [Pseudomonas aeruginosa PAO1]	-0.0985194	0.966706	0.985915
9948684	Putative arginyl-tRNA--protein transferase (Arginyltransferase) (R-transferase) (EC 2.3.2.8)	ate	PA2618					PA2618	hypothetical protein PA2618 [Pseudomonas aeruginosa PAO1]	-0.0993581	0.785979	0.900386
9947783	Trigger factor (TF) (EC 5.2.1.8) (PPIase)	tig	PA1800					PA1800	trigger factor [Pseudomonas aeruginosa PAO1]	-0.0998516	0.501572	0.724331
9949132	Molybdenum cofactor biosynthesis protein A2	moeA2	PA3028					PA3028	molybdenum cofactor biosynthesis protein A2 [Pseudomonas aeruginosa PAO1]	-0.0999726	0.643814	0.811514
9947059	Uncharacterized protein	PA1139						PA1139	hypothetical protein PA1139 [Pseudomonas aeruginosa PAO1]	-0.100448	0.374398	0.632751
9951046	Cyclic di-GMP phosphodiesterase	PA4781						PA4781	cyclic di-GMP phosphodiesterase [Pseudomonas aeruginosa PAO1]	-0.101136	0.712174	0.854826
9950260	Uncharacterized protein	PA4063						PA4063	hypothetical protein PA4063 [Pseudomonas aeruginosa PAO1]	-0.101368	0.242789	0.516123
9948334	AmbE	ambE	PA2302					PA2302	AmbE [Pseudomonas aeruginosa PAO1]	-0.102022	0.243762	0.51709
9951507	Uncharacterized protein	PA5201						PA5201	conserved hypothetical protein [Pseudomonas aeruginosa PAO1]	-0.102187	0.931208	0.965561
9948029	Uncharacterized protein PA2024	PA2024						PA2024	probable ring-cleaving dioxygenase [Pseudomonas aeruginosa PAO1]	-0.102624	0.49955	0.723436
9950599	Insulin-cleaving metalloproteinase outer membrane protein	icmP	PA4370					PA4370	Insulin-cleaving metalloproteinase outer membrane protein precursor [Pseudomonas aeruginosa PAO1]	-0.102665	0.42876	0.673292
9951478	3,5-bisphosphate nucleotidase CysQ	cysQ	PA5175					PA5175	3,5-bisphosphate nucleotidase CysQ [Pseudomonas aeruginosa PAO1]	-0.102982	0.340395	0.603412
9949996	Uncharacterized protein	PA3822						PA3822	conserved hypothetical protein [Pseudomonas aeruginosa PAO1]	-0.103118	0.397081	0.650368
9950941	Uncharacterized protein	PA4684						PA4684	hypothetical protein PA4684 [Pseudomonas aeruginosa PAO1]	-0.103204	0.274776	0.550718
9947007	Flagellar glycosyl transferase, FgtA	fgtA	PA1091					PA1091	flagellar glycosyl transferase, FgtA [Pseudomonas aeruginosa PAO1]	-0.103797	0.512958	0.729863
9947234	Uncharacterized protein	PA1298						PA1298	conserved hypothetical protein [Pseudomonas aeruginosa PAO1]	-0.105118	0.333151	0.597368
9945836	Ribosomal RNA small subunit methyltransferase B (EC 2.1.1.176) (16S rRNA m5C967 methyltransferase) (rRNA (cytosine-C(5)-)-methyltransferase RsmB)	rsmB	rrmB	PA0017				PA0017	conserved hypothetical protein [Pseudomonas aeruginosa PAO1]	-0.105891	0.529216	0.741361
15597567	Probable ClpA/B-type protease	PA2371						PA2371	ClpA/B-type protease [Pseudomonas aeruginosa PAO1]	-0.106498	0.662241	0.825965
9951504	AmgS	amgS	PA5199					PA5199	AmgS [Pseudomonas aeruginosa PAO1]	-0.106917	0.267625	0.543826
9948401	Uncharacterized protein	PA2363						PA2363	hypothetical protein PA2363 [Pseudomonas aeruginosa PAO1]	-0.107171	0.242869	0.516123
9949674	Argininosuccinate synthase (EC 6.3.4.5) (Citrulline--aspartate ligase)	argG	PA3525					PA3525	argininosuccinate synthase [Pseudomonas aeruginosa PAO1]	-0.107455	0.502841	0.724331
9947561	Uncharacterized protein	PA1597						PA1597	hypothetical protein PA1597 [Pseudomonas aeruginosa PAO1]	-0.107491	0.752358	0.881548
9950946	Uncharacterized protein	PA4689						PA4689	hypothetical protein PA4689 [Pseudomonas aeruginosa PAO1]	-0.108131	0.730742	0.868722
9946650	RNA polymerase sigma-H factor (Sigma-30)	algU	algT	PA0762				PA0762	sigma factor AlgU [Pseudomonas aeruginosa PAO1]	-0.10819	0.283379	0.554108
9950681	AlgW protein	algW	PA4446					PA4446	AlgW protein [Pseudomonas aeruginosa PAO1]	-0.108808	0.458196	0.69614
9949395	Uncharacterized protein	PA3270						PA3270	hypothetical protein PA3270 [Pseudomonas aeruginosa PAO1]	-0.108857	0.507408	0.725665
9951006	Translation initiation factor IF-2	infB	PA4744					PA4744	translation initiation factor IF-2 [Pseudomonas aeruginosa PAO1]	-0.109065	0.844694	0.928456
9949881	Uncharacterized protein	PA3716						PA3716	hypothetical protein PA3716 [Pseudomonas aeruginosa PAO1]	-0.109506	0.438026	0.679887
9946925	Probable glycosyl transferase	PA1014						PA1014	probable glycosyl transferase [Pseudomonas aeruginosa PAO1]	-0.109665	0.133871	0.409416
9948586	Uncharacterized protein	PA2530						PA2530	hypothetical protein PA2530 [Pseudomonas aeruginosa PAO1]	-0.109832	0.473935	0.707307
9950682	Histidinol-phosphate aminotransferase 1 (EC 2.6.1.9) (Imidazole acetol-phosphate transaminase 1)	hisC1	PA4447					PA4447	histidinol-phosphate aminotransferase [Pseudomonas aeruginosa PAO1]	-0.110295	0.595239	0.782059
9951041	PmrA: two-component regulator system response regulator PmrA	pmrA	PA4776					PA4776	PmrA: two-component regulator system response regulator PmrA [Pseudomonas aeruginosa PAO1]	-0.110413	0.227127	0.504532
9949771	Uncharacterized protein	PA3614						PA3614	hypothetical protein PA3614 [Pseudomonas aeruginosa PAO1]	-0.110433	0.32712	0.59137
15595656	Probable ClpA/B protease ATP binding subunit	PA0459						PA0459	ClpA/B protease ATP binding subunit [Pseudomonas aeruginosa PAO1]	-0.110754	0.590689	0.778248
9950870	Uncharacterized protein	PA4618						PA4618	hypothetical protein PA4618 [Pseudomonas aeruginosa PAO1]	-0.111518	0.877352	0.938634
9949213	Type II secretion system protein E (T2SS protein E) (General secretion pathway protein E) (Type II traffic warden ATPase)	xcpR	PA3103					PA3103	general secretion pathway protein E [Pseudomonas aeruginosa PAO1]	-0.111565	0.482601	0.711088
9950136	Two-component response regulator RocA1	rocA1	PA3948					PA3948	two-component response regulator RocA1 [Pseudomonas aeruginosa PAO1]	-0.111861	0.222236	0.500667
9950484	Elongation factor G 1 (EF-G 1)	fusA	fusA1	PA4266				PA4266	elongation factor G [Pseudomonas aeruginosa PAO1]	-0.112686	0.246865	0.518626
9950518	Two-component response regulator, PprB	pprB	PA4296					PA4296	two-component response regulator, PprB [Pseudomonas aeruginosa PAO1]	-0.112913	0.706744	0.85359
9950687	Uncharacterized protein	PA4452						PA4452	conserved hypothetical protein [Pseudomonas aeruginosa PAO1]	-0.113006	0.317119	0.584102
9951633	50S ribosomal protein L28	rpmB	PA5316					PA5316	50S ribosomal protein L28 [Pseudomonas aeruginosa PAO1]	-0.11355	0.416134	0.66295
9951613	Xanthine phosphoribosyltransferase (XPRTase) (EC 2.4.2.22)	xpt	PA5298					PA5298	xanthine phosphoribosyltransferase [Pseudomonas aeruginosa PAO1]	-0.113811	0.15536	0.433414
9949071	Maf-like protein PA2972	PA2972						PA2972	conserved hypothetical protein [Pseudomonas aeruginosa PAO1]	-0.114103	0.326754	0.59137
9950531	Uncharacterized protein	PA4308						PA4308	conserved hypothetical protein [Pseudomonas aeruginosa PAO1]	-0.114197	0.335753	0.600386
9951281	Bifunctional protein HldE [Includes: D-beta-D-heptose 7-phosphate kinase (EC 2.7.1.167) (D-beta-D-heptose 7-phosphotransferase) (D-glycero-beta-D-manno-heptose-7-phosphate kinase); D-beta-D-heptose 1-phosphate adenylyltransferase (EC 2.7.7.70) (D-glycero-beta-D-manno-heptose 1-phosphate adenylyltransferase)]	hldE	rfaE	PA4996				PA4996	LPS biosynthesis protein RfaE [Pseudomonas aeruginosa PAO1]	-0.114222	0.66684	0.827853
9949907	Probable sodium/hydrogen antiporter	PA3739						PA3739	probable sodium/hydrogen antiporter [Pseudomonas aeruginosa PAO1]	-0.114828	0.604999	0.788736
9947807	Uncharacterized protein	fimL	PA1822					PA1822	hypothetical protein PA1822 [Pseudomonas aeruginosa PAO1]	-0.115793	0.234591	0.511419
9948679	Uncharacterized protein	PA2613						PA2613	conserved hypothetical protein [Pseudomonas aeruginosa PAO1]	-0.115901	0.21875	0.496437
9948357	Probable glyceraldehyde-3-phosphate dehydrogenase	PA2323						PA2323	probable glyceraldehyde-3-phosphate dehydrogenase [Pseudomonas aeruginosa PAO1]	-0.116836	0.910182	0.952197
9948644	Uncharacterized protein	PA2582						PA2582	hypothetical protein PA2582 [Pseudomonas aeruginosa PAO1]	-0.117064	0.405703	0.655622
9947083	Uncharacterized protein	PA1160						PA1160	hypothetical protein PA1160 [Pseudomonas aeruginosa PAO1]	-0.117094	0.558797	0.761181
9950494	Transcription termination/antitermination protein NusG	nusG	PA4275					PA4275	transcription antitermination protein NusG [Pseudomonas aeruginosa PAO1]	-0.117293	0.166385	0.44292
9948543	Probable oxidoreductase	PA2491						PA2491	probable oxidoreductase [Pseudomonas aeruginosa PAO1]	-0.118759	0.463243	0.700651
9948870	Probable chemotaxis transducer	PA2788						PA2788	probable chemotaxis transducer [Pseudomonas aeruginosa PAO1]	-0.118771	0.665872	0.827853
9949627	Methionine--tRNA ligase (EC 6.1.1.10) (Methionyl-tRNA synthetase) (MetRS)	metG	PA3482					PA3482	methionyl-tRNA synthetase [Pseudomonas aeruginosa PAO1]	-0.118934	0.370379	0.628753
9950816	Uncharacterized protein	PA4570						PA4570	hypothetical protein PA4570 [Pseudomonas aeruginosa PAO1]	-0.119302	0.929047	0.964591
9950990	Pantothenate synthetase (PS) (EC 6.3.2.1) (Pantoate--beta-alanine ligase) (Pantoate-activating enzyme)	panC	PA4730					PA4730	pantoate--beta-alanine ligase [Pseudomonas aeruginosa PAO1]	-0.119439	0.58244	0.772986
9951002	Polyribonucleotide nucleotidyltransferase (EC 2.7.7.8) (Polynucleotide phosphorylase) (PNPase)	pnp	PA4740					PA4740	polyribonucleotide nucleotidyltransferase [Pseudomonas aeruginosa PAO1]	-0.120174	0.382352	0.637524
9951373	D-aminoacyl-tRNA deacylase (EC 3.1.1.96) (D-tyrosyl-tRNA(Tyr) deacylase)	dtd	PA5079					PA5079	conserved hypothetical protein [Pseudomonas aeruginosa PAO1]	-0.120284	0.686545	0.840297
9948260	PslE	pslE	PA2235					PA2235	PslE [Pseudomonas aeruginosa PAO1]	-0.120719	0.318744	0.586102
9945974	Uncharacterized protein	PA0144						PA0144	hypothetical protein PA0144 [Pseudomonas aeruginosa PAO1]	-0.121119	0.880461	0.938785
9945844	Oxygen-dependent coproporphyrinogen-III oxidase (CPO) (Coprogen oxidase) (Coproporphyrinogenase) (EC 1.3.3.3)	hemF	PA0024					PA0024	coproporphyrinogen III oxidase, aerobic [Pseudomonas aeruginosa PAO1]	-0.121497	0.746184	0.877723
9949553	Probable dihydrolipoamide acetyltransferase	PA3415						PA3415	probable dihydrolipoamide acetyltransferase [Pseudomonas aeruginosa PAO1]	-0.121528	0.487054	0.714212
9946937	Probable porin	PA1025						PA1025	probable porin [Pseudomonas aeruginosa PAO1]	-0.121814	0.262336	0.537186
9949976	4-hydroxy-3-methylbut-2-en-1-yl diphosphate synthase (flavodoxin) (EC 1.17.7.3) (1-hydroxy-2-methyl-2-(E)-butenyl 4-diphosphate synthase)	ispG	PA3803					PA3803	probable isoprenoid biosynthetic protein GcpE [Pseudomonas aeruginosa PAO1]	-0.12276	0.292022	0.559479
9950475	50S ribosomal protein L22	rplV	PA4258					PA4258	50S ribosomal protein L22 [Pseudomonas aeruginosa PAO1]	-0.123885	0.285287	0.556203
9947621	Probable transporter	PA1651						PA1651	probable transporter [Pseudomonas aeruginosa PAO1]	-0.125637	0.992873	0.997746
9947785	ATP-dependent Clp protease ATP-binding subunit ClpX	clpX	PA1802					PA1802	ATP-dependent Clp protease ATP-binding subunit ClpX [Pseudomonas aeruginosa PAO1]	-0.125852	0.221116	0.499946
9950513	Phosphate transporter	PA4292						PA4292	probable phosphate transporter [Pseudomonas aeruginosa PAO1]	-0.126376	0.383859	0.638682
9949103	Transcription-repair-coupling factor (TRCF) (EC 3.6.4.-)	mfd	PA3002					PA3002	transcription-repair coupling protein Mfd [Pseudomonas aeruginosa PAO1]	-0.12667	0.504173	0.724331
9949274	UDP-N-acetyl-D-glucosamine 6-dehydrogenase (UDP-D-GlcNAc 6-dehydrogenase) (EC 1.1.1.136) (UDP-N-acetylglucosamine 6-dehydrogenase)	wbpA	PA3159					PA3159	UDP-N-acetyl-d-glucosamine 6-Dehydrogenase [Pseudomonas aeruginosa PAO1]	-0.126798	0.300444	0.566119
9947816	Uncharacterized protein	PA1830						PA1830	hypothetical protein PA1830 [Pseudomonas aeruginosa PAO1]	-0.12714	0.340407	0.603412
9948634	Probable chemotaxis transducer	PA2573						PA2573	probable chemotaxis transducer [Pseudomonas aeruginosa PAO1]	-0.127529	0.541159	0.751133
9950799	Type IV pilus biogenesis factor PilY1 (Pilus-associated adhesin PilY1)	pilY1	PA4554					PA4554	type 4 fimbrial biogenesis protein PilY1 [Pseudomonas aeruginosa PAO1]	-0.127766	0.656562	0.820702
9948406	Uncharacterized protein	PA2367						PA2367	hypothetical protein PA2367 [Pseudomonas aeruginosa PAO1]	-0.128116	0.289898	0.558576
9950683	Histidinol dehydrogenase (HDH) (EC 1.1.1.23)	hisD	PA4448					PA4448	histidinol dehydrogenase [Pseudomonas aeruginosa PAO1]	-0.129079	0.730707	0.868722
9949214	Type II secretion system protein N (T2SS protein N) (General secretion pathway protein N) (Protein XcpP)	xcpP	PA3104					PA3104	secretion protein XcpP [Pseudomonas aeruginosa PAO1]	-0.129437	0.599092	0.785139
9950464	50S ribosomal protein L18	rplR	PA4247					PA4247	50S ribosomal protein L18 [Pseudomonas aeruginosa PAO1]	-0.12956	0.836593	0.924284
9950638	UDP-3-O-acyl-N-acetylglucosamine deacetylase (UDP-3-O-acyl-GlcNAc deacetylase) (EC 3.5.1.108) (UDP-3-O-[R-3-hydroxymyristoyl]-N-acetylglucosamine deacetylase)	lpxC	envA	PA4406				PA4406	UDP-3-O-acyl-N-acetylglucosamine deacetylase [Pseudomonas aeruginosa PAO1]	-0.129983	0.850953	0.929782
9951423	Two-component response regulator NtrC	ntrC	PA5125					PA5125	two-component response regulator NtrC [Pseudomonas aeruginosa PAO1]	-0.130688	0.131761	0.406482
9950448	Single-stranded DNA-binding protein (SSB)	ssb	PA4232					PA4232	single-stranded DNA-binding protein [Pseudomonas aeruginosa PAO1]	-0.130705	0.575828	0.768531
9946217	Probable coniferyl aldehyde dehydrogenase (CALDH) (EC 1.2.1.68)	calB	PA0366					PA0366	probable aldehyde dehydrogenase [Pseudomonas aeruginosa PAO1]	-0.131308	0.805392	0.908953
9945988	Probable Resistance-Nodulation-Cell Division (RND) efflux membrane fusion protein	PA0157						PA0157	probable Resistance-Nodulation-Cell Division (RND) efflux membrane fusion protein precursor [Pseudomonas aeruginosa PAO1]	-0.131525	0.482602	0.711088
9947693	Type III export protein PscE (Pseudomonas secretion protein E)	pscE	PA1718					PA1718	type III export protein PscE [Pseudomonas aeruginosa PAO1]	-0.132018	0.820386	0.918412
9946276	Adenosylmethionine-8-amino-7-oxononanoate aminotransferase (EC 2.6.1.62) (7,8-diamino-pelargonic acid aminotransferase) (7,8-diaminononanoate synthase) (Diaminopelargonic acid synthase)	bioA	PA0420					PA0420	adenosylmethionine-8-amino-7-oxononanoate aminotransferase [Pseudomonas aeruginosa PAO1]	-0.132092	0.893909	0.94515
9947423	Probable short-chain dehydrogenase	PA1470						PA1470	probable short-chain dehydrogenase [Pseudomonas aeruginosa PAO1]	-0.132112	0.269492	0.545687
9951543	Probable oxidoreductase	PA5234						PA5234	probable oxidoreductase [Pseudomonas aeruginosa PAO1]	-0.132283	0.38416	0.638734
9949804	Acyl-[acyl-carrier-protein]--UDP-N-acetylglucosamine O-acyltransferase (UDP-N-acetylglucosamine acyltransferase) (EC 2.3.1.129)	lpxA	PA3644					PA3644	UDP-N-acetylglucosamine acyltransferase [Pseudomonas aeruginosa PAO1]	-0.133252	0.365667	0.626062
9950931	Probable TonB-dependent receptor	PA4675						PA4675	probable TonB-dependent receptor [Pseudomonas aeruginosa PAO1]	-0.134359	0.393622	0.645824
9951254	Adenosine diphosphate sugar pyrophosphatase	aspP	PA4971					PA4971	adenosine diphosphate sugar pyrophosphatase [Pseudomonas aeruginosa PAO1]	-0.134718	0.227058	0.504532
9951537	Uncharacterized protein	PA5229						PA5229	conserved hypothetical protein [Pseudomonas aeruginosa PAO1]	-0.134863	0.234053	0.51132
9946735	Probable oxidoreductase	PA0840						PA0840	probable oxidoreductase [Pseudomonas aeruginosa PAO1]	-0.135713	0.450862	0.690328
9949285	DNA gyrase subunit A (EC 5.99.1.3)	gyrA	PA3168					PA3168	DNA gyrase subunit A [Pseudomonas aeruginosa PAO1]	-0.13578	0.403479	0.65337
9951497	Phosphoenolpyruvate carboxykinase [ATP] (PCK) (PEP carboxykinase) (PEPCK) (EC 4.1.1.49)	pckA	PA5192					PA5192	phosphoenolpyruvate carboxykinase [Pseudomonas aeruginosa PAO1]	-0.135964	0.277654	0.55147
9951414	Regulatory protein TypA	typA	PA5117					PA5117	regulatory protein TypA [Pseudomonas aeruginosa PAO1]	-0.136161	0.188734	0.469054
9951605	Probable choline transporter	PA5291						PA5291	probable choline transporter [Pseudomonas aeruginosa PAO1]	-0.136238	0.63673	0.809358
9947095	Probable transglycolase	PA1171						PA1171	probable transglycolase [Pseudomonas aeruginosa PAO1]	-0.136306	0.152893	0.431705
9950639	Cell division protein FtsZ	ftsZ	PA4407					PA4407	cell division protein FtsZ [Pseudomonas aeruginosa PAO1]	-0.13754	0.77565	0.895506
9946967	Uncharacterized protein	PA1053						PA1053	conserved hypothetical protein [Pseudomonas aeruginosa PAO1]	-0.137872	0.16274	0.438487
9949778	DNA mismatch repair protein MutS	mutS	PA3620					PA3620	DNA mismatch repair protein MutS [Pseudomonas aeruginosa PAO1]	-0.137922	0.402914	0.652904
15595958	L-aspartate oxidase (LASPO) (EC 1.4.3.16) (Quinolinate synthase B)	nadB	PA0761					PA0761	L-aspartate oxidase [Pseudomonas aeruginosa PAO1]	-0.138795	0.336637	0.600755
9949082	Probable tolQ-type transport protein	PA2983						PA2983	probable tolQ-type transport protein [Pseudomonas aeruginosa PAO1]	-0.138959	0.249474	0.521247
9951337	Malic enzyme	PA5046						PA5046	malic enzyme [Pseudomonas aeruginosa PAO1]	-0.139359	0.678858	0.834992
9950389	Probable acetolactate synthase large subunit	PA4180						PA4180	probable acetolactate synthase large subunit [Pseudomonas aeruginosa PAO1]	-0.140109	0.621113	0.799154
9950751	UPF0271 protein PA4511	PA4511						PA4511	conserved hypothetical protein [Pseudomonas aeruginosa PAO1]	-0.140691	0.770707	0.893226
9946447	RNA polymerase sigma factor RpoD (Sigma-70)	rpoD	rpoDA	PA0576				PA0576	sigma factor RpoD [Pseudomonas aeruginosa PAO1]	-0.140698	0.535271	0.746886
9946204	Uncharacterized protein	PA0354						PA0354	conserved hypothetical protein [Pseudomonas aeruginosa PAO1]	-0.14078	0.254388	0.526234
9951008	Ribosome maturation factor RimP	rimP	PA4746					PA4746	conserved hypothetical protein [Pseudomonas aeruginosa PAO1]	-0.141599	0.270605	0.54747
9947009	B-type flagellin	fliC	PA1092					PA1092	flagellin type B [Pseudomonas aeruginosa PAO1]	-0.142828	0.293039	0.559761
9951522	Aminomethyltransferase (EC 2.1.2.10) (Glycine cleavage system T protein)	gcvT	PA5215					PA5215	glycine-cleavage system protein T1 [Pseudomonas aeruginosa PAO1]	-0.143736	0.401778	0.652904
9947231	YcgL domain-containing protein PA1295	PA1295						PA1295	conserved hypothetical protein [Pseudomonas aeruginosa PAO1]	-0.144312	0.495233	0.720866
9951123	tRNA-dihydrouridine synthase B (EC 1.3.1.-)	dusB	PA4852					PA4852	conserved hypothetical protein [Pseudomonas aeruginosa PAO1]	-0.144946	0.643177	0.811514
9949889	Probable FMN oxidoreductase	PA3723						PA3723	probable FMN oxidoreductase [Pseudomonas aeruginosa PAO1]	-0.145099	0.165149	0.442584
9950178	Leucine--tRNA ligase (EC 6.1.1.4) (Leucyl-tRNA synthetase) (LeuRS)	leuS	PA3987					PA3987	leucyl-tRNA synthetase [Pseudomonas aeruginosa PAO1]	-0.147528	0.252987	0.524409
9951828	DNA polymerase I (POL I) (EC 2.7.7.7)	polA	PA5493					PA5493	DNA polymerase I [Pseudomonas aeruginosa PAO1]	-0.148191	0.321675	0.588284
9947886	Uncharacterized protein	PA1894						PA1894	hypothetical protein PA1894 [Pseudomonas aeruginosa PAO1]	-0.148317	0.175589	0.455567
9951053	Probable transcriptional regulator	PA4787						PA4787	probable transcriptional regulator [Pseudomonas aeruginosa PAO1]	-0.148482	0.185738	0.464541
9948692	Uncharacterized protein	PA2625						PA2625	conserved hypothetical protein [Pseudomonas aeruginosa PAO1]	-0.148543	0.173842	0.453393
9949791	Uncharacterized protein	PA3632						PA3632	conserved hypothetical protein [Pseudomonas aeruginosa PAO1]	-0.148561	0.527146	0.739947
9948680	Outer-membrane lipoprotein carrier protein	lolA	PA2614					PA2614	periplasmic chaperone LolA [Pseudomonas aeruginosa PAO1]	-0.149313	0.892846	0.944578
9949719	Uncharacterized protein	PA3566						PA3566	conserved hypothetical protein [Pseudomonas aeruginosa PAO1]	-0.149561	0.347363	0.609304
9949850	Adenylate kinase (AK) (EC 2.7.4.3) (ATP-AMP transphosphorylase) (ATP:AMP phosphotransferase) (Adenylate monophosphate kinase)	adk	PA3686					PA3686	adenylate kinase [Pseudomonas aeruginosa PAO1]	-0.149694	0.283904	0.554108
9946869	Probable dna-binding stress protein	PA0962						PA0962	probable dna-binding stress protein [Pseudomonas aeruginosa PAO1]	-0.150295	0.840985	0.926783
9949800	DNA polymerase III subunit alpha (EC 2.7.7.7)	dnaE	PA3640					PA3640	DNA polymerase III, alpha chain [Pseudomonas aeruginosa PAO1]	-0.15205	0.229652	0.507882
9949642	Uncharacterized protein	PA3496						PA3496	hypothetical protein PA3496 [Pseudomonas aeruginosa PAO1]	-0.152338	0.784719	0.900253
9949097	Na(+)-translocating NADH-quinone reductase subunit C (Na(+)-NQR subunit C) (Na(+)-translocating NQR subunit C) (EC 1.6.5.8) (NQR complex subunit C) (NQR-1 subunit C)	nqrC	PA2997					PA2997	Na+-translocating NADH:ubiquinone oxidoreductase subunit Nrq3 [Pseudomonas aeruginosa PAO1]	-0.152366	0.279572	0.552823
48425764	Cell division protein ZapA (Z ring-associated protein ZapA)	zapA	PA5227					PA5227	Chain A, Unknown Conserved Bacterial Protein From Pseudomonas Aeruginosa Pao1	-0.152805	0.794391	0.905394
9949152	Probable D-alanyl-D-alanine carboxypeptidase	PA3047						PA3047	probable D-alanyl-D-alanine carboxypeptidase [Pseudomonas aeruginosa PAO1]	-0.15322	0.276762	0.55147
9950480	50S ribosomal protein L3	rplC	PA4263					PA4263	50S ribosomal protein L3 [Pseudomonas aeruginosa PAO1]	-0.153431	0.289627	0.558576
9948966	Orotidine 5'-phosphate decarboxylase (EC 4.1.1.23) (OMP decarboxylase) (OMPDCase) (OMPdecase)	pyrF	PA2876					PA2876	orotidine 5'-phosphate decarboxylase [Pseudomonas aeruginosa PAO1]	-0.154956	0.303365	0.568899
9947241	Probable oligopeptidase	PA1304						PA1304	probable oligopeptidase [Pseudomonas aeruginosa PAO1]	-0.155336	0.347987	0.609494
9951240	FimX	fimX	PA4959					PA4959	FimX [Pseudomonas aeruginosa PAO1]	-0.155488	0.776831	0.896431
9950950	Phosphatidylserine synthase	pssA	PA4693					PA4693	phosphatidylserine synthase [Pseudomonas aeruginosa PAO1]	-0.155753	0.918187	0.956682
9951327	Uncharacterized protein	PA5037						PA5037	hypothetical protein PA5037 [Pseudomonas aeruginosa PAO1]	-0.15583	0.19674	0.474952
9951410	Uncharacterized protein	PA5113						PA5113	hypothetical protein PA5113 [Pseudomonas aeruginosa PAO1]	-0.156284	0.355226	0.614865
9950466	30S ribosomal protein S8	rpsH	PA4249					PA4249	30S ribosomal protein S8 [Pseudomonas aeruginosa PAO1]	-0.156465	0.202896	0.480987
9951741	Uncharacterized protein	PA5414						PA5414	hypothetical protein PA5414 [Pseudomonas aeruginosa PAO1]	-0.156808	0.376454	0.633957
9946791	Uncharacterized protein	PA0891						PA0891	hypothetical protein PA0891 [Pseudomonas aeruginosa PAO1]	-0.157006	0.825396	0.91966
9946268	Component of chemotactic signal transduction system	chpA	PA0413					PA0413	component of chemotactic signal transduction system [Pseudomonas aeruginosa PAO1]	-0.157034	0.176281	0.45636
9946690	Phospholipid methyltransferase	pmtA	PA0798					PA0798	phospholipid methyltransferase [Pseudomonas aeruginosa PAO1]	-0.157211	0.917701	0.956682
9949689	UPF0246 protein PA3539	PA3539						PA3539	conserved hypothetical protein [Pseudomonas aeruginosa PAO1]	-0.157321	0.384764	0.638839
9948874	Uncharacterized protein	PA2792						PA2792	hypothetical protein PA2792 [Pseudomonas aeruginosa PAO1]	-0.158758	0.341755	0.603892
9949091	Soluble pyridine nucleotide transhydrogenase (STH) (EC 1.6.1.1) (NAD(P)(+) transhydrogenase [B-specific])	sthA	sth	PA2991				PA2991	soluble pyridine nucleotide transhydrogenase [Pseudomonas aeruginosa PAO1]	-0.159143	0.198414	0.475911
9946804	Alanine--tRNA ligase (EC 6.1.1.7) (Alanyl-tRNA synthetase) (AlaRS)	alaS	PA0903					PA0903	alanyl-tRNA synthetase [Pseudomonas aeruginosa PAO1]	-0.159676	0.190628	0.469285
9951154	Probable bacterioferritin	PA4880						PA4880	probable bacterioferritin [Pseudomonas aeruginosa PAO1]	-0.161441	0.812587	0.912592
9950803	Peptidyl-prolyl cis-trans isomerase (EC 5.2.1.8)	PA4558						PA4558	probable peptidyl-prolyl cis-trans isomerase, FkbP-type [Pseudomonas aeruginosa PAO1]	-0.163567	0.354881	0.614728
9951451	Probable short-chain dehydrogenase	PA5150						PA5150	probable short-chain dehydrogenase [Pseudomonas aeruginosa PAO1]	-0.16408	0.772797	0.893565
9946090	Uncharacterized protein	PA0250						PA0250	conserved hypothetical protein [Pseudomonas aeruginosa PAO1]	-0.164216	0.729887	0.868722
9949060	Thymidylate kinase (EC 2.7.4.9) (dTMP kinase)	tmk	PA2962					PA2962	thymidylate kinase [Pseudomonas aeruginosa PAO1]	-0.165003	0.29533	0.562259
9950452	Bacterioferritin (BFR) (EC 1.16.3.1)	bfr	bfrA	PA4235				PA4235	bacterioferritin [Pseudomonas aeruginosa PAO1]	-0.165412	0.852094	0.929782
9946770	Pterin-4-alpha-carbinolamine dehydratase (PHS) (EC 4.2.1.96) (4-alpha-hydroxy-tetrahydropterin dehydratase) (Pterin carbinolamine dehydratase) (PCD)	phhB	PA0871					PA0871	pterin-4-alpha-carbinolamine dehydratase [Pseudomonas aeruginosa PAO1]	-0.165634	0.398756	0.651557
9949776	Uncharacterized protein	PA3618						PA3618	conserved hypothetical protein [Pseudomonas aeruginosa PAO1]	-0.165897	0.445448	0.686938
270346535	Thiol:disulfide interchange protein DsbA	dsbA	PA5489					PA5489	Chain A, Crystal Structure Of Pseudomonas Aeruginosa Dsba	-0.166479	0.795201	0.905394
9950909	Ferrochelatase (EC 4.99.1.1) (Heme synthase) (Protoheme ferro-lyase)	hemH	PA4655					PA4655	ferrochelatase [Pseudomonas aeruginosa PAO1]	-0.167092	0.319337	0.586736
9951298	Heptosyltransferase II	waaF	PA5012					PA5012	heptosyltransferase II [Pseudomonas aeruginosa PAO1]	-0.167595	0.606086	0.788762
9950615	60 kDa chaperonin (GroEL protein) (Protein Cpn60)	groL	groEL	mopA	PA4385			PA4385	GroEL protein [Pseudomonas aeruginosa PAO1]	-0.168343	0.36205	0.621219
9946287	Methylenetetrahydrofolate reductase (EC 1.5.1.20)	metF	PA0430					PA0430	5,10-methylenetetrahydrofolate reductase [Pseudomonas aeruginosa PAO1]	-0.168457	0.404521	0.654609
9951551	Polyphosphate kinase (EC 2.7.4.1) (ATP-polyphosphate phosphotransferase) (Polyphosphoric acid kinase)	ppk	PA5242					PA5242	polyphosphate kinase [Pseudomonas aeruginosa PAO1]	-0.168811	0.411944	0.659837
9947088	PcpS	pcpS	PA1165					PA1165	PcpS [Pseudomonas aeruginosa PAO1]	-0.169415	0.485608	0.713454
9946542	Uncharacterized protein	PA0664						PA0664	hypothetical protein PA0664 [Pseudomonas aeruginosa PAO1]	-0.169711	0.504362	0.724331
9947487	DNA ligase (EC 6.5.1.2) (Polydeoxyribonucleotide synthase [NAD(+)])	ligA	PA1529					PA1529	DNA ligase [Pseudomonas aeruginosa PAO1]	-0.169977	0.832173	0.92297
9948942	Uncharacterized protein	PA2854						PA2854	conserved hypothetical protein [Pseudomonas aeruginosa PAO1]	-0.170342	0.255206	0.526403
9946765	Membrane-bound lysozyme inhibitor of C-type lysozyme	mliC	PA0867					PA0867	membrane-bound lysozyme inhibitor of c-type lysozyme MliC [Pseudomonas aeruginosa PAO1]	-0.170372	0.841966	0.926783
9950477	50S ribosomal protein L2	rplB	PA4260					PA4260	50S ribosomal protein L2 [Pseudomonas aeruginosa PAO1]	-0.170464	0.744244	0.877702
9949898	Uncharacterized protein	PA3731						PA3731	conserved hypothetical protein [Pseudomonas aeruginosa PAO1]	-0.170669	0.376836	0.634148
9946728	Uncharacterized protein	PA0833						PA0833	hypothetical protein PA0833 [Pseudomonas aeruginosa PAO1]	-0.170923	0.375052	0.633208
9948003	Acetyl-CoA acetyltransferase (EC 2.3.1.9) (Acetoacetyl-CoA thiolase)	atoB	PA2001					PA2001	acetyl-CoA acetyltransferase [Pseudomonas aeruginosa PAO1]	-0.171172	0.702902	0.851052
9945826	Glycine--tRNA ligase beta subunit (EC 6.1.1.14) (Glycyl-tRNA synthetase beta subunit) (GlyRS)	glyS	PA0008					PA0008	glycyl-tRNA synthetase beta chain [Pseudomonas aeruginosa PAO1]	-0.171923	0.32369	0.588975
9951691	Phosphate-binding protein PstS	pstS	PA5369					PA5369	phosphate ABC transporter, periplasmic phosphate-binding protein, PstS [Pseudomonas aeruginosa PAO1]	-0.172232	0.799587	0.906301
9947230	Ribonuclease D (RNase D) (EC 3.1.13.5)	rnd	PA1294					PA1294	ribonuclease D [Pseudomonas aeruginosa PAO1]	-0.172565	0.821576	0.918434
9949224	N-(5'-phosphoribosyl)anthranilate isomerase (PRAI) (EC 5.3.1.24)	trpF	PA3113					PA3113	N-(5'phosphoribosyl)anthranilate (PRA) isomerase [Pseudomonas aeruginosa PAO1]	-0.172898	0.371544	0.630184
9948897	Probable glutathione S-transferase	PA2813						PA2813	probable glutathione S-transferase [Pseudomonas aeruginosa PAO1]	-0.173427	0.388269	0.6415
9949567	Probable short-chain dehydrogenase	PA3427						PA3427	probable short-chain dehydrogenase [Pseudomonas aeruginosa PAO1]	-0.173724	0.541722	0.751472
9946240	Non-canonical purine NTP pyrophosphatase (EC 3.6.1.19) (Non-standard purine NTP pyrophosphatase) (Nucleoside-triphosphate diphosphatase) (Nucleoside-triphosphate pyrophosphatase) (NTPase)	PA0387						PA0387	conserved hypothetical protein [Pseudomonas aeruginosa PAO1]	-0.173903	0.538116	0.74867
9949055	Probable transcriptional regulator	PA2957						PA2957	probable transcriptional regulator [Pseudomonas aeruginosa PAO1]	-0.176771	0.3079	0.573758
9946155	Uncharacterized protein	PA0309						PA0309	hypothetical protein PA0309 [Pseudomonas aeruginosa PAO1]	-0.177013	0.215726	0.494547
9949123	Probable soluble lytic transglycosylase	PA3020						PA3020	probable soluble lytic transglycosylase [Pseudomonas aeruginosa PAO1]	-0.17749	0.619802	0.798338
9948651	Probable transcriptional regulator	PA2588						PA2588	probable transcriptional regulator [Pseudomonas aeruginosa PAO1]	-0.177744	0.544667	0.754228
9951449	Uncharacterized protein	PA5149						PA5149	conserved hypothetical protein [Pseudomonas aeruginosa PAO1]	-0.177942	0.389346	0.64238
9946420	Phosphoglycerate kinase (EC 2.7.2.3)	pgk	PA0552					PA0552	phosphoglycerate kinase [Pseudomonas aeruginosa PAO1]	-0.179468	0.22679	0.504532
9949903	Homoserine dehydrogenase (HDH) (EC 1.1.1.3)	hom	PA3736					PA3736	homoserine dehydrogenase [Pseudomonas aeruginosa PAO1]	-0.179504	0.378224	0.634752
9945898	Serine/threonine protein kinase PpkA	ppkA	PA0074					PA0074	serine/threonine protein kinase PpkA [Pseudomonas aeruginosa PAO1]	-0.179701	0.117196	0.385377
9948676	Siroheme synthase [Includes: Uroporphyrinogen-III C-methyltransferase (Urogen III methylase) (EC 2.1.1.107) (SUMT) (Uroporphyrinogen III methylase) (UROM); Precorrin-2 dehydrogenase (EC 1.3.1.76); Sirohydrochlorin ferrochelatase (EC 4.99.1.4)]	cysG	PA2611					PA2611	siroheme synthase [Pseudomonas aeruginosa PAO1]	-0.180463	0.181969	0.460975
9950789	Outer membrane protein assembly factor BamD	bamD	PA4545					PA4545	competence protein ComL [Pseudomonas aeruginosa PAO1]	-0.180506	0.47512	0.707897
9950684	ATP phosphoribosyltransferase (ATP-PRT) (ATP-PRTase) (EC 2.4.2.17)	hisG	PA4449					PA4449	ATP-phosphoribosyltransferase [Pseudomonas aeruginosa PAO1]	-0.181382	0.254536	0.526234
9946285	ATP-dependent RNA helicase RhlE (EC 3.6.4.13)	rhlE	PA0428					PA0428	probable ATP-dependent RNA helicase [Pseudomonas aeruginosa PAO1]	-0.181462	0.451157	0.690332
9947549	Dihydrolipoyllysine-residue succinyltransferase component of 2-oxoglutarate dehydrogenase complex (EC 2.3.1.61) (2-oxoglutarate dehydrogenase complex component E2) (OGDC-E2) (Dihydrolipoamide succinyltransferase component of 2-oxoglutarate dehydrogenase complex)	sucB	PA1586					PA1586	dihydrolipoamide succinyltransferase (E2 subunit) [Pseudomonas aeruginosa PAO1]	-0.181519	0.350209	0.611414
9950921	Glutamyl-tRNA reductase (GluTR) (EC 1.2.1.70)	hemA	PA4666					PA4666	glutamyl-tRNA reductase [Pseudomonas aeruginosa PAO1]	-0.181619	0.300995	0.566705
9951620	D-amino acid dehydrogenase 1 (EC 1.4.99.-) (D-alanine dehydrogenase 1)	dadA1	dadA	PA5304				PA5304	D-amino acid dehydrogenase, small subunit [Pseudomonas aeruginosa PAO1]	-0.182176	0.371993	0.630492
9945970	Alkyl hydroperoxide reductase subunit F (EC 1.8.1.-)	ahpF	PA0140					PA0140	alkyl hydroperoxide reductase subunit F [Pseudomonas aeruginosa PAO1]	-0.183052	0.221706	0.499951
9950884	Uncharacterized protein	PA4631						PA4631	hypothetical protein PA4631 [Pseudomonas aeruginosa PAO1]	-0.183252	0.177698	0.458254
15599920	CbrB	cbrB							two-component response regulator CbrB [Pseudomonas aeruginosa PAO1]	-0.183533	0.338827	0.603361
9949151	Uncharacterized protein	PA3046						PA3046	conserved hypothetical protein [Pseudomonas aeruginosa PAO1]	-0.183578	0.870597	0.935765
9946907	PqsC	pqsC	PA0998					PA0998	PqsC [Pseudomonas aeruginosa PAO1]	-0.18364	0.732659	0.870124
9950655	Ribosomal RNA small subunit methyltransferase I (EC 2.1.1.198) (16S rRNA 2'-O-ribose C1402 methyltransferase) (rRNA (cytidine-2'-O-)-methyltransferase RsmI)	rsmI	PA4422					PA4422	conserved hypothetical protein [Pseudomonas aeruginosa PAO1]	-0.18393	0.373048	0.631827
9950984	Glutamyl-Q tRNA(Asp) synthetase (Glu-Q-RSs) (EC 6.1.1.-)	gluQ	PA4724					PA4724	probable aminoacyl-transfer RNA synthetase (class I) [Pseudomonas aeruginosa PAO1]	-0.184399	0.582061	0.772917
9949852	Uncharacterized protein	PA3688						PA3688	hypothetical protein PA3688 [Pseudomonas aeruginosa PAO1]	-0.184876	0.712875	0.855233
9949051	Uncharacterized protein	PA2954						PA2954	hypothetical protein PA2954 [Pseudomonas aeruginosa PAO1]	-0.185142	0.119151	0.389633
9947484	Probable transcriptional regulator	PA1526						PA1526	probable transcriptional regulator [Pseudomonas aeruginosa PAO1]	-0.185315	0.171486	0.450868
9950763	Uncharacterized protein	PA4521						PA4521	hypothetical protein PA4521 [Pseudomonas aeruginosa PAO1]	-0.185531	0.269288	0.545687
9946637	Uracil-DNA glycosylase (UDG) (EC 3.2.2.27)	ung	PA0750					PA0750	uracil-DNA glycosylase [Pseudomonas aeruginosa PAO1]	-0.186034	0.788266	0.901694
9950768	Type 4 fimbrial assembly protein PilB	pilB	PA4526					PA4526	type 4 fimbrial biogenesis protein PilB [Pseudomonas aeruginosa PAO1]	-0.186202	0.312586	0.578836
9951592	Uncharacterized protein	PA5279						PA5279	conserved hypothetical protein [Pseudomonas aeruginosa PAO1]	-0.186356	0.777725	0.896587
9950665	30S ribosomal protein S9	rpsI	PA4432					PA4432	30S ribosomal protein S9 [Pseudomonas aeruginosa PAO1]	-0.186409	0.833656	0.923324
9951026	Protein GrpE (HSP-70 cofactor)	grpE	PA4762					PA4762	heat shock protein GrpE [Pseudomonas aeruginosa PAO1]	-0.187054	0.383193	0.638416
9948690	Isocitrate dehydrogenase [NADP] (EC 1.1.1.42)	icd	PA2623					PA2623	isocitrate dehydrogenase [Pseudomonas aeruginosa PAO1]	-0.187469	0.387595	0.641284
9949229	Aspartate-semialdehyde dehydrogenase (ASA dehydrogenase) (ASADH) (EC 1.2.1.11) (Aspartate-beta-semialdehyde dehydrogenase)	asd	PA3117					PA3117	aspartate semialdehyde dehydrogenase [Pseudomonas aeruginosa PAO1]	-0.188342	0.511524	0.728911
9948430	PvdR	pvdR	PA2389					PA2389	PvdR [Pseudomonas aeruginosa PAO1]	-0.18835	0.28141	0.553097
9949920	Phosphoribosylglycinamide formyltransferase 2 (GART 2) (EC 2.1.2.-) (5'-phosphoribosylglycinamide transformylase 2) (Formate-dependent GAR transformylase) (GAR transformylase 2)	purT	PA3751					PA3751	phosphoribosylglycinamide formyltransferase 2 [Pseudomonas aeruginosa PAO1]	-0.188477	0.181222	0.460975
9951417	Glutamine synthetase (EC 6.3.1.2) (Glutamate--ammonia ligase)	glnA	PA5119					PA5119	glutamine synthetase [Pseudomonas aeruginosa PAO1]	-0.188667	0.236526	0.511858
9951602	Nitrogen regulatory protein P-II 2	glnK	PA5288					PA5288	nitrogen regulatory protein P-II 2 [Pseudomonas aeruginosa PAO1]	-0.189738	0.165634	0.442596
9948051	Uncharacterized protein	PA2044						PA2044	hypothetical protein PA2044 [Pseudomonas aeruginosa PAO1]	-0.189943	0.972086	0.988003
9950927	50S ribosomal protein L25 (General stress protein CTC)	rplY	ctc	PA4671				PA4671	probable ribosomal protein L25 [Pseudomonas aeruginosa PAO1]	-0.190326	0.118553	0.388217
9947996	Uncharacterized protein	PA1994						PA1994	hypothetical protein PA1994 [Pseudomonas aeruginosa PAO1]	-0.190726	0.864896	0.934568
9948908	Uncharacterized protein	PA2823						PA2823	conserved hypothetical protein [Pseudomonas aeruginosa PAO1]	-0.190966	0.162691	0.438487
9950473	50S ribosomal protein L16	rplP	PA4256					PA4256	50S ribosomal protein L16 [Pseudomonas aeruginosa PAO1]	-0.19106	0.231911	0.509484
9948784	Cysteine synthase (EC 2.5.1.47)	cysK	PA2709					PA2709	cysteine synthase A [Pseudomonas aeruginosa PAO1]	-0.19138	0.165563	0.442596
9948656	Probable periplasmic spermidine/putrescine-binding protein	PA2592						PA2592	probable periplasmic spermidine/putrescine-binding protein [Pseudomonas aeruginosa PAO1]	-0.191561	0.507751	0.725665
9951300	Glutamate-ammonia-ligase adenylyltransferase (EC 2.7.7.42) (Glutamine-synthetase adenylyltransferase) (ATase) ([Glutamate--ammonia-ligase] adenylyltransferase)	glnE	PA5014					PA5014	glutamate-ammonia-ligase adenylyltransferase [Pseudomonas aeruginosa PAO1]	-0.192404	0.137054	0.413253
9950009	Valine--tRNA ligase (EC 6.1.1.9) (Valyl-tRNA synthetase) (ValRS)	valS	PA3834					PA3834	valyl-tRNA synthetase [Pseudomonas aeruginosa PAO1]	-0.192667	0.22407	0.502504
15599394	Probable acyl-CoA dehydrogenase	PA4199						PA4199	acyl-CoA dehydrogenase [Pseudomonas aeruginosa PAO1]	-0.193058	0.519528	0.734495
9951842	Uncharacterized protein	PA5506						PA5506	hypothetical protein PA5506 [Pseudomonas aeruginosa PAO1]	-0.193578	0.235028	0.511419
9949724	Methylmalonate-semialdehyde dehydrogenase [acylating] (MMSDH) (EC 1.2.1.27)	mmsA	PA3570					PA3570	methylmalonate-semialdehyde dehydrogenase [Pseudomonas aeruginosa PAO1]	-0.193708	0.333412	0.597368
9951011	Phosphoglucosamine mutase (EC 5.4.2.10)	glmM	PA4749					PA4749	phosphoglucosamine mutase [Pseudomonas aeruginosa PAO1]	-0.194026	0.36795	0.628753
9951652	Uncharacterized protein	PA5333						PA5333	conserved hypothetical protein [Pseudomonas aeruginosa PAO1]	-0.194153	0.399323	0.651557
9949979	Dual-specificity RNA methyltransferase RlmN (EC 2.1.1.192) (23S rRNA (adenine(2503)-C(2))-methyltransferase) (23S rRNA m2A2503 methyltransferase) (Ribosomal RNA large subunit methyltransferase N) (tRNA (adenine(37)-C(2))-methyltransferase) (tRNA m2A37 methyltransferase)	rlmN	PA3806					PA3806	conserved hypothetical protein [Pseudomonas aeruginosa PAO1]	-0.19428	0.420912	0.668427
9948622	Uncharacterized protein	PA2562						PA2562	hypothetical protein PA2562 [Pseudomonas aeruginosa PAO1]	-0.195048	0.825067	0.91966
9951210	Replicative DNA helicase (EC 3.6.4.12)	dnaB	PA4931					PA4931	replicative DNA helicase [Pseudomonas aeruginosa PAO1]	-0.195083	0.252298	0.524233
9950791	Type 4 fimbriae expression regulatory protein PilR	pilR	PA4547					PA4547	two-component response regulator PilR [Pseudomonas aeruginosa PAO1]	-0.195818	0.190617	0.469285
9948821	Translation initiation factor IF-3	infC	PA2743					PA2743	translation initiation factor IF-3 [Pseudomonas aeruginosa PAO1]	-0.196113	0.231451	0.509484
9946009	Aerotaxis transducer Aer2	aer2	PA0176					PA0176	aerotaxis transducer Aer2 [Pseudomonas aeruginosa PAO1]	-0.196456	0.156565	0.433414
9950453	Catalase (EC 1.11.1.6)	katA	PA4236					PA4236	catalase [Pseudomonas aeruginosa PAO1]	-0.196682	0.160928	0.437336
9951119	Biotin carboxylase (EC 6.3.4.14) (Acetyl-CoA carboxylase subunit A) (ACC) (EC 6.4.1.2)	accC	fabG	PA4848				PA4848	biotin carboxylase [Pseudomonas aeruginosa PAO1]	-0.196873	0.198879	0.476221
9951786	Uncharacterized protein	PA5455						PA5455	hypothetical protein PA5455 [Pseudomonas aeruginosa PAO1]	-0.197036	0.264181	0.538662
9950680	GTP cyclohydrolase 1 type 2 homolog	PA4445						PA4445	conserved hypothetical protein [Pseudomonas aeruginosa PAO1]	-0.197598	0.170743	0.449413
9949861	Uncharacterized protein	PA3696						PA3696	conserved hypothetical protein [Pseudomonas aeruginosa PAO1]	-0.19762	0.306775	0.573018
9946165	Uncharacterized protein	PA0318						PA0318	conserved hypothetical protein [Pseudomonas aeruginosa PAO1]	-0.197956	0.711368	0.854532
83754979	Probable acetyltransferase	PA4026						PA4026	Chain A, Crystal Structure Of A Probable Acetyltransferase	-0.198016	0.290999	0.558576
9950864	Catalase (EC 1.11.1.6) (Paraquat-inducible catalase isozyme B)	katB	PA4613					PA4613	catalase [Pseudomonas aeruginosa PAO1]	-0.198284	0.49108	0.717476
9947410	Probable two-component sensor	PA1458						PA1458	probable two-component sensor [Pseudomonas aeruginosa PAO1]	-0.198568	0.169043	0.446432
9946841	Lipopolysaccharide biosynthetic protein LpxO2	lpxO2	PA0936					PA0936	lipopolysaccharide biosynthetic protein LpxO2 [Pseudomonas aeruginosa PAO1]	-0.198972	0.652346	0.817944
9946683	Propionate catabolic protein PrpD	prpD	PA0792					PA0792	propionate catabolic protein PrpD [Pseudomonas aeruginosa PAO1]	-0.199232	0.137025	0.413253
9950858	Uncharacterized protein	PA4607						PA4607	hypothetical protein PA4607 [Pseudomonas aeruginosa PAO1]	-0.200122	0.805122	0.908953
9946696	Probable oxidoreductase	PA0804						PA0804	probable oxidoreductase [Pseudomonas aeruginosa PAO1]	-0.20024	0.176082	0.456345
9950174	Uncharacterized protein	PA3983						PA3983	conserved hypothetical protein [Pseudomonas aeruginosa PAO1]	-0.200941	0.476057	0.708177
9946140	Probable glutamine synthetase	spuI	PA0296					PA0296	probable glutamine synthetase [Pseudomonas aeruginosa PAO1]	-0.20104	0.693453	0.845683
9949133	Molybdenum cofactor biosynthesis protein B	moaB2	PA3029					PA3029	molybdopterin biosynthetic protein B2 [Pseudomonas aeruginosa PAO1]	-0.201157	0.377233	0.634364
9947871	Probable oxidoreductase	PA1880						PA1880	probable oxidoreductase [Pseudomonas aeruginosa PAO1]	-0.201696	0.683392	0.837637
9946458	UPF0229 protein PA0587	PA0587						PA0587	conserved hypothetical protein [Pseudomonas aeruginosa PAO1]	-0.201767	0.158502	0.435244
9947039	Diguanylate cyclase TpbB	tpbB	PA1120					PA1120	diguanylate cyclase TpbB [Pseudomonas aeruginosa PAO1]	-0.201871	0.619464	0.798337
9948399	Uncharacterized protein	PA2361						PA2361	hypothetical protein PA2361 [Pseudomonas aeruginosa PAO1]	-0.202444	0.636581	0.809358
9950767	Fimbrial protein (Pilin)	pilA	fimA	PA4525				PA4525	type 4 fimbrial precursor PilA [Pseudomonas aeruginosa PAO1]	-0.202512	0.198548	0.475911
9947030	Uncharacterized protein	PA1112						PA1112	conserved hypothetical protein [Pseudomonas aeruginosa PAO1]	-0.20252	0.997855	0.998596
9946328	Uncharacterized protein	PA0467						PA0467	conserved hypothetical protein [Pseudomonas aeruginosa PAO1]	-0.202906	0.105448	0.369158
9950642	D-alanine--D-alanine ligase B (EC 6.3.2.4) (D-Ala-D-Ala ligase B) (D-alanylalanine synthetase B)	ddlB	PA4410					PA4410	D-alanine--D-alanine ligase [Pseudomonas aeruginosa PAO1]	-0.203238	0.960954	0.98242
9946956	Uncharacterized protein	PA1043						PA1043	hypothetical protein PA1043 [Pseudomonas aeruginosa PAO1]	-0.203299	0.159591	0.4356
9950390	Uncharacterized protein	PA4181						PA4181	hypothetical protein PA4181 [Pseudomonas aeruginosa PAO1]	-0.20338	0.977811	0.991382
9949263	Probable glycosyltransferase WbpH	wbpH	PA3149					PA3149	probable glycosyltransferase WbpH [Pseudomonas aeruginosa PAO1]	-0.203558	0.233194	0.510733
9950719	Rod shape-determining protein MreB	mreB	PA4481					PA4481	rod shape-determining protein MreB [Pseudomonas aeruginosa PAO1]	-0.204576	0.501639	0.724331
9948804	Uncharacterized protein	PA2728						PA2728	hypothetical protein PA2728 [Pseudomonas aeruginosa PAO1]	-0.205374	0.335921	0.600386
9946274	Uncharacterized protein	PA0418						PA0418	hypothetical protein PA0418 [Pseudomonas aeruginosa PAO1]	-0.205838	0.513374	0.729863
9947085	Succinyl-diaminopimelate desuccinylase (SDAP desuccinylase) (EC 3.5.1.18) (N-succinyl-LL-2,6-diaminoheptanedioate amidohydrolase)	dapE	PA1162					PA1162	succinyl-diaminopimelate desuccinylase [Pseudomonas aeruginosa PAO1]	-0.206169	0.745636	0.877723
9946370	Probable acyl-CoA dehydrogenase	PA0506						PA0506	probable acyl-CoA dehydrogenase [Pseudomonas aeruginosa PAO1]	-0.206359	0.389776	0.642407
9947792	Probable permease of ABC transporter	PA1808						PA1808	probable permease of ABC transporter [Pseudomonas aeruginosa PAO1]	-0.206536	0.229956	0.507882
9950626	UPF0234 protein PA4395	PA4395						PA4395	conserved hypothetical protein [Pseudomonas aeruginosa PAO1]	-0.206889	0.316396	0.583602
9950635	Protein translocase subunit SecA	secA	PA4403					PA4403	secretion protein SecA [Pseudomonas aeruginosa PAO1]	-0.207097	0.185574	0.464541
9946842	Uncharacterized protein	PA0937						PA0937	conserved hypothetical protein [Pseudomonas aeruginosa PAO1]	-0.207105	0.42748	0.672406
9949074	Ribosomal large subunit pseudouridine synthase C (EC 5.4.99.24) (23S rRNA pseudouridine(955/2504/2580) synthase) (rRNA pseudouridylate synthase C) (rRNA-uridine isomerase C)	rluC	PA2975					PA2975	ribosomal large subunit pseudouridine synthase C [Pseudomonas aeruginosa PAO1]	-0.208005	0.246997	0.518626
9950694	Uncharacterized protein	PA4458						PA4458	conserved hypothetical protein [Pseudomonas aeruginosa PAO1]	-0.208096	0.196313	0.474406
9946277	Uncharacterized protein	PA0421						PA0421	hypothetical protein PA0421 [Pseudomonas aeruginosa PAO1]	-0.208281	0.58722	0.776709
9946324	Two-component response regulator CreB	creB	PA0463					PA0463	two-component response regulator CreB [Pseudomonas aeruginosa PAO1]	-0.208785	0.0838629	0.336762
9951248	Uncharacterized protein	PA4966						PA4966	hypothetical protein PA4966 [Pseudomonas aeruginosa PAO1]	-0.209111	0.272553	0.548809
9950732	RoxR	roxR	PA4493					PA4493	RoxR [Pseudomonas aeruginosa PAO1]	-0.209187	0.575773	0.768531
9949334	Uncharacterized protein	PA3214						PA3214	hypothetical protein PA3214 [Pseudomonas aeruginosa PAO1]	-0.209395	0.252627	0.524233
9950164	Lost Adherence Sensor, LadS	ladS	PA3974					PA3974	Lost Adherence Sensor, LadS [Pseudomonas aeruginosa PAO1]	-0.209611	0.454242	0.693704
9948002	DhcB, dehydrocarnitine CoA transferase, subunit B	dhcB	PA2000					PA2000	DhcB, dehydrocarnitine CoA transferase, subunit B [Pseudomonas aeruginosa PAO1]	-0.209687	0.575526	0.768531
9947547	Succinate dehydrogenase (B subunit)	sdhB	PA1584					PA1584	succinate dehydrogenase (B subunit) [Pseudomonas aeruginosa PAO1]	-0.210426	0.750059	0.879558
9947791	Probable ATP-binding component of ABC transporter	PA1807						PA1807	probable ATP-binding component of ABC transporter [Pseudomonas aeruginosa PAO1]	-0.210795	0.134142	0.409445
9951228	Uncharacterized protein	PA4948						PA4948	conserved hypothetical protein [Pseudomonas aeruginosa PAO1]	-0.211245	0.179933	0.460887
9951524	Probable binding protein component of ABC iron transporter PA5217	PA5217						PA5217	probable binding protein component of ABC iron transporter [Pseudomonas aeruginosa PAO1]	-0.212302	0.130665	0.406482
9948336	AmbC	ambC	PA2304					PA2304	AmbC [Pseudomonas aeruginosa PAO1]	-0.213895	0.360768	0.619472
9951557	UPF0178 protein PA5247	PA5247						PA5247	conserved hypothetical protein [Pseudomonas aeruginosa PAO1]	-0.21395	0.655045	0.820336
9951007	Transcription termination/antitermination protein NusA	nusA	PA4745					PA4745	N utilization substance protein A [Pseudomonas aeruginosa PAO1]	-0.21411	0.308385	0.574209
9946224	Probable zinc protease	PA0372						PA0372	probable zinc protease [Pseudomonas aeruginosa PAO1]	-0.214555	0.29892	0.565052
9946874	Holliday junction ATP-dependent DNA helicase RuvB (EC 3.6.4.12)	ruvB	PA0967					PA0967	Holliday junction DNA helicase RuvB [Pseudomonas aeruginosa PAO1]	-0.214635	0.656631	0.820702
9947776	Glutamine--tRNA ligase (EC 6.1.1.18) (Glutaminyl-tRNA synthetase) (GlnRS)	glnS	PA1794					PA1794	glutaminyl-tRNA synthetase [Pseudomonas aeruginosa PAO1]	-0.214774	0.151996	0.431404
9951252	3',5'-cyclic adenosine monophosphate phosphodiesterase CpdA (3',5'-cyclic AMP phosphodiesterase) (cAMP phosphodiesterase) (EC 3.1.4.53)	cpdA	PA4969					PA4969	Cyclic AMP (cAMP) Phosphodiesterase, CpdA [Pseudomonas aeruginosa PAO1]	-0.215674	0.213425	0.492087
9948126	UPF0271 protein PA2112	PA2112						PA2112	conserved hypothetical protein [Pseudomonas aeruginosa PAO1]	-0.215973	0.25141	0.523438
9948030	Glutathione reductase (GR) (GRase) (EC 1.8.1.7)	gor	PA2025					PA2025	glutathione reductase [Pseudomonas aeruginosa PAO1]	-0.216305	0.687149	0.8406
9951347	Uncharacterized protein	PA5055						PA5055	hypothetical protein PA5055 [Pseudomonas aeruginosa PAO1]	-0.216617	0.310608	0.576076
9949197	NAD kinase (EC 2.7.1.23) (ATP-dependent NAD kinase)	nadK	PA3088					PA3088	conserved hypothetical protein [Pseudomonas aeruginosa PAO1]	-0.216819	0.178122	0.458317
9946879	Protein TolB	tolB	PA0972					PA0972	TolB protein [Pseudomonas aeruginosa PAO1]	-0.217978	0.246297	0.518626
9946944	Acyl-homoserine lactone acylase QuiP (AHL acylase QuiP) (Acyl-HSL acylase QuiP) (EC 3.5.1.97) (Quorum signal utilization and inactivation protein) [Cleaved into: Acyl-homoserine lactone acylase QuiP subunit alpha (Acyl-HSL acylase QuiP subunit alpha); Acyl-homoserine lactone acylase QuiP subunit beta (Acyl-HSL acylase QuiP subunit beta)]	quiP	PA1032					PA1032	QuiP [Pseudomonas aeruginosa PAO1]	-0.219257	0.623281	0.801008
9947104	Two-component response regulator PhoP	phoP	PA1179					PA1179	two-component response regulator PhoP [Pseudomonas aeruginosa PAO1]	-0.219357	0.764425	0.890383
9946460	Uncharacterized protein	PA0588						PA0588	conserved hypothetical protein [Pseudomonas aeruginosa PAO1]	-0.220112	0.139514	0.414822
9946270	Probable chemotaxis protein	chpC	PA0415					PA0415	probable chemotaxis protein [Pseudomonas aeruginosa PAO1]	-0.220164	0.191212	0.469285
9949366	Probable septum site-determining protein MinC	minC	PA3243					PA3243	cell division inhibitor MinC [Pseudomonas aeruginosa PAO1]	-0.220673	0.610288	0.790395
9951688	Phosphate transport system permease protein PstA	pstA	PA5367					PA5367	membrane protein component of ABC phosphate transporter [Pseudomonas aeruginosa PAO1]	-0.220691	0.460527	0.697986
9948677	Serine--tRNA ligase (EC 6.1.1.11) (Seryl-tRNA synthetase) (SerRS) (Seryl-tRNA(Ser/Sec) synthetase)	serS	PA2612					PA2612	seryl-tRNA synthetase [Pseudomonas aeruginosa PAO1]	-0.221746	0.143518	0.419883
9949817	30S ribosomal protein S2	rpsB	PA3656					PA3656	30S ribosomal protein S2 [Pseudomonas aeruginosa PAO1]	-0.222846	0.310561	0.576076
9949905	Thiol:disulfide interchange protein DsbC	dsbC	PA3737					PA3737	thiol:disulfide interchange protein DsbC [Pseudomonas aeruginosa PAO1]	-0.222922	0.278162	0.551621
9947653	Chorismate synthase (CS) (EC 4.2.3.5) (5-enolpyruvylshikimate-3-phosphate phospholyase)	aroC	PA1681					PA1681	chorismate synthase [Pseudomonas aeruginosa PAO1]	-0.223002	0.670376	0.829592
9950545	Uncharacterized protein	PA4321						PA4321	hypothetical protein PA4321 [Pseudomonas aeruginosa PAO1]	-0.223534	0.19627	0.474406
9950718	Cell shape-determining protein MreC (Cell shape protein MreC)	mreC	PA4480					PA4480	rod shape-determining protein MreC [Pseudomonas aeruginosa PAO1]	-0.22391	0.174524	0.453409
9950774	Uncharacterized protein	PA4531						PA4531	hypothetical protein PA4531 [Pseudomonas aeruginosa PAO1]	-0.223959	0.873865	0.936539
9950985	Two-component sensor CbrA	cbrA	PA4725					PA4725	two-component sensor CbrA [Pseudomonas aeruginosa PAO1]	-0.224231	0.868748	0.935728
9947786	Lon protease (EC 3.4.21.53) (ATP-dependent protease La)	lon	PA1803					PA1803	Lon protease [Pseudomonas aeruginosa PAO1]	-0.224239	0.184009	0.462895
9946536	Uncharacterized protein	PA0659						PA0659	hypothetical protein PA0659 [Pseudomonas aeruginosa PAO1]	-0.225242	0.162877	0.438487
9946587	Probable amidase	PA0704						PA0704	probable amidase [Pseudomonas aeruginosa PAO1]	-0.226045	0.240151	0.515279
28416300	Nonspecific ribonucleoside hydrolase	nuh	PA0143					PA0143	nonspecific ribonucleoside hydrolase [Pseudomonas aeruginosa PAO1]	-0.226108	0.214993	0.493774
9951221	Protein HflC	hflC	PA4941					PA4941	protease subunit HflC [Pseudomonas aeruginosa PAO1]	-0.226395	0.209531	0.490156
9947544	Succinate dehydrogenase (C subunit)	sdhC	PA1581					PA1581	succinate dehydrogenase (C subunit) [Pseudomonas aeruginosa PAO1]	-0.226559	0.12529	0.400285
9949012	Probable short-chain dehydrogenase	PA2918						PA2918	probable short-chain dehydrogenase [Pseudomonas aeruginosa PAO1]	-0.227368	0.637271	0.809358
9951226	DNA mismatch repair protein MutL	mutL	PA4946					PA4946	DNA mismatch repair protein MutL [Pseudomonas aeruginosa PAO1]	-0.228039	0.45539	0.694557
9948930	Phospho-2-dehydro-3-deoxyheptonate aldolase (EC 2.5.1.54)	PA2843						PA2843	probable aldolase [Pseudomonas aeruginosa PAO1]	-0.229767	0.852454	0.929782
9951408	Lactoylglutathione lyase (EC 4.4.1.5) (Aldoketomutase) (Glyoxalase I) (Glx I) (Ketone-aldehyde mutase) (Methylglyoxalase) (S-D-lactoylglutathione methylglyoxal lyase)	gloA	PA5111					PA5111	lactoylglutathione lyase [Pseudomonas aeruginosa PAO1]	-0.2303	0.229	0.507195
9946344	Malate synthase G (EC 2.3.3.9)	glcB	PA0482					PA0482	malate synthase G [Pseudomonas aeruginosa PAO1]	-0.230543	0.126677	0.40242
9948643	Uncharacterized protein	PA2581						PA2581	hypothetical protein PA2581 [Pseudomonas aeruginosa PAO1]	-0.231195	0.234407	0.511419
9946160	L-cysteine transporter of ABC system FliY	PA0314						PA0314	L-cysteine transporter of ABC system FliY [Pseudomonas aeruginosa PAO1]	-0.231386	0.156523	0.433414
9950706	Fumarate hydratase class II 1 (Fumarase C 1) (EC 4.2.1.2)	fumC1	PA4470					PA4470	fumarate hydratase [Pseudomonas aeruginosa PAO1]	-0.232033	0.15318	0.431705
9948817	Phenylalanine--tRNA ligase beta subunit (EC 6.1.1.20) (Phenylalanyl-tRNA synthetase beta subunit) (PheRS)	pheT	PA2739					PA2739	phenylalanyl-tRNA synthetase, beta subunit [Pseudomonas aeruginosa PAO1]	-0.232144	0.194698	0.473335
9948054	Probable transcriptional regulator	PA2047						PA2047	probable transcriptional regulator [Pseudomonas aeruginosa PAO1]	-0.232941	0.155424	0.433414
9945911	Uncharacterized protein	PA0086						PA0086	hypothetical protein PA0086 [Pseudomonas aeruginosa PAO1]	-0.233159	0.676098	0.833125
9951004	tRNA pseudouridine synthase B (EC 5.4.99.25) (Osmoprotectant regulator of PLC) (ORP protein) (tRNA pseudouridine(55) synthase) (Psi55 synthase) (tRNA pseudouridylate synthase) (tRNA-uridine isomerase)	truB	orp	PA4742				PA4742	tRNA pseudouridine 55 synthase [Pseudomonas aeruginosa PAO1]	-0.233708	0.0847027	0.336762
9949480	Uncharacterized protein	PA3347						PA3347	hypothetical protein PA3347 [Pseudomonas aeruginosa PAO1]	-0.234046	0.34578	0.607843
9946668	Lon protease (EC 3.4.21.53) (ATP-dependent protease La)	lon	PA0779					PA0779	probable ATP-dependent protease [Pseudomonas aeruginosa PAO1]	-0.235024	0.233666	0.511294
9950154	Probable transcriptional regulator	PA3965						PA3965	probable transcriptional regulator [Pseudomonas aeruginosa PAO1]	-0.235364	0.827187	0.920352
9951219	ATP phosphoribosyltransferase regulatory subunit	hisZ	PA4939					PA4939	conserved hypothetical protein [Pseudomonas aeruginosa PAO1]	-0.235545	0.355864	0.614865
9945859	Uncharacterized protein	PA0038						PA0038	hypothetical protein PA0038 [Pseudomonas aeruginosa PAO1]	-0.235657	0.873313	0.936506
9950729	Uncharacterized protein	PA4491						PA4491	conserved hypothetical protein [Pseudomonas aeruginosa PAO1]	-0.23598	0.30703	0.573042
9950253	Riboflavin biosynthesis protein RibD	ribD	PA4056					PA4056	riboflavin-specific deaminase/reductase [Pseudomonas aeruginosa PAO1]	-0.23731	0.415501	0.662424
9947553	Succinyl-CoA ligase [ADP-forming] subunit alpha (EC 6.2.1.5) (Succinyl-CoA synthetase subunit alpha) (SCS-alpha)	sucD	PA1589					PA1589	succinyl-CoA synthetase alpha chain [Pseudomonas aeruginosa PAO1]	-0.238325	0.250727	0.522939
9950340	Probable transcriptional regulator	PA4135						PA4135	probable transcriptional regulator [Pseudomonas aeruginosa PAO1]	-0.239377	0.975345	0.990208
9951440	Imidazole glycerol phosphate synthase subunit hisF1 (EC 4.1.3.-) (IGP synthase cyclase subunit) (IGP synthase subunit hisF1) (ImGP synthase subunit hisF1) (IGPS subunit hisF1)	hisF1	PA5140					PA5140	imidazoleglycerol-phosphate synthase, cyclase subunit [Pseudomonas aeruginosa PAO1]	-0.239849	0.286796	0.556436
9947752	Putative 4-hydroxy-4-methyl-2-oxoglutarate aldolase (HMG aldolase) (EC 4.1.3.17) (Oxaloacetate decarboxylase) (OAA decarboxylase) (EC 4.1.1.3) (Regulator of ribonuclease activity homolog) (RraA-like protein)	PA1772						PA1772	probable methyltransferase [Pseudomonas aeruginosa PAO1]	-0.240114	0.930211	0.965375
9950395	Probable transcriptional regulator	PA4185						PA4185	probable transcriptional regulator [Pseudomonas aeruginosa PAO1]	-0.240251	0.411815	0.659837
9946877	Protein TolR	tolR	PA0970					PA0970	TolR protein [Pseudomonas aeruginosa PAO1]	-0.240976	0.293639	0.560454
9950688	Uncharacterized protein	PA4453						PA4453	conserved hypothetical protein [Pseudomonas aeruginosa PAO1]	-0.242274	0.406622	0.65605
9947580	Glycerol-3-phosphate dehydrogenase [NAD(P)+] (EC 1.1.1.94) (NAD(P)H-dependent glycerol-3-phosphate dehydrogenase)	gpsA	PA1614					PA1614	glycerol-3-phosphate dehydrogenase, biosynthetic [Pseudomonas aeruginosa PAO1]	-0.243202	0.227157	0.504532
301015675	Uncharacterized protein	PA0856						PA0856	Chain A, Crystal Structure Of The Hypothetical Protein Pa0856 From Pseudomonas Aeruginosa	-0.243732	0.869848	0.935765
9947650	50S ribosomal protein L3 glutamine methyltransferase (L3 MTase) (EC 2.1.1.298) (N5-glutamine methyltransferase PrmB)	prmB	PA1678					PA1678	probable DNA methylase [Pseudomonas aeruginosa PAO1]	-0.243736	0.11527	0.382775
9951051	Probable acyl-CoA thiolase	PA4785						PA4785	probable acyl-CoA thiolase [Pseudomonas aeruginosa PAO1]	-0.243842	0.245824	0.518626
9948197	Probable sensor/response regulator hybrid	PA2177						PA2177	probable sensor/response regulator hybrid [Pseudomonas aeruginosa PAO1]	-0.244506	0.240622	0.515279
9950898	Probable purine/pyrimidine phosphoribosyl transferase	PA4645						PA4645	probable purine/pyrimidine phosphoribosyl transferase [Pseudomonas aeruginosa PAO1]	-0.244541	0.936947	0.967412
9949264	LPS biosynthesis protein WbpG	wbpG	PA3150					PA3150	LPS biosynthesis protein WbpG [Pseudomonas aeruginosa PAO1]	-0.245955	0.461278	0.698575
9947242	Uncharacterized protein	PA1305						PA1305	hypothetical protein PA1305 [Pseudomonas aeruginosa PAO1]	-0.245988	0.930883	0.965561
9948796	Uncharacterized protein	PA2720						PA2720	hypothetical protein PA2720 [Pseudomonas aeruginosa PAO1]	-0.246146	0.110646	0.377559
9951306	Ribosomal RNA large subunit methyltransferase J (EC 2.1.1.266) (23S rRNA (adenine(2030)-N6)-methyltransferase) (23S rRNA m6A2030 methyltransferase)	rlmJ	PA5019					PA5019	conserved hypothetical protein [Pseudomonas aeruginosa PAO1]	-0.247176	0.281585	0.553097
9946655	Elongation factor 4 (EF-4) (EC 3.6.5.n1) (Ribosomal back-translocase LepA)	lepA	le	PA0767				PA0767	GTP-binding protein LepA [Pseudomonas aeruginosa PAO1]	-0.247208	0.920994	0.95876
9947275	Probable two-component response regulator	PA1335						PA1335	probable two-component response regulator [Pseudomonas aeruginosa PAO1]	-0.24797	0.144848	0.420235
9950008	Uncharacterized protein	PA3833						PA3833	hypothetical protein PA3833 [Pseudomonas aeruginosa PAO1]	-0.248693	0.412893	0.660909
9950131	Acetyltransferase PA3944 (EC 2.3.1.-) (GCN5-related N-acetyltransferase) (GNAT)	PA3944						PA3944	conserved hypothetical protein [Pseudomonas aeruginosa PAO1]	-0.25012	0.254247	0.526234
9950710	UPF0307 protein PA4473	PA4473						PA4473	hypothetical protein PA4473 [Pseudomonas aeruginosa PAO1]	-0.250216	0.299728	0.565598
9950823	Probable ATP-dependent protease	PA4576						PA4576	probable ATP-dependent protease [Pseudomonas aeruginosa PAO1]	-0.250504	0.352122	0.611744
9946961	Probable esterase	PA1047						PA1047	probable esterase [Pseudomonas aeruginosa PAO1]	-0.2509	0.499756	0.723436
9950724	Uncharacterized protein	PA4486						PA4486	conserved hypothetical protein [Pseudomonas aeruginosa PAO1]	-0.251551	0.496805	0.721846
9945820	DNA polymerase III subunit beta (EC 2.7.7.7)	dnaN	PA0002					PA0002	DNA polymerase III, beta chain [Pseudomonas aeruginosa PAO1]	-0.251678	0.515825	0.732124
9949818	Methionine aminopeptidase (MAP) (MetAP) (EC 3.4.11.18) (Peptidase M)	map	PA3657					PA3657	methionine aminopeptidase [Pseudomonas aeruginosa PAO1]	-0.252402	0.185081	0.464373
9949916	Uncharacterized protein	PA3748						PA3748	conserved hypothetical protein [Pseudomonas aeruginosa PAO1]	-0.252903	0.197772	0.475911
9945999	Probable transcriptional regulator	PA0167						PA0167	probable transcriptional regulator [Pseudomonas aeruginosa PAO1]	-0.253096	0.302777	0.568271
9946921	Uncharacterized protein	PA1011						PA1011	hypothetical protein PA1011 [Pseudomonas aeruginosa PAO1]	-0.253395	0.464879	0.701518
9949486	Uncharacterized protein	PA3353						PA3353	hypothetical protein PA3353 [Pseudomonas aeruginosa PAO1]	-0.253442	0.64921	0.815726
9946990	Leucine-, isoleucine-, valine-, threonine-, and alanine-binding protein (LIVAT-BP) (Leu/Ile/Val/Thr/Ala-binding protein)	braC	PA1074					PA1074	branched-chain amino acid transport protein BraC [Pseudomonas aeruginosa PAO1]	-0.253467	0.25268	0.524233
15596620	Biofilm dispersion protein BdlA (Chemotaxis regulator BdlA)	bdlA	PA1423					PA1423	BdlA [Pseudomonas aeruginosa PAO1]	-0.254186	0.559341	0.761181
9950965	Probable permease of ABC transporter	PA4707						PA4707	probable permease of ABC transporter [Pseudomonas aeruginosa PAO1]	-0.25421	0.910254	0.952197
9951303	Dihydrolipoyllysine-residue acetyltransferase component of pyruvate dehydrogenase complex (EC 2.3.1.12) (Dihydrolipoamide acetyltransferase component of pyruvate dehydrogenase complex) (E2)	aceF	aceB	PA5016				PA5016	dihydrolipoamide acetyltransferase [Pseudomonas aeruginosa PAO1]	-0.255076	0.145094	0.420235
9949064	Acyl carrier protein 1 (ACP 1)	acpP1	acpP	PA2966				PA2966	acyl carrier protein [Pseudomonas aeruginosa PAO1]	-0.255463	0.27392	0.549935
9950786	Chaperone protein ClpB	clpB	PA4542					PA4542	ClpB protein [Pseudomonas aeruginosa PAO1]	-0.256238	0.194417	0.473215
9949367	Site-determining protein	minD	PA3244					PA3244	cell division inhibitor MinD [Pseudomonas aeruginosa PAO1]	-0.256837	0.152947	0.431705
9945883	Uncharacterized protein	PA0060						PA0060	conserved hypothetical protein [Pseudomonas aeruginosa PAO1]	-0.256942	0.65507	0.820336
9950658	Phosphoheptose isomerase (EC 5.3.1.28) (Sedoheptulose 7-phosphate isomerase)	gmhA	PA4425					PA4425	sedoheptulose 7-phosphate isomerase GmhA [Pseudomonas aeruginosa PAO1]	-0.257069	0.674	0.831842
9946544	Anhydro-N-acetylmuramic acid kinase (EC 2.7.1.170) (AnhMurNAc kinase)	anmK	PA0666					PA0666	conserved hypothetical protein [Pseudomonas aeruginosa PAO1]	-0.257978	0.193506	0.471971
9946662	Pyridoxine 5'-phosphate synthase (PNP synthase) (EC 2.6.99.2)	pdxJ	PA0773					PA0773	pyridoxal phosphate biosynthetic protein PdxJ [Pseudomonas aeruginosa PAO1]	-0.258237	0.178347	0.458317
9950590	Uncharacterized protein	PA4362						PA4362	hypothetical protein PA4362 [Pseudomonas aeruginosa PAO1]	-0.258573	0.899402	0.94739
9947726	Probable enoyl-CoA hydratase/isomerase	PA1748						PA1748	probable enoyl-CoA hydratase/isomerase [Pseudomonas aeruginosa PAO1]	-0.259002	0.221391	0.499946
9950667	Probable oxidoreductase	PA4434						PA4434	probable oxidoreductase [Pseudomonas aeruginosa PAO1]	-0.259798	0.171728	0.451001
9946350	Probable molybdenum transport regulator	PA0487						PA0487	probable molybdenum transport regulator [Pseudomonas aeruginosa PAO1]	-0.261771	0.957379	0.981064
9949794	Enolase (EC 4.2.1.11) (2-phospho-D-glycerate hydro-lyase) (2-phosphoglycerate dehydratase)	eno	PA3635					PA3635	enolase [Pseudomonas aeruginosa PAO1]	-0.262829	0.459359	0.697458
9945891	Oligopeptidase A	prlC	PA0067					PA0067	oligopeptidase A [Pseudomonas aeruginosa PAO1]	-0.262967	0.132173	0.406482
9950959	Uncharacterized protein	PA4701						PA4701	conserved hypothetical protein [Pseudomonas aeruginosa PAO1]	-0.26331	0.0949997	0.351721
9951361	Sec-independent protein translocase protein TatA	tatA	PA5068					PA5068	translocation protein TatA [Pseudomonas aeruginosa PAO1]	-0.263551	0.529409	0.741361
9946645	Uncharacterized protein	PA0758						PA0758	hypothetical protein PA0758 [Pseudomonas aeruginosa PAO1]	-0.263668	0.717371	0.859317
9949866	Probable two-component response regulator	wspR	PA3702					PA3702	probable two-component response regulator [Pseudomonas aeruginosa PAO1]	-0.264089	0.130369	0.406482
9946185	Phosphoenolpyruvate-protein phosphotransferase PtsP	ptsP	PA0337					PA0337	phosphoenolpyruvate-protein phosphotransferase PtsP [Pseudomonas aeruginosa PAO1]	-0.264748	0.0929608	0.349661
9949226	Motility protein FimV	fimV	PA3115					PA3115	Motility protein FimV [Pseudomonas aeruginosa PAO1]	-0.264994	0.106028	0.369158
9950660	Stringent starvation protein B	sspB	PA4427					PA4427	stringent starvation protein B [Pseudomonas aeruginosa PAO1]	-0.265426	0.51347	0.729863
9949222	Folylpolyglutamate synthetase	folC	PA3111					PA3111	folylpolyglutamate synthetase [Pseudomonas aeruginosa PAO1]	-0.265991	0.370281	0.628753
9950597	Uncharacterized protein	PA4369						PA4369	hypothetical protein PA4369 [Pseudomonas aeruginosa PAO1]	-0.265993	0.690773	0.843285
9947537	UPF0345 protein PA1574	PA1574						PA1574	conserved hypothetical protein [Pseudomonas aeruginosa PAO1]	-0.266318	0.327032	0.59137
9948674	Uncharacterized protein	PA2609						PA2609	hypothetical protein PA2609 [Pseudomonas aeruginosa PAO1]	-0.266938	0.173103	0.452599
9950644	UDP-N-acetylglucosamine--N-acetylmuramyl-(pentapeptide) pyrophosphoryl-undecaprenol N-acetylglucosamine transferase (EC 2.4.1.227) (Undecaprenyl-PP-MurNAc-pentapeptide-UDPGlcNAc GlcNAc transferase)	murG	PA4412					PA4412	UDP-N-acetylglucosamine--N-acetylmuramyl-(pentapeptide) pyrophosphoryl-undecaprenol N-acetylglucosamine transferase [Pseudomonas aeruginosa PAO1]	-0.267797	0.982757	0.993699
9945987	Probable Resistance-Nodulation-Cell Division (RND) efflux membrane fusion protein	PA0156						PA0156	probable Resistance-Nodulation-Cell Division (RND) efflux membrane fusion protein precursor [Pseudomonas aeruginosa PAO1]	-0.268179	0.10739	0.371678
9947408	Chemotaxis protein CheY	cheY	PA1456					PA1456	two-component response regulator CheY [Pseudomonas aeruginosa PAO1]	-0.268215	0.8072	0.910124
9948337	AmbB	ambB	PA2305					PA2305	AmbB [Pseudomonas aeruginosa PAO1]	-0.268874	0.15438	0.433414
9947449	Uncharacterized protein	PA1494						PA1494	conserved hypothetical protein [Pseudomonas aeruginosa PAO1]	-0.269863	0.745729	0.877723
9950811	Glutamate 5-kinase (EC 2.7.2.11) (Gamma-glutamyl kinase) (GK)	proB	PA4565					PA4565	glutamate 5-kinase [Pseudomonas aeruginosa PAO1]	-0.27022	0.333473	0.597368
9951753	N5-carboxyaminoimidazole ribonucleotide synthase (N5-CAIR synthase) (EC 6.3.4.18) (5-(carboxyamino)imidazole ribonucleotide synthetase)	purK	PA5425					PA5425	phosphoribosylaminoimidazole carboxylase [Pseudomonas aeruginosa PAO1]	-0.270385	0.286956	0.556436
9946733	Glutathione peroxidase	PA0838						PA0838	probable glutathione peroxidase [Pseudomonas aeruginosa PAO1]	-0.270779	0.218427	0.496437
9946528	Indole-3-glycerol phosphate synthase (IGPS) (EC 4.1.1.48)	trpC	PA0651					PA0651	indole-3-glycerol-phosphate synthase [Pseudomonas aeruginosa PAO1]	-0.271163	0.0774286	0.324129
9951109	Biosynthetic arginine decarboxylase (ADC) (EC 4.1.1.19)	speA	PA4839					PA4839	biosynthetic arginine decarboxylase [Pseudomonas aeruginosa PAO1]	-0.272078	0.0910281	0.348029
9946184	RNA pyrophosphohydrolase (EC 3.6.1.-) ((Di)nucleoside polyphosphate hydrolase)	rppH	nudH	PA0336				PA0336	Nudix hydrolase YgdP [Pseudomonas aeruginosa PAO1]	-0.272869	0.109747	0.376336
9951029	Outer membrane protein assembly factor BamE	bamE	omlA	oprX	PA4765			PA4765	Outer membrane lipoprotein OmlA precursor [Pseudomonas aeruginosa PAO1]	-0.273119	0.506266	0.725665
9948724	Probable chemotaxis transducer	PA2654						PA2654	probable chemotaxis transducer [Pseudomonas aeruginosa PAO1]	-0.273307	0.242595	0.516123
9949116	Fatty acid oxidation complex subunit alpha [Includes: Enoyl-CoA hydratase/Delta(3)-cis-Delta(2)-trans-enoyl-CoA isomerase/3-hydroxybutyryl-CoA epimerase (EC 4.2.1.17) (EC 5.1.2.3) (EC 5.3.3.8); 3-hydroxyacyl-CoA dehydrogenase (EC 1.1.1.35)]	fadB	PA3014					PA3014	fatty-acid oxidation complex alpha-subunit [Pseudomonas aeruginosa PAO1]	-0.274593	0.336212	0.600451
9947828	Uncharacterized protein	PA1841						PA1841	hypothetical protein PA1841 [Pseudomonas aeruginosa PAO1]	-0.275229	0.249051	0.521247
9949808	Outer membrane protein assembly factor BamA	opr86	bamA	PA3648				PA3648	outer membrane protein Opr86 [Pseudomonas aeruginosa PAO1]	-0.275397	0.100915	0.363795
9950640	Cell division protein FtsA	ftsA	PA4408					PA4408	cell division protein FtsA [Pseudomonas aeruginosa PAO1]	-0.27541	0.155431	0.433414
9951386	N-formylglutamate amidohydrolase	hutG	PA5091					PA5091	N-formylglutamate amidohydrolase [Pseudomonas aeruginosa PAO1]	-0.275674	0.223921	0.502504
9946881	Uncharacterized protein	PA0974						PA0974	conserved hypothetical protein [Pseudomonas aeruginosa PAO1]	-0.275691	0.142859	0.418687
9951237	Sulfurtransferase	rhdA	PA4956					PA4956	thiosulfate:cyanide sulfurtransferase [Pseudomonas aeruginosa PAO1]	-0.276218	0.089397	0.345757
9947881	Uncharacterized protein	PA1889						PA1889	hypothetical protein PA1889 [Pseudomonas aeruginosa PAO1]	-0.276254	0.913487	0.953889
15597816	ATP-binding protease component ClpA	clpA	PA2620					PA2620	ATP-binding protease component ClpA [Pseudomonas aeruginosa PAO1]	-0.276773	0.0774035	0.324129
9947558	Uncharacterized protein	PA1594						PA1594	hypothetical protein PA1594 [Pseudomonas aeruginosa PAO1]	-0.277437	0.317973	0.585139
9948452	Probable ATP-binding component of ABC transporter	PA2408						PA2408	probable ATP-binding component of ABC transporter [Pseudomonas aeruginosa PAO1]	-0.277522	0.14943	0.427641
9949332	Probable ATP-binding component of ABC transporter	PA3212						PA3212	probable ATP-binding component of ABC transporter [Pseudomonas aeruginosa PAO1]	-0.277922	0.954684	0.980004
9948038	Uncharacterized protein	PA2033						PA2033	hypothetical protein PA2033 [Pseudomonas aeruginosa PAO1]	-0.278076	0.288134	0.557609
9951858	Probable short-chain dehydrogenase	PA5521						PA5521	probable short-chain dehydrogenase [Pseudomonas aeruginosa PAO1]	-0.278136	0.149384	0.427641
9950103	Uncharacterized protein	PA3919						PA3919	conserved hypothetical protein [Pseudomonas aeruginosa PAO1]	-0.278473	0.184633	0.463742
9948726	Probable two-component sensor	PA2656						PA2656	probable two-component sensor [Pseudomonas aeruginosa PAO1]	-0.278944	0.558589	0.761181
9950805	Isoleucine--tRNA ligase (EC 6.1.1.5) (Isoleucyl-tRNA synthetase) (IleRS)	ileS	PA4560					PA4560	isoleucyl-tRNA synthetase [Pseudomonas aeruginosa PAO1]	-0.279234	0.19268	0.471971
9950712	Uncharacterized protein	PA4475						PA4475	conserved hypothetical protein [Pseudomonas aeruginosa PAO1]	-0.279257	0.202195	0.480987
9950899	Uracil phosphoribosyltransferase (EC 2.4.2.9) (UMP pyrophosphorylase) (UPRTase)	upp	PA4646					PA4646	uracil phosphoribosyltransferase [Pseudomonas aeruginosa PAO1]	-0.279939	0.167917	0.444952
9951657	Guanosine-3',5'-bis(Diphosphate) 3'-pyrophosphohydrolase	spoT	PA5338					PA5338	guanosine-3',5'-bis(diphosphate) 3'-pyrophosphohydrolase [Pseudomonas aeruginosa PAO1]	-0.279943	0.162717	0.438487
9950029	Uncharacterized protein	PA3852						PA3852	hypothetical protein PA3852 [Pseudomonas aeruginosa PAO1]	-0.280371	0.3213	0.588055
9950276	Probable nonribosomal peptide synthetase	PA4078						PA4078	probable nonribosomal peptide synthetase [Pseudomonas aeruginosa PAO1]	-0.280936	0.354854	0.614728
9951024	Chaperone protein DnaK (HSP70) (Heat shock 70 kDa protein) (Heat shock protein 70)	dnaK	PA4761					PA4761	DnaK protein [Pseudomonas aeruginosa PAO1]	-0.281684	0.120828	0.390134
9947435	Thiol:disulfide interchange protein DsbE (Cytochrome c biogenesis protein CcmG)	dsbE	ccmG	PA1481				PA1481	cytochrome C biogenesis protein CcmG [Pseudomonas aeruginosa PAO1]	-0.282596	0.581792	0.772917
9949677	Ribonuclease T (EC 3.1.13.-) (Exoribonuclease T) (RNase T)	rnt	PA3528					PA3528	ribonuclease T [Pseudomonas aeruginosa PAO1]	-0.282681	0.457509	0.695991
9950363	Probable TonB-dependent receptor	PA4156						PA4156	probable TonB-dependent receptor [Pseudomonas aeruginosa PAO1]	-0.282989	0.244247	0.517655
9949894	Uncharacterized protein	PA3728						PA3728	hypothetical protein PA3728 [Pseudomonas aeruginosa PAO1]	-0.284149	0.120321	0.390134
9948023	Resistance-Nodulation-Cell Division (RND) multidrug efflux membrane fusion protein	PA2019						PA2019	Resistance-Nodulation-Cell Division (RND) multidrug efflux membrane fusion protein precursor [Pseudomonas aeruginosa PAO1]	-0.284866	0.113926	0.382371
9951441	1-(5-phosphoribosyl)-5-[(5-phosphoribosylamino)methylideneamino] imidazole-4-carboxamide isomerase (EC 5.3.1.16) (Phosphoribosylformimino-5-aminoimidazole carboxamide ribotide isomerase)	hisA	PA5141					PA5141	phosphoribosylformimino-5-aminoimidazole carboxamide [Pseudomonas aeruginosa PAO1]	-0.284943	0.235468	0.511443
9951122	Uncharacterized protein	PA4851						PA4851	hypothetical protein PA4851 [Pseudomonas aeruginosa PAO1]	-0.285594	0.557348	0.761181
9947127	Uncharacterized protein	PA1200						PA1200	conserved hypothetical protein [Pseudomonas aeruginosa PAO1]	-0.28593	0.624915	0.801033
9951591	Diaminopimelate epimerase (DAP epimerase) (EC 5.1.1.7)	dapF	PA5278					PA5278	diaminopimelate epimerase [Pseudomonas aeruginosa PAO1]	-0.285952	0.186573	0.465231
9948451	Probable adhesion protein	PA2407						PA2407	probable adhesion protein [Pseudomonas aeruginosa PAO1]	-0.286726	0.116136	0.384456
9951430	2,3-bisphosphoglycerate-independent phosphoglycerate mutase (BPG-independent PGAM) (Phosphoglyceromutase) (iPGM) (EC 5.4.2.12)	gpmI	pgm	PA5131				PA5131	phosphoglycerate mutase [Pseudomonas aeruginosa PAO1]	-0.287553	0.298693	0.565052
9950844	Probable ATP-binding component of ABC transporter	PA4595						PA4595	probable ATP-binding component of ABC transporter [Pseudomonas aeruginosa PAO1]	-0.288059	0.102652	0.367917
9950184	Uncharacterized protein	PA3992						PA3992	hypothetical protein PA3992 [Pseudomonas aeruginosa PAO1]	-0.288774	0.168983	0.446432
9951371	Glucans biosynthesis protein G	opgG	PA5078					PA5078	conserved hypothetical protein [Pseudomonas aeruginosa PAO1]	-0.288834	0.112358	0.380552
9951648	Uncharacterized protein	PA5330						PA5330	hypothetical protein PA5330 [Pseudomonas aeruginosa PAO1]	-0.289323	0.159383	0.4356
9948915	Protease HtpX (EC 3.4.24.-) (Heat shock protein HtpX)	htpX	PA2830					PA2830	heat shock protein HtpX [Pseudomonas aeruginosa PAO1]	-0.28938	0.147997	0.42643
9950893	Uncharacterized protein	PA4639						PA4639	hypothetical protein PA4639 [Pseudomonas aeruginosa PAO1]	-0.28954	0.22494	0.502504
9950851	Motility regulator	morA	PA4601					PA4601	motility regulator [Pseudomonas aeruginosa PAO1]	-0.293471	0.173958	0.453393
9949046	Probable lipase	PA2949						PA2949	probable lipase [Pseudomonas aeruginosa PAO1]	-0.294008	0.203375	0.481613
9946424	Fructose-bisphosphate aldolase (FBP aldolase) (FBPA) (EC 4.1.2.13) (Fructose-1,6-bisphosphate aldolase)	fba	fda	PA0555				PA0555	fructose-1,6-bisphosphate aldolase [Pseudomonas aeruginosa PAO1]	-0.294066	0.138409	0.413253
15596750	Cytochrome c oxidase, cbb3-type, CcoO subunit	ccoO1	PA1553					PA1553	cbb3-type cytochrome C oxidase subunit II [Pseudomonas aeruginosa PAO1]	-0.294107	0.0916698	0.348522
9949148	Deoxyguanosinetriphosphate triphosphohydrolase-like protein	dgt2	PA3043					PA3043	conserved hypothetical protein [Pseudomonas aeruginosa PAO1]	-0.294331	0.413353	0.660986
9946469	Uncharacterized protein	PA0596						PA0596	hypothetical protein PA0596 [Pseudomonas aeruginosa PAO1]	-0.295012	0.220735	0.499669
9950491	50S ribosomal protein L10	rplJ	PA4272					PA4272	50S ribosomal protein L10 [Pseudomonas aeruginosa PAO1]	-0.29556	0.449282	0.68925
9951756	Probable transcriptional regulator	PA5428						PA5428	probable transcriptional regulator [Pseudomonas aeruginosa PAO1]	-0.295952	0.066512	0.301537
9946799	N-succinylglutamate 5-semialdehyde dehydrogenase (EC 1.2.1.71) (Succinylglutamic semialdehyde dehydrogenase) (SGSD)	astD	aruD	PA0898				PA0898	succinylglutamate 5-semialdehyde dehydrogenase [Pseudomonas aeruginosa PAO1]	-0.296336	0.218414	0.496437
9947010	Uncharacterized protein	PA1093						PA1093	hypothetical protein PA1093 [Pseudomonas aeruginosa PAO1]	-0.297097	0.350987	0.611731
9948658	Uncharacterized protein	PA2594						PA2594	conserved hypothetical protein [Pseudomonas aeruginosa PAO1]	-0.29753	0.172403	0.451769
9945991	Probable transcriptional regulator	PA0159						PA0159	probable transcriptional regulator [Pseudomonas aeruginosa PAO1]	-0.297576	0.187982	0.467676
9946806	Aspartokinase (EC 2.7.2.4) (Aspartate kinase)	lysC	PA0904					PA0904	aspartate kinase alpha and beta chain [Pseudomonas aeruginosa PAO1]	-0.298178	0.835578	0.924028
9948457	L-2,4-diaminobutyrate:2-ketoglutarate 4-aminotransferase, PvdH	pvdH	PA2413					PA2413	L-2,4-diaminobutyrate:2-ketoglutarate 4-aminotransferase, PvdH [Pseudomonas aeruginosa PAO1]	-0.299424	0.166963	0.44292
9951290	Probable glycosyl transferase	PA5004						PA5004	probable glycosyl transferase [Pseudomonas aeruginosa PAO1]	-0.300833	0.131345	0.406482
9951329	Shikimate kinase (SK) (EC 2.7.1.71)	aroK	PA5039					PA5039	shikimate kinase [Pseudomonas aeruginosa PAO1]	-0.301418	0.369751	0.628753
9949485	Uncharacterized protein	PA3352						PA3352	hypothetical protein PA3352 [Pseudomonas aeruginosa PAO1]	-0.301659	0.255131	0.526403
9950685	UDP-N-acetylglucosamine 1-carboxyvinyltransferase (EC 2.5.1.7) (Enoylpyruvate transferase) (UDP-N-acetylglucosamine enolpyruvyl transferase) (EPT)	murA	PA4450					PA4450	UDP-N-acetylglucosamine 1-carboxyvinyltransferase [Pseudomonas aeruginosa PAO1]	-0.301723	0.724557	0.864416
9949871	Uncharacterized protein	wspB	PA3707					PA3707	hypothetical protein PA3707 [Pseudomonas aeruginosa PAO1]	-0.302135	0.120708	0.390134
9948879	Transaldolase (EC 2.2.1.2)	tal	PA2796					PA2796	transaldolase [Pseudomonas aeruginosa PAO1]	-0.303989	0.351935	0.611744
9949379	Uncharacterized protein	PA3255						PA3255	hypothetical protein PA3255 [Pseudomonas aeruginosa PAO1]	-0.304142	0.813692	0.912685
9949798	Acetyl-coenzyme A carboxylase carboxyl transferase subunit alpha (ACCase subunit alpha) (Acetyl-CoA carboxylase carboxyltransferase subunit alpha) (EC 6.4.1.2)	accA	PA3639					PA3639	acetyl-coenzyme A carboxylase carboxyl transferase (alpha subunit) [Pseudomonas aeruginosa PAO1]	-0.30436	0.271737	0.548782
9951629	Probable aldehyde dehydrogenase	PA5312						PA5312	probable aldehyde dehydrogenase [Pseudomonas aeruginosa PAO1]	-0.305247	0.0521498	0.27165
9948516	Ferrioxamine receptor FoxA	foxA	PA2466					PA2466	Ferrioxamine receptor FoxA [Pseudomonas aeruginosa PAO1]	-0.305779	0.71809	0.859742
9946366	Probable biotin biosynthesis protein bioH	PA0502						PA0502	probable biotin biosynthesis protein bioH [Pseudomonas aeruginosa PAO1]	-0.305891	0.136782	0.413253
9947617	Probable oxidoreductase	PA1648						PA1648	probable oxidoreductase [Pseudomonas aeruginosa PAO1]	-0.306116	0.606355	0.788762
9951751	Uncharacterized protein	PA5423						PA5423	hypothetical protein PA5423 [Pseudomonas aeruginosa PAO1]	-0.306293	0.202547	0.480987
9948738	Uncharacterized protein	PA2667						PA2667	conserved hypothetical protein [Pseudomonas aeruginosa PAO1]	-0.306538	0.447562	0.687057
9950546	Uncharacterized protein	PA4322						PA4322	conserved hypothetical protein [Pseudomonas aeruginosa PAO1]	-0.307346	0.15341	0.431705
9951236	Uncharacterized protein	PA4955						PA4955	hypothetical protein PA4955 [Pseudomonas aeruginosa PAO1]	-0.309092	0.135885	0.41224
9946815	Magnesium transporter MgtE	mgtE	PA0913					PA0913	probable Mg transporter MgtE [Pseudomonas aeruginosa PAO1]	-0.309424	0.443104	0.684218
9947777	Cysteine--tRNA ligase (EC 6.1.1.16) (Cysteinyl-tRNA synthetase) (CysRS)	cysS	PA1795					PA1795	cysteinyl-tRNA synthetase [Pseudomonas aeruginosa PAO1]	-0.311197	0.243375	0.516734
9949153	Ribosomal RNA large subunit methyltransferase K/L [Includes: 23S rRNA m2G2445 methyltransferase (EC 2.1.1.173) (rRNA (guanine-N(2)-)-methyltransferase RlmL); 23S rRNA m7G2069 methyltransferase (EC 2.1.1.264) (rRNA (guanine-N(7)-)-methyltransferase RlmK)]	rlmL	PA3048					PA3048	conserved hypothetical protein [Pseudomonas aeruginosa PAO1]	-0.311231	0.0429324	0.247865
9945956	Uncharacterized protein	PA0128						PA0128	conserved hypothetical protein [Pseudomonas aeruginosa PAO1]	-0.311869	0.555741	0.761181
9946541	Uncharacterized protein	PA0663						PA0663	hypothetical protein PA0663 [Pseudomonas aeruginosa PAO1]	-0.312057	0.788247	0.901694
9951477	Beta-ketoacyl-[acyl-carrier-protein] synthase FabY (Beta-ketoacyl-ACP synthase) (KAS) (EC 2.3.1.180) (Beta-ketoacyl synthase KAS I/II domain-containing enzyme)	fabY	PA5174					PA5174	probable beta-ketoacyl synthase [Pseudomonas aeruginosa PAO1]	-0.312108	0.141857	0.41761
9950714	Cytoplasmic axial filament protein	cafA	PA4477					PA4477	cytoplasmic axial filament protein [Pseudomonas aeruginosa PAO1]	-0.314143	0.146784	0.423664
9951138	Urease subunit gamma (EC 3.5.1.5) (Urea amidohydrolase subunit gamma)	ureA	PA4865					PA4865	urease gamma subunit [Pseudomonas aeruginosa PAO1]	-0.314699	0.769202	0.892425
9950162	Probable acyl-CoA dehydrogenase	PA3972						PA3972	probable acyl-CoA dehydrogenase [Pseudomonas aeruginosa PAO1]	-0.314699	0.0976869	0.356741
9949251	UvrABC system protein B (Protein UvrB) (Excinuclease ABC subunit B)	uvrB	PA3138					PA3138	excinuclease ABC subunit B [Pseudomonas aeruginosa PAO1]	-0.31505	0.211415	0.490707
9948517	Anti-sigma factor FoxR	foxR	PA2467					PA2467	Anti-sigma factor FoxR [Pseudomonas aeruginosa PAO1]	-0.317579	0.555223	0.761181
9946464	Ribosomal RNA small subunit methyltransferase A (EC 2.1.1.182) (16S rRNA (adenine(1518)-N(6)/adenine(1519)-N(6))-dimethyltransferase) (16S rRNA dimethyladenosine transferase) (16S rRNA dimethylase) (S-adenosylmethionine-6-N', N'-adenosyl(rRNA) dimethyltransferase)	rsmA	ksgA	PA0592				PA0592	rRNA (adenine-N6,N6)-dimethyltransferase [Pseudomonas aeruginosa PAO1]	-0.318313	0.0977601	0.356741
9946242	Uncharacterized protein	PA0389						PA0389	hypothetical protein PA0389 [Pseudomonas aeruginosa PAO1]	-0.318607	0.0688382	0.305754
9949621	Regulatory protein RhlR (Elastase modulator)	rhlR	lasM	vsmR	PA3477			PA3477	transcriptional regulator RhlR [Pseudomonas aeruginosa PAO1]	-0.318614	0.157138	0.433414
9946732	Peptidyl-prolyl cis-trans isomerase (EC 5.2.1.8)	slyD	PA0837					PA0837	peptidyl-prolyl cis-trans isomerase SlyD [Pseudomonas aeruginosa PAO1]	-0.319931	0.184099	0.462895
9948613	Probable short-chain dehydrogenase	PA2554						PA2554	probable short-chain dehydrogenase [Pseudomonas aeruginosa PAO1]	-0.319939	0.201223	0.479402
9948556	Uncharacterized protein	PA2503						PA2503	hypothetical protein PA2503 [Pseudomonas aeruginosa PAO1]	-0.320263	0.880231	0.938785
9947655	Methylthioribulose-1-phosphate dehydratase (MTRu-1-P dehydratase) (EC 4.2.1.109)	mtnB	PA1683					PA1683	probable sugar aldolase [Pseudomonas aeruginosa PAO1]	-0.320556	0.193344	0.471971
9947568	Probable transcriptional regulator	PA1603						PA1603	probable transcriptional regulator [Pseudomonas aeruginosa PAO1]	-0.322154	0.69563	0.846152
9947794	Probable binding protein component of ABC transporter	PA1810						PA1810	probable binding protein component of ABC transporter [Pseudomonas aeruginosa PAO1]	-0.323054	0.179344	0.460252
9946866	Uncharacterized protein	PA0959						PA0959	hypothetical protein PA0959 [Pseudomonas aeruginosa PAO1]	-0.325386	0.121368	0.390927
9946249	Twitching mobility protein	pilT	PA0395					PA0395	twitching motility protein PilT [Pseudomonas aeruginosa PAO1]	-0.325721	0.340426	0.603412
9950456	30S ribosomal protein S4	rpsD	PA4239					PA4239	30S ribosomal protein S4 [Pseudomonas aeruginosa PAO1]	-0.325853	0.0864761	0.339742
9945909	Uncharacterized protein	PA0084						PA0084	conserved hypothetical protein [Pseudomonas aeruginosa PAO1]	-0.326397	0.426287	0.67232
9950472	50S ribosomal protein L29	rpmC	PA4255					PA4255	50S ribosomal protein L29 [Pseudomonas aeruginosa PAO1]	-0.326533	0.812868	0.912592
9949788	S-(hydroxymethyl)glutathione dehydrogenase (EC 1.1.1.284)	adhC	PA3629					PA3629	alcohol dehydrogenase class III [Pseudomonas aeruginosa PAO1]	-0.326751	0.204148	0.48296
9950502	Nuclease SbcCD subunit C	sbcC	PA4282					PA4282	probable exonuclease [Pseudomonas aeruginosa PAO1]	-0.327172	0.59203	0.779108
9948219	Uncharacterized protein	PA2197						PA2197	conserved hypothetical protein [Pseudomonas aeruginosa PAO1]	-0.327607	0.14524	0.420235
9946963	Pyridoxine/pyridoxamine 5'-phosphate oxidase (EC 1.4.3.5) (PNP/PMP oxidase) (PNPOx) (Pyridoxal 5'-phosphate synthase)	pdxH	PA1049					PA1049	pyridoxine 5'-phosphate oxidase [Pseudomonas aeruginosa PAO1]	-0.327751	0.205684	0.484652
9951468	C4-dicarboxylate transport transcriptional regulatory protein DctD	dctD	PA5166					PA5166	probable two-component response regulator [Pseudomonas aeruginosa PAO1]	-0.328303	0.192832	0.471971
9947704	Uncharacterized protein	PA1728						PA1728	hypothetical protein PA1728 [Pseudomonas aeruginosa PAO1]	-0.328624	0.279987	0.553002
9949078	3-deoxy-manno-octulosonate cytidylyltransferase (EC 2.7.7.38) (CMP-2-keto-3-deoxyoctulosonic acid synthase) (CKS) (CMP-KDO synthase)	kdsB	PA2979					PA2979	3-deoxy-manno-octulosonate cytidylyltransferase [Pseudomonas aeruginosa PAO1]	-0.330407	0.116717	0.384726
9949047	Enoyl-[acyl-carrier-protein] reductase [NADH] (ENR) (EC 1.3.1.9) (Trans-2-enoyl-CoA reductase) (TER) (EC 1.3.1.44)	fabV	PA2950					PA2950	hypothetical protein PA2950 [Pseudomonas aeruginosa PAO1]	-0.330807	0.0591756	0.286299
9946540	N-acetyl-gamma-glutamyl-phosphate reductase (AGPR) (EC 1.2.1.38) (N-acetyl-glutamate semialdehyde dehydrogenase) (NAGSA dehydrogenase)	argC	PA0662					PA0662	N-acetyl-gamma-glutamyl-phosphate reductase [Pseudomonas aeruginosa PAO1]	-0.331133	0.790344	0.903071
9948946	Uncharacterized protein	PA2858						PA2858	conserved hypothetical protein [Pseudomonas aeruginosa PAO1]	-0.332298	0.0897168	0.346113
9949238	Heat-shock protein IbpA	ibpA	PA3126					PA3126	heat-shock protein IbpA [Pseudomonas aeruginosa PAO1]	-0.332513	0.900915	0.947466
9949782	Protein-L-isoaspartate O-methyltransferase (EC 2.1.1.77) (L-isoaspartyl protein carboxyl methyltransferase) (Protein L-isoaspartyl methyltransferase) (Protein-beta-aspartate methyltransferase) (PIMT)	pcm	PA3624					PA3624	L-isoaspartate protein carboxylmethyltransferase type II [Pseudomonas aeruginosa PAO1]	-0.334812	0.99399	0.997746
9949990	O-acetylserine synthase	cysE	PA3816					PA3816	O-acetylserine synthase [Pseudomonas aeruginosa PAO1]	-0.334859	0.0905355	0.347291
9950173	Endoribonuclease YbeY (EC 3.1.-.-)	ybeY	PA3982					PA3982	conserved hypothetical protein [Pseudomonas aeruginosa PAO1]	-0.335704	0.110821	0.377559
9946730	Phosphate acetyltransferase (EC 2.3.1.8) (Phosphotransacetylase)	pta	PA0835					PA0835	phosphate acetyltransferase [Pseudomonas aeruginosa PAO1]	-0.335906	0.185492	0.464541
9946289	Adenosylhomocysteinase (EC 3.3.1.1) (S-adenosyl-L-homocysteine hydrolase) (AdoHcyase)	ahcY	sahH	PA0432				PA0432	S-adenosyl-L-homocysteine hydrolase [Pseudomonas aeruginosa PAO1]	-0.335999	0.0715997	0.311915
9951509	Glutamate--cysteine ligase (EC 6.3.2.2) (Gamma-ECS) (GCS) (Gamma-glutamylcysteine synthetase)	gshA	PA5203					PA5203	glutamate--cysteine ligase [Pseudomonas aeruginosa PAO1]	-0.336856	0.463606	0.700752
9947409	Protein phosphatase CheZ (EC 3.1.3.-) (Chemotaxis protein CheZ)	cheZ	PA1457					PA1457	chemotaxis protein CheZ [Pseudomonas aeruginosa PAO1]	-0.337276	0.217265	0.496096
9951370	Glucans biosynthesis glucosyltransferase H (EC 2.4.1.-)	opgH	mdoH	PA5077				PA5077	periplasmic glucans biosynthesis protein MdoH [Pseudomonas aeruginosa PAO1]	-0.337386	0.0565283	0.279797
9948403	Uncharacterized protein	PA2365						PA2365	conserved hypothetical protein [Pseudomonas aeruginosa PAO1]	-0.337888	0.31543	0.582955
9948420	Uncharacterized protein	PA2380						PA2380	hypothetical protein PA2380 [Pseudomonas aeruginosa PAO1]	-0.338151	0.346015	0.607843
9947936	Uncharacterized protein	PA1940						PA1940	hypothetical protein PA1940 [Pseudomonas aeruginosa PAO1]	-0.338325	0.233035	0.510733
9946158	Uncharacterized protein	PA0312						PA0312	conserved hypothetical protein [Pseudomonas aeruginosa PAO1]	-0.339526	0.907282	0.950352
9949427	Long-chain-fatty-acid--CoA ligase	fadD1	PA3299					PA3299	long-chain-fatty-acid--CoA ligase [Pseudomonas aeruginosa PAO1]	-0.33975	0.0532602	0.271654
9950068	Na(+)/H(+) antiporter NhaP (Sodium/proton antiporter NhaP)	nhaP	PA3887					PA3887	Na+/H+ antiporter NhaP [Pseudomonas aeruginosa PAO1]	-0.341806	0.588812	0.778153
9949770	Uncharacterized protein	PA3613						PA3613	hypothetical protein PA3613 [Pseudomonas aeruginosa PAO1]	-0.342049	0.0478606	0.259172
9948500	Uncharacterized protein	PA2452						PA2452	hypothetical protein PA2452 [Pseudomonas aeruginosa PAO1]	-0.34268	0.0426803	0.247588
9946333	Probable transmembrane sensor	PA0471						PA0471	probable transmembrane sensor [Pseudomonas aeruginosa PAO1]	-0.343165	0.870367	0.935765
9950993	Glucose-6-phosphate isomerase (GPI) (EC 5.3.1.9) (Phosphoglucose isomerase) (PGI) (Phosphohexose isomerase) (PHI)	pgi	PA4732					PA4732	glucose-6-phosphate isomerase [Pseudomonas aeruginosa PAO1]	-0.343224	0.128363	0.403454
9947575	Beta-ketoacyl-ACP synthase I	fabB	PA1609					PA1609	beta-ketoacyl-ACP synthase I [Pseudomonas aeruginosa PAO1]	-0.343538	0.13186	0.406482
9951466	dTDP-4-dehydrorhamnose 3,5-epimerase (EC 5.1.3.13) (Thymidine diphospho-4-keto-rhamnose 3,5-epimerase) (dTDP-4-keto-6-deoxyglucose 3,5-epimerase) (dTDP-6-deoxy-D-xylo-4-hexulose 3,5-epimerase) (dTDP-L-rhamnose synthase)	rmlC	PA5164					PA5164	dTDP-4-dehydrorhamnose 3,5-epimerase [Pseudomonas aeruginosa PAO1]	-0.345469	0.27725	0.55147
9950258	Probable thioredoxin	PA4061						PA4061	probable thioredoxin [Pseudomonas aeruginosa PAO1]	-0.346387	0.128279	0.403454
9950483	Elongation factor Tu (EF-Tu)	tufA	PA4265;	tufB	PA4277			PA4265;	elongation factor Tu [Pseudomonas aeruginosa PAO1]	-0.346415	0.381094	0.636775
9946793	HTH-type transcriptional regulator ArgR	argR	PA0893					PA0893	transcriptional regulator ArgR [Pseudomonas aeruginosa PAO1]	-0.3474	0.871342	0.935765
9947407	RNA polymerase sigma factor FliA (RNA polymerase sigma factor for flagellar operon) (Sigma F) (Sigma-28)	fliA	rpoF	PA1455				PA1455	sigma factor FliA [Pseudomonas aeruginosa PAO1]	-0.347441	0.164711	0.441913
9947787	DNA-binding protein HU-beta	hupB	PA1804					PA1804	DNA-binding protein HU [Pseudomonas aeruginosa PAO1]	-0.348806	0.0787942	0.32624
9949104	Uncharacterized protein	PA3003						PA3003	hypothetical protein PA3003 [Pseudomonas aeruginosa PAO1]	-0.348901	0.466722	0.702452
9950956	Uncharacterized protein	PA4698						PA4698	hypothetical protein PA4698 [Pseudomonas aeruginosa PAO1]	-0.349082	0.397218	0.650368
15597595	Pyoverdine synthetase D	pvdD	PA2399					PA2399	pyoverdine synthetase D [Pseudomonas aeruginosa PAO1]	-0.35038	0.111167	0.377647
9951367	Probable ATP-binding component of ABC transporter	PA5074						PA5074	probable ATP-binding component of ABC transporter [Pseudomonas aeruginosa PAO1]	-0.350427	0.0950436	0.351721
9947394	Flagellar motor switch protein FliM	fliM	PA1443					PA1443	flagellar motor switch protein FliM [Pseudomonas aeruginosa PAO1]	-0.350582	0.0712949	0.311717
9945926	Uncharacterized protein	PA0100						PA0100	hypothetical protein PA0100 [Pseudomonas aeruginosa PAO1]	-0.35061	0.0619653	0.292452
9950854	Uncharacterized protein	PA4604						PA4604	conserved hypothetical protein [Pseudomonas aeruginosa PAO1]	-0.350828	0.783678	0.899644
9950458	30S ribosomal protein S13	rpsM	PA4241					PA4241	30S ribosomal protein S13 [Pseudomonas aeruginosa PAO1]	-0.352212	0.103406	0.367917
9946771	Phenylalanine-4-hydroxylase (PAH) (EC 1.14.16.1) (Phe-4-monooxygenase)	phhA	PA0872					PA0872	phenylalanine-4-hydroxylase [Pseudomonas aeruginosa PAO1]	-0.352518	0.38188	0.637301
9950189	Octanoyltransferase (EC 2.3.1.181) (Lipoate-protein ligase B) (Lipoyl/octanoyl transferase) (Octanoyl-[acyl-carrier-protein]-protein N-octanoyltransferase)	lipB	PA3997					PA3997	lipoate-protein ligase B [Pseudomonas aeruginosa PAO1]	-0.352597	0.50173	0.724331
9951016	Probable RNA-binding protein PA4753	PA4753						PA4753	conserved hypothetical protein [Pseudomonas aeruginosa PAO1]	-0.352833	0.140383	0.414822
9949223	Acetyl-coenzyme A carboxylase carboxyl transferase subunit beta (ACCase subunit beta) (Acetyl-CoA carboxylase carboxyltransferase subunit beta) (EC 6.4.1.2)	accD	PA3112					PA3112	acetyl-CoA carboxylase beta subunit [Pseudomonas aeruginosa PAO1]	-0.353119	0.0990437	0.359757
9951757	Aspartate ammonia-lyase (Aspartase) (EC 4.3.1.1)	aspA	PA5429					PA5429	aspartate ammonia-lyase [Pseudomonas aeruginosa PAO1]	-0.353256	0.0319495	0.230791
9946142	Probable glutamine synthetase	spuB	PA0298					PA0298	probable glutamine synthetase [Pseudomonas aeruginosa PAO1]	-0.353863	0.139697	0.414822
9951830	Homoserine kinase (HK) (HSK) (EC 2.7.1.39)	thrB	PA5495					PA5495	homoserine kinase [Pseudomonas aeruginosa PAO1]	-0.353953	0.0994573	0.360705
9950652	Ribosomal RNA small subunit methyltransferase H (EC 2.1.1.199) (16S rRNA m(4)C1402 methyltransferase) (rRNA (cytosine-N(4)-)-methyltransferase RsmH)	rsmH	mraW	PA4420				PA4420	conserved hypothetical protein [Pseudomonas aeruginosa PAO1]	-0.354464	0.0900482	0.346718
9947849	Uncharacterized protein	PA1860						PA1860	hypothetical protein PA1860 [Pseudomonas aeruginosa PAO1]	-0.354672	0.155287	0.433414
15596747	Uncharacterized protein	PA1550						PA1550	hypothetical protein PA1550 [Pseudomonas aeruginosa PAO1]	-0.354784	0.304852	0.570781
9949057	Uncharacterized protein	PA2959						PA2959	conserved hypothetical protein [Pseudomonas aeruginosa PAO1]	-0.35491	0.771611	0.893226
9947774	UDP-2,3-diacylglucosamine hydrolase (EC 3.6.1.54) (UDP-2,3-diacylglucosamine diphosphatase)	lpxH	PA1792					PA1792	conserved hypothetical protein [Pseudomonas aeruginosa PAO1]	-0.355057	0.0845328	0.336762
9947486	Cell division protein ZipA	zipA	PA1528					PA1528	cell division protein ZipA [Pseudomonas aeruginosa PAO1]	-0.355472	0.127122	0.40242
9949349	Probable ATP-binding/permease fusion ABC transporter	PA3228						PA3228	probable ATP-binding/permease fusion ABC transporter [Pseudomonas aeruginosa PAO1]	-0.355524	0.238088	0.514079
9948491	Serine hydroxymethyltransferase 2 (SHMT 2) (Serine methylase 2) (EC 2.1.2.1)	glyA2	PA2444					PA2444	serine hydroxymethyltransferase [Pseudomonas aeruginosa PAO1]	-0.355636	0.0621697	0.292452
9946068	3-carboxy-cis,cis-muconate cycloisomerase (EC 5.5.1.2) (3-carboxymuconate lactonizing enzyme) (CMLE)	pcaB	PA0230					PA0230	3-carboxy-cis,cis-muconate cycloisomerase [Pseudomonas aeruginosa PAO1]	-0.356673	0.248856	0.521247
9946462	Bis(5'-nucleosyl)-tetraphosphatase, symmetrical (EC 3.6.1.41) (Ap4A hydrolase) (Diadenosine 5',5'''-P1,P4-tetraphosphate pyrophosphohydrolase) (Diadenosine tetraphosphatase)	apaH	PA0590					PA0590	bis(5'-nucleosyl)-tetraphosphatase [Pseudomonas aeruginosa PAO1]	-0.356947	0.138451	0.413253
9951112	Uncharacterized protein	PA4842						PA4842	hypothetical protein PA4842 [Pseudomonas aeruginosa PAO1]	-0.358439	0.223594	0.502504
9949595	UPF0502 protein PA3453	PA3453						PA3453	conserved hypothetical protein [Pseudomonas aeruginosa PAO1]	-0.358972	0.0922973	0.349221
281307402	Probable transcriptional regulator	PA3699						PA3699	Chain A, Structure Of A Putative Tetr Transcriptional Regulator (Pa3699) From Pseudomonas Aeruginosa Pa01	-0.359297	0.0491917	0.26336
9949318	Segregation and condensation protein A	PA3198						PA3198	conserved hypothetical protein [Pseudomonas aeruginosa PAO1]	-0.359607	0.152806	0.431705
9949278	30S ribosomal protein S1	rpsA	PA3162					PA3162	30S ribosomal protein S1 [Pseudomonas aeruginosa PAO1]	-0.360803	0.0832994	0.335908
9945878	Uncharacterized protein	PA0055						PA0055	hypothetical protein PA0055 [Pseudomonas aeruginosa PAO1]	-0.360817	0.0870101	0.341081
9946069	Beta-ketoadipate enol-lactone hydrolase	pcaD	PA0231					PA0231	beta-ketoadipate enol-lactone hydrolase [Pseudomonas aeruginosa PAO1]	-0.361393	0.165716	0.442596
9951832	NrdJa	nrdJa	PA5497					PA5497	NrdJa [Pseudomonas aeruginosa PAO1]	-0.361822	0.0574113	0.282939
9951821	Uncharacterized protein	PA5487						PA5487	hypothetical protein PA5487 [Pseudomonas aeruginosa PAO1]	-0.361989	0.162308	0.438487
9951446	Uncharacterized protein	PA5146						PA5146	hypothetical protein PA5146 [Pseudomonas aeruginosa PAO1]	-0.36212	0.0728213	0.314316
9949255	Nucleotide sugar epimerase/dehydratase WbpM	wbpM	PA3141					PA3141	nucleotide sugar epimerase/dehydratase WbpM [Pseudomonas aeruginosa PAO1]	-0.362312	0.0930061	0.349661
9948589	Probable thiol peroxidase (EC 1.11.1.-)	tpx	PA2532					PA2532	thiol peroxidase [Pseudomonas aeruginosa PAO1]	-0.363483	0.114177	0.382371
9949477	ATP-dependent DNA helicase RecQ	recQ	PA3344					PA3344	ATP-dependent DNA helicase RecQ [Pseudomonas aeruginosa PAO1]	-0.364372	0.0793146	0.32624
9950045	Pyocin protein	PA3866						PA3866	pyocin protein [Pseudomonas aeruginosa PAO1]	-0.365827	0.119743	0.390134
9948823	Probable hydrolase	PA2745						PA2745	probable hydrolase [Pseudomonas aeruginosa PAO1]	-0.366031	0.343427	0.60555
9949049	Electron transfer flavoprotein subunit beta (Beta-ETF) (Electron transfer flavoprotein small subunit) (ETFSS)	etfB	PA2952					PA2952	electron transfer flavoprotein beta-subunit [Pseudomonas aeruginosa PAO1]	-0.366739	0.103269	0.367917
9949218	O-succinylhomoserine sulfhydrylase (OSH sulfhydrylase) (OSHS sulfhydrylase) (EC 2.5.1.-)	metZ	PA3107					PA3107	o-succinylhomoserine sulfhydrylase [Pseudomonas aeruginosa PAO1]	-0.367231	0.0269854	0.21452
9949235	Uncharacterized protein	PA3123						PA3123	conserved hypothetical protein [Pseudomonas aeruginosa PAO1]	-0.367741	0.174056	0.453393
9949899	Uncharacterized protein	PA3732						PA3732	conserved hypothetical protein [Pseudomonas aeruginosa PAO1]	-0.368089	0.862871	0.934513
9947882	Probable glutathione S-transferase	PA1890						PA1890	probable glutathione S-transferase [Pseudomonas aeruginosa PAO1]	-0.368461	0.118047	0.387097
9950172	Uncharacterized protein	PA3981						PA3981	conserved hypothetical protein [Pseudomonas aeruginosa PAO1]	-0.368983	0.0499783	0.265441
9948594	Probable acyltransferase	PA2537						PA2537	probable acyltransferase [Pseudomonas aeruginosa PAO1]	-0.369348	0.105808	0.369158
9946305	Uncharacterized protein	PA0446						PA0446	conserved hypothetical protein [Pseudomonas aeruginosa PAO1]	-0.369457	0.0464788	0.255339
9951634	Probable binding protein component of ABC dipeptide transporter	PA5317						PA5317	probable binding protein component of ABC dipeptide transporter [Pseudomonas aeruginosa PAO1]	-0.369706	0.408293	0.656903
9946281	Multidrug resistance protein MexA	mexA	PA0425					PA0425	Resistance-Nodulation-Cell Division (RND) multidrug efflux membrane fusion protein MexA precursor [Pseudomonas aeruginosa PAO1]	-0.370673	0.174175	0.453393
9951649	Orotate phosphoribosyltransferase (OPRT) (OPRTase) (EC 2.4.2.10)	pyrE	PA5331					PA5331	orotate phosphoribosyltransferase [Pseudomonas aeruginosa PAO1]	-0.371246	0.177447	0.458254
9951232	Oligoribonuclease (EC 3.1.-.-)	orn	PA4951					PA4951	oligoribonuclease [Pseudomonas aeruginosa PAO1]	-0.372526	0.264198	0.538662
9946134	Uncharacterized protein	PA0290						PA0290	hypothetical protein PA0290 [Pseudomonas aeruginosa PAO1]	-0.372658	0.115223	0.382775
9945989	Probable Resistance-Nodulation-Cell Division (RND) efflux transporter	PA0158						PA0158	probable Resistance-Nodulation-Cell Division (RND) efflux transporter [Pseudomonas aeruginosa PAO1]	-0.373073	0.0787846	0.32624
9951668	DNA-binding protein HU-alpha	hupA	PA5348					PA5348	probable DNA-binding protein [Pseudomonas aeruginosa PAO1]	-0.373326	0.424572	0.67141
9948650	2-heptyl-3-hydroxy-4(1H)-quinolone synthase (EC 1.14.13.182) (2-heptyl-3,4-dihydroxyquinoline synthase)	pqsH	PA2587					PA2587	probable FAD-dependent monooxygenase [Pseudomonas aeruginosa PAO1]	-0.373532	0.0424218	0.247303
9949387	Recombination-associated protein RdgC	rdgC	PA3263					PA3263	conserved hypothetical protein [Pseudomonas aeruginosa PAO1]	-0.374647	0.0420315	0.247303
9949360	Uncharacterized protein	PA3238						PA3238	hypothetical protein PA3238 [Pseudomonas aeruginosa PAO1]	-0.374773	0.723193	0.864073
9951588	Protein CyaY	cyaY	PA5275					PA5275	conserved hypothetical protein [Pseudomonas aeruginosa PAO1]	-0.376702	0.0665821	0.301537
9949630	Uncharacterized protein	PA3485						PA3485	hypothetical protein PA3485 [Pseudomonas aeruginosa PAO1]	-0.378316	0.464958	0.701518
9946769	Aromatic-amino-acid aminotransferase (EC 2.6.1.57)	phhC	PA0870					PA0870	aromatic amino acid aminotransferase [Pseudomonas aeruginosa PAO1]	-0.378634	0.160879	0.437336
9949182	Uncharacterized protein	PA3075						PA3075	hypothetical protein PA3075 [Pseudomonas aeruginosa PAO1]	-0.379074	0.643965	0.811514
9946347	Uncharacterized protein	PA0484						PA0484	conserved hypothetical protein [Pseudomonas aeruginosa PAO1]	-0.380387	0.0709	0.311308
9946660	GTPase Era	era	PA0771					PA0771	GTP-binding protein Era [Pseudomonas aeruginosa PAO1]	-0.381679	0.0987559	0.359264
9948247	Uncharacterized protein	PA2222						PA2222	hypothetical protein PA2222 [Pseudomonas aeruginosa PAO1]	-0.382412	0.078788	0.32624
9949380	Probable oxidoreductase	PA3256						PA3256	probable oxidoreductase [Pseudomonas aeruginosa PAO1]	-0.382782	0.163891	0.440212
9949896	Uncharacterized protein	PA3729						PA3729	conserved hypothetical protein [Pseudomonas aeruginosa PAO1]	-0.383033	0.0423763	0.247303
9950000	Uncharacterized protein	PA3825						PA3825	hypothetical protein PA3825 [Pseudomonas aeruginosa PAO1]	-0.383136	0.644124	0.811514
9947131	NAD(P)H-dependent FMN reductase PA1204 (EC 1.-.-.-)	PA1204						PA1204	conserved hypothetical protein [Pseudomonas aeruginosa PAO1]	-0.383448	0.221492	0.499946
9950150	Probable ATP-dependent helicase	PA3961						PA3961	probable ATP-dependent helicase [Pseudomonas aeruginosa PAO1]	-0.383839	0.579335	0.771032
9949814	Ribosome-recycling factor (RRF) (Ribosome-releasing factor)	frr	PA3653					PA3653	ribosome recycling factor [Pseudomonas aeruginosa PAO1]	-0.384219	0.763093	0.889271
9949124	Uncharacterized protein	PA3021						PA3021	hypothetical protein PA3021 [Pseudomonas aeruginosa PAO1]	-0.384667	0.469543	0.704656
9949959	Uncharacterized protein	PA3787						PA3787	conserved hypothetical protein [Pseudomonas aeruginosa PAO1]	-0.385766	0.172738	0.452144
9950371	Uncharacterized protein	PA4163						PA4163	hypothetical protein PA4163 [Pseudomonas aeruginosa PAO1]	-0.385829	0.0792712	0.32624
9947985	NAD+ dependent aldehyde dehydrogenase ExaC	exaC	PA1984					PA1984	NAD+ dependent aldehyde dehydrogenase ExaC [Pseudomonas aeruginosa PAO1]	-0.386037	0.578404	0.770477
9951405	Uncharacterized protein	PA5109						PA5109	hypothetical protein PA5109 [Pseudomonas aeruginosa PAO1]	-0.386827	0.81146	0.912218
9950695	Lipopolysaccharide export system protein LptC	lptC	PA4459					PA4459	conserved hypothetical protein [Pseudomonas aeruginosa PAO1]	-0.387486	0.697973	0.848047
9946864	Porin D (EC 3.4.21.-) (Imipenem/basic amino acid-specific outer membrane pore) (Outer membrane protein D2)	oprD	PA0958					PA0958	Basic amino acid, basic peptide and imipenem outer membrane porin OprD precursor [Pseudomonas aeruginosa PAO1]	-0.387781	0.043013	0.247865
9950334	Probable sulfite or nitrite reductase	PA4130						PA4130	probable sulfite or nitrite reductase [Pseudomonas aeruginosa PAO1]	-0.387822	0.222584	0.500973
9951562	Probable ATP-binding component of ABC transporter	PA5252						PA5252	probable ATP-binding component of ABC transporter [Pseudomonas aeruginosa PAO1]	-0.387952	0.299928	0.565598
9949319	Uncharacterized protein	PA3199						PA3199	conserved hypothetical protein [Pseudomonas aeruginosa PAO1]	-0.388085	0.166148	0.44292
9946867	Protein SlyX homolog	slyX	PA0960					PA0960	hypothetical protein PA0960 [Pseudomonas aeruginosa PAO1]	-0.388882	0.198385	0.475911
9949076	UDP-N-acetylenolpyruvoylglucosamine reductase (EC 1.3.1.98) (UDP-N-acetylmuramate dehydrogenase)	murB	PA2977					PA2977	UDP-N-acetylpyruvoylglucosamine reductase [Pseudomonas aeruginosa PAO1]	-0.390144	0.348435	0.609826
9949734	Cys-tRNA(Pro)/Cys-tRNA(Cys) deacylase (EC 4.2.-.-)	PA3580						PA3580	conserved hypothetical protein [Pseudomonas aeruginosa PAO1]	-0.390154	0.159133	0.4356
9948911	Glutathione peroxidase	PA2826						PA2826	probable glutathione peroxidase [Pseudomonas aeruginosa PAO1]	-0.39106	0.0883059	0.344612
9950109	Probable medium-chain acyl-CoA ligase	PA3924						PA3924	probable medium-chain acyl-CoA ligase [Pseudomonas aeruginosa PAO1]	-0.39124	0.0259268	0.214393
9950505	RecBCD enzyme subunit RecC (EC 3.1.11.5) (Exonuclease V subunit RecC) (Helicase/nuclease RecBCD subunit RecC)	recC	PA4285					PA4285	exodeoxyribonuclease V gamma chain [Pseudomonas aeruginosa PAO1]	-0.392286	0.402365	0.652904
9947788	Peptidylprolyl isomerase (EC 5.2.1.8)	ppiD	PA1805					PA1805	peptidyl-prolyl cis-trans isomerase D [Pseudomonas aeruginosa PAO1]	-0.392528	0.0864823	0.339742
9946667	Inhibitor of cysteine peptidase	icp	PA0778					PA0778	inhibitor of cysteine peptidase [Pseudomonas aeruginosa PAO1]	-0.393585	0.068764	0.305754
9949425	Probable ATP-dependent helicase	PA3297						PA3297	probable ATP-dependent helicase [Pseudomonas aeruginosa PAO1]	-0.394942	0.91283	0.953624
9951214	30S ribosomal protein S6	rpsF	PA4935					PA4935	30S ribosomal protein S6 [Pseudomonas aeruginosa PAO1]	-0.39547	0.494592	0.720378
9950835	Cytochrome c551 peroxidase (CCP) (Cytochrome c peroxidase) (EC 1.11.1.5)	ccpA	PA4587					PA4587	cytochrome c551 peroxidase precursor [Pseudomonas aeruginosa PAO1]	-0.396816	0.238641	0.514079
9950023	Uncharacterized protein	PA3846						PA3846	hypothetical protein PA3846 [Pseudomonas aeruginosa PAO1]	-0.399183	0.322657	0.588975
9951548	Transcription termination factor Rho (EC 3.6.4.-) (ATP-dependent helicase Rho)	rho	PA5239					PA5239	transcription termination factor Rho [Pseudomonas aeruginosa PAO1]	-0.400892	0.0634261	0.294673
9946470	Probable nucleotidyl transferase	PA0597						PA0597	probable nucleotidyl transferase [Pseudomonas aeruginosa PAO1]	-0.401179	0.19622	0.474406
9946659	Ribonuclease 3 (EC 3.1.26.3) (Ribonuclease III) (RNase III)	rnc	PA0770					PA0770	ribonuclease III [Pseudomonas aeruginosa PAO1]	-0.402098	0.511565	0.728911
9949815	Uridylate kinase (UK) (EC 2.7.4.22) (Uridine monophosphate kinase) (UMP kinase) (UMPK)	pyrH	PA3654					PA3654	uridylate kinase [Pseudomonas aeruginosa PAO1]	-0.40219	0.114979	0.382775
9951428	Glutaredoxin	grx	PA5129					PA5129	glutaredoxin [Pseudomonas aeruginosa PAO1]	-0.404715	0.0928846	0.349661
9951517	Probable secretion pathway ATPase	PA5210						PA5210	probable secretion pathway ATPase [Pseudomonas aeruginosa PAO1]	-0.404716	0.0751292	0.319029
9946873	Holliday junction ATP-dependent DNA helicase RuvA (EC 3.6.4.12)	ruvA	PA0966					PA0966	Holliday junction DNA helicase RuvA [Pseudomonas aeruginosa PAO1]	-0.405259	0.193125	0.471971
9951255	Uncharacterized protein	PA4972						PA4972	hypothetical protein PA4972 [Pseudomonas aeruginosa PAO1]	-0.405767	0.441394	0.682393
9945953	Uncharacterized protein	PA0125						PA0125	hypothetical protein PA0125 [Pseudomonas aeruginosa PAO1]	-0.405928	0.323315	0.588975
9947080	Probable two-component response regulator	PA1157						PA1157	probable two-component response regulator [Pseudomonas aeruginosa PAO1]	-0.406054	0.446148	0.687011
9946250	Twitching motility protein PilU	pilU	PA0396					PA0396	twitching motility protein PilU [Pseudomonas aeruginosa PAO1]	-0.406563	0.350378	0.611414
9948896	Probable ATP-binding component of ABC transporter	PA2812						PA2812	probable ATP-binding component of ABC transporter [Pseudomonas aeruginosa PAO1]	-0.407195	0.214468	0.493046
9946823	Uncharacterized protein	PA0920						PA0920	hypothetical protein PA0920 [Pseudomonas aeruginosa PAO1]	-0.407531	0.0749732	0.31894
9951352	Polyhydroxyalkanoate synthesis protein PhaF	phaF	PA5060					PA5060	polyhydroxyalkanoate synthesis protein PhaF [Pseudomonas aeruginosa PAO1]	-0.408036	0.290954	0.558576
9949090	Probable phosphodiesterase	PA2990						PA2990	probable phosphodiesterase [Pseudomonas aeruginosa PAO1]	-0.409311	0.116322	0.384456
9951233	Putative ribosome biogenesis GTPase RsgA (EC 3.6.1.-)	rsgA	PA4952					PA4952	conserved hypothetical protein [Pseudomonas aeruginosa PAO1]	-0.410598	0.216569	0.494984
9946461	Thiosulfate sulfurtransferase GlpE (EC 2.8.1.1)	glpE	PA0589					PA0589	conserved hypothetical protein [Pseudomonas aeruginosa PAO1]	-0.41239	0.433968	0.676749
9946820	Probable potassium transport system protein kup	kup	PA0917					PA0917	potassium uptake protein Kup [Pseudomonas aeruginosa PAO1]	-0.413013	0.286628	0.556436
9947403	Flagellar biosynthesis protein FlhA	flhA	PA1452					PA1452	flagellar biosynthesis protein FlhA [Pseudomonas aeruginosa PAO1]	-0.415078	0.236445	0.511858
9951465	Glucose-1-phosphate thymidylyltransferase (EC 2.7.7.24)	rmlA	PA5163					PA5163	glucose-1-phosphate thymidylyltransferase [Pseudomonas aeruginosa PAO1]	-0.415673	0.0306474	0.227543
9951175	Probable aldehyde dehydrogenase	PA4899						PA4899	probable aldehyde dehydrogenase [Pseudomonas aeruginosa PAO1]	-0.416066	0.0344186	0.237592
9948433	PvdP	pvdP	PA2392					PA2392	PvdP [Pseudomonas aeruginosa PAO1]	-0.417305	0.0406892	0.246774
9948027	UTP--glucose-1-phosphate uridylyltransferase (EC 2.7.7.9) (Alpha-D-glucosyl-1-phosphate uridylyltransferase) (UDP-glucose pyrophosphorylase) (UDPGP) (Uridine diphosphoglucose pyrophosphorylase)	galU	PA2023					PA2023	UTP--glucose-1-phosphate uridylyltransferase [Pseudomonas aeruginosa PAO1]	-0.417494	0.0979553	0.356902
9948335	AmbD	ambD	PA2303					PA2303	AmbD [Pseudomonas aeruginosa PAO1]	-0.417553	0.105752	0.369158
9946906	PqsB	pqsB	PA0997					PA0997	PqsB [Pseudomonas aeruginosa PAO1]	-0.418067	0.116428	0.384456
9950725	Uncharacterized protein	PA4487						PA4487	conserved hypothetical protein [Pseudomonas aeruginosa PAO1]	-0.418245	0.726675	0.866048
9950032	Uncharacterized protein	PA3855						PA3855	hypothetical protein PA3855 [Pseudomonas aeruginosa PAO1]	-0.418257	0.0610728	0.291771
9951900	ATP synthase subunit a (ATP synthase F0 sector subunit a) (F-ATPase subunit 6)	atpB	PA5560					PA5560	ATP synthase A chain [Pseudomonas aeruginosa PAO1]	-0.4191	0.0962713	0.353112
9946449	Uncharacterized protein	PA0578						PA0578	conserved hypothetical protein [Pseudomonas aeruginosa PAO1]	-0.419805	0.950371	0.976511
9951569	Uncharacterized protein	PA5258						PA5258	hypothetical protein PA5258 [Pseudomonas aeruginosa PAO1]	-0.420029	0.457916	0.69614
9951223	GTPase HflX (GTP-binding protein HflX)	hflX	PA4943					PA4943	probable GTP-binding protein [Pseudomonas aeruginosa PAO1]	-0.420982	0.133625	0.409416
9949757	50S ribosomal protein L31 type B	rpmE2	PA3601					PA3601	conserved hypothetical protein [Pseudomonas aeruginosa PAO1]	-0.422898	0.514988	0.73158
9950693	Arabinose 5-phosphate isomerase KdsD (API) (EC 5.3.1.13) (Pa-KdsD)	kdsD	PA4457					PA4457	arabinose-5-phosphate isomerase KdsD [Pseudomonas aeruginosa PAO1]	-0.423428	0.158539	0.435244
9951283	Uncharacterized protein	PA4998						PA4998	conserved hypothetical protein [Pseudomonas aeruginosa PAO1]	-0.423546	0.131382	0.406482
9948432	Probable outer membrane protein	opmQ	PA2391					PA2391	probable outer membrane protein precursor [Pseudomonas aeruginosa PAO1]	-0.423632	0.080455	0.327677
9948722	Methyl-accepting chemotaxis protein PA2652	PA2652						PA2652	probable chemotaxis transducer [Pseudomonas aeruginosa PAO1]	-0.424028	0.104953	0.369158
9951419	Uncharacterized protein	PA5121						PA5121	hypothetical protein PA5121 [Pseudomonas aeruginosa PAO1]	-0.424685	0.224967	0.502504
9950675	Uncharacterized protein	PA4441						PA4441	hypothetical protein PA4441 [Pseudomonas aeruginosa PAO1]	-0.425267	0.0671453	0.302057
9951302	Pyruvate dehydrogenase E1 component (PDH E1 component) (EC 1.2.4.1)	aceE	aceA	PA5015				PA5015	pyruvate dehydrogenase [Pseudomonas aeruginosa PAO1]	-0.426219	0.0765571	0.322195
9950476	30S ribosomal protein S19	rpsS	PA4259					PA4259	30S ribosomal protein S19 [Pseudomonas aeruginosa PAO1]	-0.428153	0.10101	0.363795
9947560	Chaperone protein HtpG (Heat shock protein HtpG) (High temperature protein G)	htpG	PA1596					PA1596	heat shock protein HtpG [Pseudomonas aeruginosa PAO1]	-0.42934	0.239178	0.514299
9947732	Transcriptional regulator CysB	cysB	PA1754					PA1754	transcriptional regulator CysB [Pseudomonas aeruginosa PAO1]	-0.429396	0.0319647	0.230791
9951013	ATP-dependent zinc metalloprotease FtsH (EC 3.4.24.-)	ftsH	PA4751					PA4751	cell division protein FtsH [Pseudomonas aeruginosa PAO1]	-0.430101	0.034209	0.237592
9947819	Probable oxidoreductase	PA1833						PA1833	probable oxidoreductase [Pseudomonas aeruginosa PAO1]	-0.431204	0.0265124	0.214459
9946900	Uncharacterized protein	PA0991						PA0991	hypothetical protein PA0991 [Pseudomonas aeruginosa PAO1]	-0.431684	0.0460129	0.255339
9949377	Probable ATP-binding component of ABC transporter	PA3254						PA3254	probable ATP-binding component of ABC transporter [Pseudomonas aeruginosa PAO1]	-0.431879	0.0503461	0.266518
9951043	Uncharacterized HTH-type transcriptional regulator PA4778	PA4778						PA4778	CueR [Pseudomonas aeruginosa PAO1]	-0.431885	0.106166	0.369158
9947218	Probable transcriptional regulator	PA1283						PA1283	probable transcriptional regulator [Pseudomonas aeruginosa PAO1]	-0.43221	0.730254	0.868722
9946630	Probable enoyl-CoA hydratase/isomerase	PA0744						PA0744	probable enoyl-CoA hydratase/isomerase [Pseudomonas aeruginosa PAO1]	-0.433169	0.0157798	0.178259
15598116	Probable chemotaxis transducer	PA2920						PA2920	chemotaxis transducer [Pseudomonas aeruginosa PAO1]	-0.433702	0.0424016	0.247303
9950230	Uncharacterized protein	PA4035						PA4035	hypothetical protein PA4035 [Pseudomonas aeruginosa PAO1]	-0.434325	0.423127	0.670471
9948878	tRNA-dihydrouridine(20/20a) synthase (EC 1.3.1.-) (EC 1.3.1.91) (U20-specific dihydrouridine synthase) (U20-specific Dus) (tRNA-dihydrouridine synthase A)	dusA	PA2795					PA2795	conserved hypothetical protein [Pseudomonas aeruginosa PAO1]	-0.434557	0.706805	0.85359
9950335	Probable iron-sulfur protein	PA4131						PA4131	probable iron-sulfur protein [Pseudomonas aeruginosa PAO1]	-0.435332	0.224486	0.502504
9950996	Uncharacterized protein	PA4735						PA4735	hypothetical protein PA4735 [Pseudomonas aeruginosa PAO1]	-0.43553	0.183356	0.462617
9945830	Probable 2-OH-lauroyltransferase	PA0011						PA0011	probable 2-OH-lauroyltransferase [Pseudomonas aeruginosa PAO1]	-0.436009	0.240734	0.515279
9948992	Probable outer membrane protein	PA2900						PA2900	probable outer membrane protein precursor [Pseudomonas aeruginosa PAO1]	-0.436985	0.230361	0.508302
9948128	Probable major facilitator superfamily (MFS) transporter	PA2114						PA2114	probable major facilitator superfamily (MFS) transporter [Pseudomonas aeruginosa PAO1]	-0.437552	0.157543	0.434025
9946832	Histidine kinase (EC 2.7.13.3)	gacS	PA0928					PA0928	sensor/response regulator hybrid [Pseudomonas aeruginosa PAO1]	-0.439052	0.0718802	0.31254
9949460	Uncharacterized protein	PA3329						PA3329	hypothetical protein PA3329 [Pseudomonas aeruginosa PAO1]	-0.439585	0.544637	0.754228
9949472	Uncharacterized protein	PA3340						PA3340	hypothetical protein PA3340 [Pseudomonas aeruginosa PAO1]	-0.439758	0.0311615	0.229197
9946450	30S ribosomal protein S21	rpsU	PA0579					PA0579	30S ribosomal protein S21 [Pseudomonas aeruginosa PAO1]	-0.441316	0.32482	0.590377
9947237	Probable transmembrane sensor	PA1301						PA1301	probable transmembrane sensor [Pseudomonas aeruginosa PAO1]	-0.441321	0.210095	0.490156
9947542	Uncharacterized protein PA1579	PA1579						PA1579	hypothetical protein PA1579 [Pseudomonas aeruginosa PAO1]	-0.442306	0.0532722	0.271654
9945910	Protein hcp1	hcp1	PA0085					PA0085	Hcp1 [Pseudomonas aeruginosa PAO1]	-0.443141	0.0736461	0.31639
9949386	Peptidyl-prolyl cis-trans isomerase (EC 5.2.1.8)	PA3262						PA3262	probable peptidyl-prolyl cis-trans isomerase, FkbP-type [Pseudomonas aeruginosa PAO1]	-0.443199	0.205636	0.484652
9946006	Chemotaxis response regulator protein-glutamate methylesterase of group 2 operon (EC 3.1.1.61)	cheB2	PA0173					PA0173	probable methylesterase [Pseudomonas aeruginosa PAO1]	-0.443304	0.302789	0.568271
9950761	Ornithine decarboxylase	speC	PA4519					PA4519	ornithine decarboxylase [Pseudomonas aeruginosa PAO1]	-0.443521	0.020562	0.198563
9947946	Ribose operon repressor RbsR	rbsR	PA1949					PA1949	ribose operon repressor RbsR [Pseudomonas aeruginosa PAO1]	-0.444119	0.0914165	0.34812
9948877	Pseudaminidase	PA2794						PA2794	pseudaminidase [Pseudomonas aeruginosa PAO1]	-0.444891	0.439851	0.681139
9951332	Type 4 fimbrial biogenesis protein PilO	pilO	PA5042					PA5042	type 4 fimbrial biogenesis protein PilO [Pseudomonas aeruginosa PAO1]	-0.445693	0.0448247	0.252799
9950686	Uncharacterized protein	PA4451						PA4451	conserved hypothetical protein [Pseudomonas aeruginosa PAO1]	-0.445971	0.46047	0.697986
9947343	Probable two-component response regulator	PA1397						PA1397	probable two-component response regulator [Pseudomonas aeruginosa PAO1]	-0.447533	0.0432059	0.248198
9951033	Probable transcriptional regulator	PA4769						PA4769	probable transcriptional regulator [Pseudomonas aeruginosa PAO1]	-0.44792	0.264182	0.538662
9947519	Uncharacterized protein	PA1558						PA1558	hypothetical protein PA1558 [Pseudomonas aeruginosa PAO1]	-0.448238	0.108034	0.372905
9951215	23S rRNA (guanosine-2'-O-)-methyltransferase RlmB (EC 2.1.1.185) (23S rRNA (guanosine2251 2'-O)-methyltransferase) (23S rRNA Gm2251 2'-O-methyltransferase)	rlmB	PA4936					PA4936	probable rRNA methylase [Pseudomonas aeruginosa PAO1]	-0.448575	0.150957	0.430447
9951572	Positive alginate biosynthesis regulatory protein	algR	PA5261					PA5261	alginate biosynthesis regulatory protein AlgR [Pseudomonas aeruginosa PAO1]	-0.450167	0.095931	0.353112
9950916	Lipid A deacylase PagL (EC 3.1.1.77) (LPS 3-O-deacylase PagL) (Outer membrane enzyme PagL) (PhoP/PhoQ-activated gene product L)	pagL	PA4661					PA4661	Lipid A 3-O-deacylase [Pseudomonas aeruginosa PAO1]	-0.450394	0.156393	0.433414
9949391	Major cold shock protein CspA	cspA	PA3266					PA3266	cold acclimation protein B [Pseudomonas aeruginosa PAO1]	-0.450649	0.797109	0.905394
9950160	AMP nucleosidase (EC 3.2.2.4)	amn	PA3970					PA3970	AMP nucleosidase [Pseudomonas aeruginosa PAO1]	-0.450735	0.0293457	0.223501
9946915	Putative beta-barrel assembly-enhancing protease (EC 3.4.-.-)	PA1005						PA1005	conserved hypothetical protein [Pseudomonas aeruginosa PAO1]	-0.451098	0.0629834	0.293881
9949859	Uncharacterized protein	PA3694						PA3694	hypothetical protein PA3694 [Pseudomonas aeruginosa PAO1]	-0.45132	0.10743	0.371678
9949066	Malonyl CoA-acyl carrier protein transacylase (EC 2.3.1.39)	fabD	PA2968					PA2968	malonyl-CoA-[acyl-carrier-protein] transacylase [Pseudomonas aeruginosa PAO1]	-0.45196	0.0234868	0.209975
9947266	Serine protease (EC 3.4.21.-)	PA1327						PA1327	probable protease [Pseudomonas aeruginosa PAO1]	-0.454534	0.23241	0.509963
9946684	Uncharacterized protein	PA0793						PA0793	hypothetical protein PA0793 [Pseudomonas aeruginosa PAO1]	-0.45471	0.824047	0.919607
9950689	Uncharacterized protein	PA4454						PA4454	conserved hypothetical protein [Pseudomonas aeruginosa PAO1]	-0.454956	0.0183053	0.193769
9946979	Uncharacterized protein	PA1064						PA1064	hypothetical protein PA1064 [Pseudomonas aeruginosa PAO1]	-0.456362	0.0470594	0.256599
9948462	Probable transcriptional regulator	PA2417						PA2417	probable transcriptional regulator [Pseudomonas aeruginosa PAO1]	-0.456571	0.108622	0.374389
9951845	Uncharacterized protein	PA5509						PA5509	hypothetical protein PA5509 [Pseudomonas aeruginosa PAO1]	-0.457428	0.0399671	0.245735
9947736	Para-aminobenzoate synthase component I	pabB	PA1758					PA1758	para-aminobenzoate synthase component I [Pseudomonas aeruginosa PAO1]	-0.458063	0.117686	0.386449
15597147	Uncharacterized protein	PA1951						PA1951	hypothetical protein PA1951 [Pseudomonas aeruginosa PAO1]	-0.459424	0.971588	0.988003
9946817	Uncharacterized protein	PA0915						PA0915	conserved hypothetical protein [Pseudomonas aeruginosa PAO1]	-0.461318	0.0251855	0.212367
9948024	Probable transcriptional regulator	PA2020						PA2020	probable transcriptional regulator [Pseudomonas aeruginosa PAO1]	-0.461456	0.0906105	0.347291
9947426	Uncharacterized protein	PA1473						PA1473	hypothetical protein PA1473 [Pseudomonas aeruginosa PAO1]	-0.461469	0.197978	0.475911
9949974	Uncharacterized protein	PA3801						PA3801	conserved hypothetical protein [Pseudomonas aeruginosa PAO1]	-0.46157	0.106689	0.370431
9945862	Probable hemagglutinin	PA0041						PA0041	probable hemagglutinin [Pseudomonas aeruginosa PAO1]	-0.462517	0.491774	0.717728
9946012	Probable two-component response regulator	PA0179						PA0179	probable two-component response regulator [Pseudomonas aeruginosa PAO1]	-0.462806	0.557804	0.761181
9949969	Uncharacterized protein	PA3796						PA3796	hypothetical protein PA3796 [Pseudomonas aeruginosa PAO1]	-0.463148	0.2001	0.478145
9947512	Cbb3-type cytochrome c oxidase subunit	ccoP1	PA1552					PA1552	Cytochrome c oxidase, cbb3-type, CcoP subunit [Pseudomonas aeruginosa PAO1]	-0.464048	0.0621817	0.292452
9946432	Uncharacterized protein	PA0563						PA0563	conserved hypothetical protein [Pseudomonas aeruginosa PAO1]	-0.464722	0.93831	0.968247
9946934	Probable short-chain dehydrogenase	PA1023						PA1023	probable short-chain dehydrogenase [Pseudomonas aeruginosa PAO1]	-0.464988	0.339929	0.603412
9947133	Uncharacterized protein	PA1206						PA1206	hypothetical protein PA1206 [Pseudomonas aeruginosa PAO1]	-0.465486	0.888762	0.944578
9951847	MifR	mifR	PA5511					PA5511	MifR [Pseudomonas aeruginosa PAO1]	-0.465745	0.186605	0.465231
9949997	Queuine tRNA-ribosyltransferase (EC 2.4.2.29) (Guanine insertion enzyme) (tRNA-guanine transglycosylase)	tgt	PA3823					PA3823	queuine tRNA-ribosyltransferase [Pseudomonas aeruginosa PAO1]	-0.465924	0.547149	0.755778
9949346	Probable transcriptional regulator	PA3225						PA3225	probable transcriptional regulator [Pseudomonas aeruginosa PAO1]	-0.466591	0.195878	0.474406
9948496	Uncharacterized protein	PA2448						PA2448	hypothetical protein PA2448 [Pseudomonas aeruginosa PAO1]	-0.467364	0.0606426	0.29101
9948995	Precorrin-3 methylase CobJ	cobJ	PA2903					PA2903	precorrin-3 methylase CobJ [Pseudomonas aeruginosa PAO1]	-0.467554	0.381038	0.636775
9947689	ExsD	exsD	PA1714					PA1714	ExsD [Pseudomonas aeruginosa PAO1]	-0.467832	0.149286	0.427641
9950290	Uncharacterized protein	PA4090						PA4090	hypothetical protein PA4090 [Pseudomonas aeruginosa PAO1]	-0.468129	0.126276	0.40242
9947722	Uncharacterized protein	PA1745						PA1745	hypothetical protein PA1745 [Pseudomonas aeruginosa PAO1]	-0.468662	0.0365463	0.241022
9951218	Adenylosuccinate synthetase (AMPSase) (AdSS) (EC 6.3.4.4) (IMP--aspartate ligase)	purA	PA4938					PA4938	adenylosuccinate synthetase [Pseudomonas aeruginosa PAO1]	-0.469234	0.195186	0.473622
9950538	Formyltetrahydrofolate deformylase (EC 3.5.1.10) (Formyl-FH(4) hydrolase)	purU1	purU	PA4314				PA4314	formyltetrahydrofolate deformylase [Pseudomonas aeruginosa PAO1]	-0.469288	0.0636556	0.294673
9950920	Peptide chain release factor 1 (RF-1)	prfA	prf1	PA4665				PA4665	peptide chain release factor 1 [Pseudomonas aeruginosa PAO1]	-0.469377	0.0710958	0.311423
9951096	Arylamine N-acetyltransferase	PA4827						PA4827	arylamine N-acetyltransferase [Pseudomonas aeruginosa PAO1]	-0.469578	0.0207135	0.198799
9948801	Probable chaperone	PA2725						PA2725	probable chaperone [Pseudomonas aeruginosa PAO1]	-0.470539	0.57055	0.76756
9951647	Uncharacterized protein	PA5329						PA5329	conserved hypothetical protein [Pseudomonas aeruginosa PAO1]	-0.471256	0.636436	0.809358
9949099	Na(+)-translocating NADH-quinone reductase subunit A (Na(+)-NQR subunit A) (Na(+)-translocating NQR subunit A) (EC 1.6.5.8) (NQR complex subunit A) (NQR-1 subunit A)	nqrA	PA2999					PA2999	Na+-translocating NADH:ubiquinone oxidoreductase subunit Nrq1 [Pseudomonas aeruginosa PAO1]	-0.473109	0.124258	0.398606
9949412	Beta-ketodecanoyl-[acyl-carrier-protein] synthase (EC 2.3.1.207)	PA3286						PA3286	hypothetical protein PA3286 [Pseudomonas aeruginosa PAO1]	-0.473528	0.213353	0.492087
9948888	Uncharacterized protein	PA2805						PA2805	hypothetical protein PA2805 [Pseudomonas aeruginosa PAO1]	-0.47829	0.0641091	0.294673
9949333	Uncharacterized protein	PA3213						PA3213	hypothetical protein PA3213 [Pseudomonas aeruginosa PAO1]	-0.478467	0.120216	0.390134
9946255	Dihydroorotase-like protein (Aspartate carbamoyltransferase 44 kDa non-catalytic chain)	pyrC'	pyrX	PA0401				PA0401	noncatalytic dihydroorotase-like protein [Pseudomonas aeruginosa PAO1]	-0.478581	0.79686	0.905394
9951555	Uncharacterized protein	PA5245						PA5245	conserved hypothetical protein [Pseudomonas aeruginosa PAO1]	-0.48015	0.0693212	0.307068
9950493	50S ribosomal protein L11	rplK	PA4274					PA4274	50S ribosomal protein L11 [Pseudomonas aeruginosa PAO1]	-0.480157	0.0527929	0.27165
9949468	Probable major facilitator superfamily (MFS) transporter	PA3336						PA3336	probable major facilitator superfamily (MFS) transporter [Pseudomonas aeruginosa PAO1]	-0.480272	0.180568	0.460887
9949155	Ribosome modulation factor (RMF)	rmf	PA3049					PA3049	ribosome modulation factor [Pseudomonas aeruginosa PAO1]	-0.480442	0.046031	0.255339
9946688	2-methylisocitrate lyase (2-MIC) (MICL) (EC 4.1.3.30) ((2R,3S)-2-methylisocitrate lyase)	prpB	PA0796					PA0796	carboxyphosphonoenolpyruvate phosphonomutase [Pseudomonas aeruginosa PAO1]	-0.48111	0.0345774	0.237592
9947941	Uncharacterized protein	PA1944						PA1944	hypothetical protein PA1944 [Pseudomonas aeruginosa PAO1]	-0.481146	0.0203885	0.198563
9950188	Lipoyl synthase (EC 2.8.1.8) (Lip-syn) (LS) (Lipoate synthase) (Lipoic acid synthase) (Sulfur insertion protein LipA)	lipA	PA3996					PA3996	lipoate synthase [Pseudomonas aeruginosa PAO1]	-0.481714	0.168256	0.44535
9949081	Uncharacterized protein	PA2982						PA2982	conserved hypothetical protein [Pseudomonas aeruginosa PAO1]	-0.481835	0.189869	0.469285
9951341	Primosomal protein N' (EC 3.6.4.-) (ATP-dependent helicase PriA)	priA	PA5050					PA5050	primosomal protein N' [Pseudomonas aeruginosa PAO1]	-0.482906	0.0295773	0.224351
9949557	Leucine dehydrogenase	ldh	PA3418					PA3418	leucine dehydrogenase [Pseudomonas aeruginosa PAO1]	-0.484936	0.0737038	0.31639
9951510	Amino-acid acetyltransferase (EC 2.3.1.1) (N-acetylglutamate synthase) (AGS) (NAGS)	argA	PA5204					PA5204	N-acetylglutamate synthase [Pseudomonas aeruginosa PAO1]	-0.485598	0.0155485	0.178259
9948449	Uncharacterized protein	PA2405						PA2405	hypothetical protein PA2405 [Pseudomonas aeruginosa PAO1]	-0.485709	0.186405	0.465231
9949088	Uncharacterized protein	PA2988						PA2988	conserved hypothetical protein [Pseudomonas aeruginosa PAO1]	-0.48675	0.0546068	0.275255
9949189	Uncharacterized protein	PA3081						PA3081	conserved hypothetical protein [Pseudomonas aeruginosa PAO1]	-0.487319	0.0211109	0.199786
9951019	Carbamoyl-phosphate synthase large chain (EC 6.3.5.5) (Carbamoyl-phosphate synthetase ammonia chain)	carB	PA4756					PA4756	carbamoylphosphate synthetase large subunit [Pseudomonas aeruginosa PAO1]	-0.488948	0.0558923	0.27743
9951198	NH(3)-dependent NAD(+) synthetase (EC 6.3.1.5)	nadE	PA4920					PA4920	NH3-dependent NAD synthetase [Pseudomonas aeruginosa PAO1]	-0.489587	0.214114	0.492912
9948754	Uncharacterized protein	PA2682						PA2682	conserved hypothetical protein [Pseudomonas aeruginosa PAO1]	-0.489818	0.27681	0.55147
9947134	Glutathione-regulated potassium-efflux system protein KefB	kefB	PA1207					PA1207	glutathione-regulated potassium-efflux system protein KefB [Pseudomonas aeruginosa PAO1]	-0.489972	0.104906	0.369158
9945894	Uncharacterized protein	PA0070						PA0070	hypothetical protein PA0070 [Pseudomonas aeruginosa PAO1]	-0.490308	0.190276	0.469285
9947924	Uncharacterized protein	PA1929						PA1929	hypothetical protein PA1929 [Pseudomonas aeruginosa PAO1]	-0.490415	0.659311	0.82318
9950594	Superoxide dismutase [Fe] (EC 1.15.1.1)	sodB	PA4366					PA4366	superoxide dismutase [Pseudomonas aeruginosa PAO1]	-0.491912	0.771495	0.893226
9950664	Ubiquinol-cytochrome c reductase iron-sulfur subunit (EC 1.10.2.2)	PA4431						PA4431	probable iron-sulfur protein [Pseudomonas aeruginosa PAO1]	-0.492997	0.639337	0.810674
9950469	50S ribosomal protein L24	rplX	PA4252					PA4252	50S ribosomal protein L24 [Pseudomonas aeruginosa PAO1]	-0.494559	0.0921379	0.349177
9946147	Polyamine-transporting ATPase (EC 3.6.3.31)	spuF	PA0302					PA0302	polyamine transport protein PotG [Pseudomonas aeruginosa PAO1]	-0.494808	0.778478	0.896993
9951473	Arginine/ornithine antiporter	arcD	PA5170					PA5170	arginine/ornithine antiporter [Pseudomonas aeruginosa PAO1]	-0.494984	0.598917	0.785139
9947493	Recombination protein RecR	recR	PA1534					PA1534	recombination protein RecR [Pseudomonas aeruginosa PAO1]	-0.49526	0.357388	0.615429
9948597	Uncharacterized protein	PA2540						PA2540	conserved hypothetical protein [Pseudomonas aeruginosa PAO1]	-0.497076	0.0579418	0.284409
9946146	Spermidine-binding periplasmic protein SpuE	spuE	PA0301					PA0301	polyamine transport protein [Pseudomonas aeruginosa PAO1]	-0.497745	0.0516195	0.27023
9947755	Conserved cytoplasmic membrane protein, CmpX protein	cmpX	PA1775					PA1775	conserved cytoplasmic membrane protein, CmpX protein [Pseudomonas aeruginosa PAO1]	-0.49866	0.130699	0.406482
9945903	Uncharacterized protein	PA0078						PA0078	hypothetical protein PA0078 [Pseudomonas aeruginosa PAO1]	-0.498818	0.078985	0.32624
15599829	Probable chemotaxis transducer	PA4633						PA4633	chemotaxis transducer [Pseudomonas aeruginosa PAO1]	-0.501703	0.0550141	0.276194
9947103	PhoP/Q and low Mg2+ inducible outer membrane protein H1	oprH	PA1178					PA1178	PhoP/Q and low Mg2+ inducible outer membrane protein H1 precursor [Pseudomonas aeruginosa PAO1]	-0.502351	0.701807	0.850918
9950108	Uncharacterized protein	PA3923						PA3923	hypothetical protein PA3923 [Pseudomonas aeruginosa PAO1]	-0.50367	0.0413228	0.247303
9951549	Thioredoxin (Trx)	trxA	trx	PA5240				PA5240	thioredoxin [Pseudomonas aeruginosa PAO1]	-0.503947	0.0304321	0.227374
9949286	Methylthioribose-1-phosphate isomerase (M1Pi) (MTR-1-P isomerase) (EC 5.3.1.23) (S-methyl-5-thioribose-1-phosphate isomerase)	mtnA	PA3169					PA3169	5-methylthioribose-1-phosphate isomerase MtnA [Pseudomonas aeruginosa PAO1]	-0.50408	0.172196	0.451728
9946161	Uncharacterized protein	PA0315						PA0315	hypothetical protein PA0315 [Pseudomonas aeruginosa PAO1]	-0.504292	0.134358	0.409445
9946632	Probable acyl-CoA dehydrogenase	PA0746						PA0746	probable acyl-CoA dehydrogenase [Pseudomonas aeruginosa PAO1]	-0.504586	0.180891	0.460975
9946984	Uncharacterized protein	PA1069						PA1069	hypothetical protein PA1069 [Pseudomonas aeruginosa PAO1]	-0.505572	0.0204554	0.198563
9949578	GTP cyclohydrolase 1 1 (EC 3.5.4.16) (GTP cyclohydrolase I 1) (GTP-CH-I 1)	folE1	PA3438					PA3438	GTP cyclohydrolase I precursor [Pseudomonas aeruginosa PAO1]	-0.505605	0.0337013	0.236109
9949975	Histidine--tRNA ligase (EC 6.1.1.21) (Histidyl-tRNA synthetase) (HisRS)	hisS	PA3802					PA3802	histidyl-tRNA synthetase [Pseudomonas aeruginosa PAO1]	-0.507402	0.0201918	0.198563
9947129	Probable hydrolase	PA1202						PA1202	probable hydrolase [Pseudomonas aeruginosa PAO1]	-0.507476	0.0128309	0.166825
15597267	Elongation factor G 2 (EF-G 2)	fusB	fusA2	PA2071				PA2071	elongation factor G [Pseudomonas aeruginosa PAO1]	-0.507514	0.0381262	0.243258
9949552	Uncharacterized protein	PA3414						PA3414	hypothetical protein PA3414 [Pseudomonas aeruginosa PAO1]	-0.510357	0.473778	0.707307
9951317	Uncharacterized protein	PA5028						PA5028	conserved hypothetical protein [Pseudomonas aeruginosa PAO1]	-0.510621	0.238484	0.514079
9951563	Transcriptional regulatory protein AlgP (Alginate regulatory protein AlgR3)	algP	algR3	PA5253				PA5253	alginate regulatory protein AlgP [Pseudomonas aeruginosa PAO1]	-0.510826	0.0344143	0.237592
9951222	Protease subunit HflK	hflK	PA4942					PA4942	protease subunit HflK [Pseudomonas aeruginosa PAO1]	-0.511201	0.438277	0.679887
9950196	Ribosomal RNA large subunit methyltransferase H (EC 2.1.1.177) (23S rRNA (pseudouridine1915-N3)-methyltransferase) (23S rRNA m3Psi1915 methyltransferase) (rRNA (pseudouridine-N3-)-methyltransferase RlmH)	rlmH	PA4004					PA4004	conserved hypothetical protein [Pseudomonas aeruginosa PAO1]	-0.511482	0.125175	0.400285
9947904	Sigma factor regulator, FemR	femR	PA1911					PA1911	sigma factor regulator, FemR [Pseudomonas aeruginosa PAO1]	-0.511505	0.0209935	0.199786
9946139	Probable periplasmic polyamine binding protein	PA0295						PA0295	probable periplasmic polyamine binding protein [Pseudomonas aeruginosa PAO1]	-0.51422	0.143826	0.420235
9946840	Uncharacterized protein	PA0935						PA0935	conserved hypothetical protein [Pseudomonas aeruginosa PAO1]	-0.514601	0.0247007	0.210536
9951469	C4-dicarboxylate-binding periplasmic protein DctP	dctP	PA5167					PA5167	probable c4-dicarboxylate-binding protein [Pseudomonas aeruginosa PAO1]	-0.514728	0.975529	0.990208
9951568	Uncharacterized protein	PA5257						PA5257	hypothetical protein PA5257 [Pseudomonas aeruginosa PAO1]	-0.514878	0.411563	0.659837
9947684	Exoenzyme S synthesis protein C	exsC	PA1710					PA1710	ExsC, exoenzyme S synthesis protein C precursor [Pseudomonas aeruginosa PAO1]	-0.516301	0.18001	0.460887
9951350	Poly(3-hydroxyalkanoic acid) synthase 2	phaC2	PA5058					PA5058	poly(3-hydroxyalkanoic acid) synthase 2 [Pseudomonas aeruginosa PAO1]	-0.517444	0.0376941	0.242862
9950240	1-deoxy-D-xylulose-5-phosphate synthase (EC 2.2.1.7) (1-deoxyxylulose-5-phosphate synthase) (DXP synthase) (DXPS)	dxs	PA4044					PA4044	1-deoxyxylulose-5-phosphate synthase [Pseudomonas aeruginosa PAO1]	-0.517906	0.183597	0.462617
9948476	Uncharacterized protein	PA2430						PA2430	conserved hypothetical protein [Pseudomonas aeruginosa PAO1]	-0.519747	0.0770557	0.323716
9946751	Fumarate hydratase class II 2 (Fumarase C 2) (EC 4.2.1.2)	fumC2	PA0854					PA0854	fumarate hydratase [Pseudomonas aeruginosa PAO1]	-0.521398	0.0611717	0.291771
9948276	Dihydrolipoyl dehydrogenase (EC 1.8.1.4) (Dihydrolipoamide dehydrogenase) (E3 component of branched-chain alpha-keto acid dehydrogenase complex) (LPD-Val)	lpdV	PA2250					PA2250	lipoamide dehydrogenase-Val [Pseudomonas aeruginosa PAO1]	-0.522519	0.0196299	0.197711
9946685	Probable aconitate hydratase	PA0794						PA0794	probable aconitate hydratase [Pseudomonas aeruginosa PAO1]	-0.522874	0.0296475	0.224351
9945954	Uncharacterized protein	PA0126						PA0126	hypothetical protein PA0126 [Pseudomonas aeruginosa PAO1]	-0.523702	0.0172722	0.187925
9945950	Uncharacterized protein	PA0122						PA0122	conserved hypothetical protein [Pseudomonas aeruginosa PAO1]	-0.524659	0.15124	0.430732
9947862	Uncharacterized protein	PA1872						PA1872	hypothetical protein PA1872 [Pseudomonas aeruginosa PAO1]	-0.524751	0.0619989	0.292452
9946315	RNA helicase DbpA	dbpA	PA0455					PA0455	RNA helicase DbpA [Pseudomonas aeruginosa PAO1]	-0.525096	0.0286283	0.220144
9949261	Probable glycosyl transferase WbpJ	wbpJ	PA3147					PA3147	probable glycosyl transferase WbpJ [Pseudomonas aeruginosa PAO1]	-0.526988	0.479881	0.711088
9948681	DNA translocase FtsK	ftsK	PA2615					PA2615	cell division protein FtsK [Pseudomonas aeruginosa PAO1]	-0.527159	0.20814	0.488002
9949811	1-deoxy-D-xylulose 5-phosphate reductoisomerase (DXP reductoisomerase) (EC 1.1.1.267) (1-deoxyxylulose-5-phosphate reductoisomerase) (2-C-methyl-D-erythritol 4-phosphate synthase)	dxr	PA3650					PA3650	1-deoxy-d-xylulose 5-phosphate reductoisomerase [Pseudomonas aeruginosa PAO1]	-0.527788	0.014329	0.174385
9946631	Probable enoyl-CoA hydratase/isomerase	PA0745						PA0745	probable enoyl-CoA hydratase/isomerase [Pseudomonas aeruginosa PAO1]	-0.52864	0.0402301	0.24671
9946241	Uncharacterized protein	PA0388						PA0388	hypothetical protein PA0388 [Pseudomonas aeruginosa PAO1]	-0.528852	0.134401	0.409445
9951666	Uncharacterized protein	PA5346						PA5346	hypothetical protein PA5346 [Pseudomonas aeruginosa PAO1]	-0.528925	0.302717	0.568271
9947181	Proteinase inhibitor (Aprin)	inh	aprI	PA1250				PA1250	alkaline proteinase inhibitor AprI [Pseudomonas aeruginosa PAO1]	-0.529095	0.0246375	0.210536
9946831	D-lactate dehydrogenase (Fermentative)	ldhA	PA0927					PA0927	D-lactate dehydrogenase (fermentative) [Pseudomonas aeruginosa PAO1]	-0.529433	0.275808	0.551382
9946275	Ribosomal RNA small subunit methyltransferase E (EC 2.1.1.193)	PA0419						PA0419	conserved hypothetical protein [Pseudomonas aeruginosa PAO1]	-0.532313	0.323392	0.588975
9950078	Probable 2-hydroxyacid dehydrogenase	PA3896						PA3896	probable 2-hydroxyacid dehydrogenase [Pseudomonas aeruginosa PAO1]	-0.533396	0.148787	0.427641
9946855	NAD(P)H dehydrogenase (quinone) (EC 1.6.5.2) (Flavoprotein WrbA) (NAD(P)H:quinone oxidoreductase) (NQO)	PA0949						PA0949	Trp repressor binding protein WrbA [Pseudomonas aeruginosa PAO1]	-0.534697	0.151853	0.431404
9946364	Biotin synthase (EC 2.8.1.6)	bioB	PA0500					PA0500	biotin synthase [Pseudomonas aeruginosa PAO1]	-0.536451	0.142202	0.418106
9951368	Probable permease of ABC transporter	PA5075						PA5075	probable permease of ABC transporter [Pseudomonas aeruginosa PAO1]	-0.538538	0.526001	0.739219
9951677	Probable chorismate pyruvate-lyase (CL) (CPL) (EC 4.1.3.40)	ubiC	PA5357					PA5357	hypothetical protein PA5357 [Pseudomonas aeruginosa PAO1]	-0.538558	0.194867	0.473335
9947315	Uncharacterized protein	PA1372						PA1372	hypothetical protein PA1372 [Pseudomonas aeruginosa PAO1]	-0.539788	0.0103105	0.154611
9951570	Uroporphyrinogen-III synthase (UROS) (EC 4.2.1.75) (Hydroxymethylbilane hydrolyase [cyclizing]) (Uroporphyrinogen-III cosynthase)	hemD	PA5259					PA5259	uroporphyrinogen-III synthetase [Pseudomonas aeruginosa PAO1]	-0.541729	0.0656054	0.299024
9948883	Uncharacterized protein	PA2800						PA2800	conserved hypothetical protein [Pseudomonas aeruginosa PAO1]	-0.54265	0.0781334	0.325924
9947055	Protein deglycase HchA (EC 3.1.2.-) (EC 3.5.1.-)	hchA	PA1135					PA1135	conserved hypothetical protein [Pseudomonas aeruginosa PAO1]	-0.543675	0.0310116	0.228808
9951827	Probable GTP-binding protein EngB	engB	PA5492					PA5492	conserved hypothetical protein [Pseudomonas aeruginosa PAO1]	-0.544668	0.0275958	0.217508
9947581	Probable lipase	PA1615						PA1615	probable lipase [Pseudomonas aeruginosa PAO1]	-0.545729	0.249797	0.521459
9948493	Glycine dehydrogenase (decarboxylating) 1 (EC 1.4.4.2) (Glycine cleavage system P-protein 1) (Glycine decarboxylase 1) (Glycine dehydrogenase (aminomethyl-transferring) 1)	gcvP1	PA2445					PA2445	glycine cleavage system protein P2 [Pseudomonas aeruginosa PAO1]	-0.547226	0.0113274	0.161109
9951052	Probable short-chain dehydrogenase	PA4786						PA4786	probable short-chain dehydrogenase [Pseudomonas aeruginosa PAO1]	-0.547269	0.0261735	0.214393
9946179	L-threonine dehydratase (EC 4.3.1.19) (Threonine deaminase)	ilvA1	ilvA	PA0331				PA0331	threonine dehydratase, biosynthetic [Pseudomonas aeruginosa PAO1]	-0.548505	0.259812	0.533405
9951277	Uncharacterized protein	PA4992						PA4992	hypothetical protein PA4992 [Pseudomonas aeruginosa PAO1]	-0.549315	0.0410523	0.247303
9948333	Uncharacterized protein	PA2301						PA2301	hypothetical protein PA2301 [Pseudomonas aeruginosa PAO1]	-0.551094	0.0101035	0.153899
9950773	DNA gyrase inhibitor YacG	yacG	PA4530					PA4530	conserved hypothetical protein [Pseudomonas aeruginosa PAO1]	-0.552448	0.427343	0.672406
9949534	Ferredoxin--NADP+ reductase	fpr	PA3397					PA3397	ferredoxin--NADP+ reductase [Pseudomonas aeruginosa PAO1]	-0.552611	0.0324969	0.2325
9947205	Probable tonB-dependent receptor	PA1271						PA1271	probable tonB-dependent receptor [Pseudomonas aeruginosa PAO1]	-0.55302	0.0532327	0.271654
9950631	Probable pyrophosphohydrolase	PA4400						PA4400	probable pyrophosphohydrolase [Pseudomonas aeruginosa PAO1]	-0.553238	0.0157708	0.178259
9947719	Probable amidotransferase	PA1742						PA1742	probable amidotransferase [Pseudomonas aeruginosa PAO1]	-0.553619	0.0722604	0.312914
9951018	Transcription elongation factor GreA (Transcript cleavage factor GreA)	greA	PA4755					PA4755	transcription elongation factor GreA [Pseudomonas aeruginosa PAO1]	-0.553953	0.0225059	0.205956
9948673	Sulfurtransferase (EC 2.8.1.-)	PA2608						PA2608	conserved hypothetical protein [Pseudomonas aeruginosa PAO1]	-0.554086	0.0181083	0.193455
9949279	Cytidylate kinase (CK) (EC 2.7.4.25) (Cytidine monophosphate kinase) (CMP kinase)	cmk	PA3163					PA3163	cytidylate kinase [Pseudomonas aeruginosa PAO1]	-0.554488	0.156839	0.433414
9947811	Uncharacterized protein	PA1825						PA1825	hypothetical protein PA1825 [Pseudomonas aeruginosa PAO1]	-0.554737	0.158041	0.43489
9949984	Chaperone protein HscA homolog	hscA	PA3810					PA3810	heat shock protein HscA [Pseudomonas aeruginosa PAO1]	-0.554898	0.112667	0.380552
9948497	Probable transcriptional regulator	PA2449						PA2449	probable transcriptional regulator [Pseudomonas aeruginosa PAO1]	-0.555636	0.2422	0.516096
9946531	S-adenosylmethionine decarboxylase proenzyme (AdoMetDC) (SAMDC) (EC 4.1.1.50) [Cleaved into: S-adenosylmethionine decarboxylase beta chain; S-adenosylmethionine decarboxylase alpha chain]	speD	PA0654					PA0654	S-adenosylmethionine decarboxylase proenzyme [Pseudomonas aeruginosa PAO1]	-0.559752	0.0379077	0.242862
9949973	Outer membrane protein assembly factor BamB	bamB	PA3800					PA3800	conserved hypothetical protein [Pseudomonas aeruginosa PAO1]	-0.560236	0.190983	0.469285
9951906	tRNA uridine 5-carboxymethylaminomethyl modification enzyme MnmG (Glucose-inhibited division protein A)	mnmG	gidA	PA5565				PA5565	glucose-inhibited division protein A [Pseudomonas aeruginosa PAO1]	-0.560336	0.603715	0.788736
9950630	Uncharacterized protein	PA4399						PA4399	conserved hypothetical protein [Pseudomonas aeruginosa PAO1]	-0.560975	0.0241565	0.210536
9951463	dTDP-glucose 4,6-dehydratase (EC 4.2.1.46)	rmlB	PA5161					PA5161	dTDP-D-glucose 4,6-dehydratase [Pseudomonas aeruginosa PAO1]	-0.562996	0.0709376	0.311308
9947790	Enoyl-[acyl-carrier-protein] reductase [NADH] FabI (ENR) (EC 1.3.1.9) (NADH-dependent enoyl-ACP reductase)	fabI	PA1806					PA1806	NADH-dependent enoyl-ACP reductase [Pseudomonas aeruginosa PAO1]	-0.5642	0.0890179	0.345757
9950555	Probable enoyl-CoA hydratase/isomerase	PA4330						PA4330	probable enoyl-CoA hydratase/isomerase [Pseudomonas aeruginosa PAO1]	-0.56483	0.0415569	0.247303
9950910	Uncharacterized protein	PA4656						PA4656	conserved hypothetical protein [Pseudomonas aeruginosa PAO1]	-0.565202	0.0284025	0.219496
9947369	Guanidinobutyrase (EC 3.5.3.7)	gbuA	PA1421					PA1421	guanidinobutyrase [Pseudomonas aeruginosa PAO1]	-0.565279	0.441633	0.682393
9949109	LexA repressor (EC 3.4.21.88)	lexA	PA3007					PA3007	repressor protein LexA [Pseudomonas aeruginosa PAO1]	-0.565882	0.145047	0.420235
9947238	Probable heme utilization protein	PA1302						PA1302	probable heme utilization protein precursor [Pseudomonas aeruginosa PAO1]	-0.566248	0.1402	0.414822
9947649	Uncharacterized protein	PA1677						PA1677	conserved hypothetical protein [Pseudomonas aeruginosa PAO1]	-0.566593	0.115239	0.382775
9948705	NADH-quinone oxidoreductase subunit A 2 (EC 1.6.5.11) (NADH dehydrogenase I subunit A 2) (NDH-1 subunit A 2) (NUO1 2)	nuoA2	PA2637					PA2637	NADH dehydrogenase I chain A [Pseudomonas aeruginosa PAO1]	-0.566691	0.045154	0.253442
9947907	Uncharacterized protein	PA1914						PA1914	conserved hypothetical protein [Pseudomonas aeruginosa PAO1]	-0.567595	0.0126065	0.166825
9950539	MvaT (Transcriptional regulator MvaT, P16 subunit)	mvaT	PA4315					PA4315	transcriptional regulator MvaT, P16 subunit [Pseudomonas aeruginosa PAO1]	-0.568624	0.496824	0.721846
9950193	Soluble lytic transglycosylase B	sltB1	PA4001					PA4001	soluble lytic transglycosylase B [Pseudomonas aeruginosa PAO1]	-0.569999	0.00980779	0.152841
9946686	Citrate synthase	prpC	PA0795					PA0795	citrate synthase 2 [Pseudomonas aeruginosa PAO1]	-0.570179	0.00843713	0.140567
9950486	30S ribosomal protein S12	rpsL	PA4268					PA4268	30S ribosomal protein S12 [Pseudomonas aeruginosa PAO1]	-0.571238	0.0723639	0.312914
9950703	Uncharacterized protein	PA4467						PA4467	hypothetical protein PA4467 [Pseudomonas aeruginosa PAO1]	-0.572182	0.399078	0.651557
9945907	Uncharacterized protein	PA0082						PA0082	hypothetical protein PA0082 [Pseudomonas aeruginosa PAO1]	-0.572678	0.608477	0.789146
9946538	Uncharacterized protein	PA0660						PA0660	hypothetical protein PA0660 [Pseudomonas aeruginosa PAO1]	-0.573312	0.0154573	0.178259
9950889	Uncharacterized protein	PA4635						PA4635	conserved hypothetical protein [Pseudomonas aeruginosa PAO1]	-0.57344	0.0953443	0.352282
9947073	Pyocin-S2 immunity protein	imm2	PA1151					PA1151	pyocin S2 immunity protein [Pseudomonas aeruginosa PAO1]	-0.573761	0.034249	0.237592
9948439	Pyoverdine biosynthesis protein PvdE	pvdE	PA2397					PA2397	pyoverdine biosynthesis protein PvdE [Pseudomonas aeruginosa PAO1]	-0.575594	0.526634	0.739669
9950576	Uncharacterized protein	PA4349						PA4349	hypothetical protein PA4349 [Pseudomonas aeruginosa PAO1]	-0.575636	0.0162538	0.181883
9951152	Probable transcriptional regulator	PA4878						PA4878	probable transcriptional regulator [Pseudomonas aeruginosa PAO1]	-0.576125	0.519942	0.734639
9946674	Probable transcriptional regulator	PA0784						PA0784	probable transcriptional regulator [Pseudomonas aeruginosa PAO1]	-0.576649	0.0747906	0.318738
9948381	Uncharacterized protein	PA2345						PA2345	conserved hypothetical protein [Pseudomonas aeruginosa PAO1]	-0.577044	0.14409	0.420235
9950589	Probable oxidoreductase	PA4361						PA4361	probable oxidoreductase [Pseudomonas aeruginosa PAO1]	-0.577461	0.0250591	0.212059
9948707	NADH-quinone oxidoreductase subunit C/D (EC 1.6.5.11) (NADH dehydrogenase I subunit C/D) (NDH-1 subunit C/D)	nuoC	nuoCD	nuoD	PA2639			PA2639	NADH dehydrogenase I chain C,D [Pseudomonas aeruginosa PAO1]	-0.578628	0.0331833	0.23466
9947612	tRNA 2-selenouridine synthase (EC 2.9.1.-) (Selenophosphate-dependent tRNA 2-selenouridine synthase)	selU	PA1643					PA1643	conserved hypothetical protein [Pseudomonas aeruginosa PAO1]	-0.579224	0.176697	0.456935
9948869	Carboxypeptidase G2	cpg2	PA2787					PA2787	carboxypeptidase G2 precursor [Pseudomonas aeruginosa PAO1]	-0.579985	0.0575226	0.282939
9947730	2-dehydropantoate 2-reductase (EC 1.1.1.169) (Ketopantoate reductase)	PA1752						PA1752	hypothetical protein PA1752 [Pseudomonas aeruginosa PAO1]	-0.581432	0.0231367	0.207827
9951150	Osmotically inducible lipoprotein OsmE	osmE	PA4876					PA4876	osmotically inducible lipoprotein OsmE [Pseudomonas aeruginosa PAO1]	-0.581509	0.0360013	0.240791
110227056	PvdJ	pvdJ	PA2400					PA2400	PvdJ [Pseudomonas aeruginosa PAO1]	-0.58182	0.0683207	0.305754
15600492	Uncharacterized protein	PA5299						PA5299	hypothetical protein PA5299 [Pseudomonas aeruginosa PAO1]	-0.582585	0.0138118	0.170486
9951495	Probable nitroreductase	PA5190						PA5190	probable nitroreductase [Pseudomonas aeruginosa PAO1]	-0.582929	0.267652	0.543826
9949125	Uncharacterized protein	PA3022						PA3022	hypothetical protein PA3022 [Pseudomonas aeruginosa PAO1]	-0.58311	0.517567	0.733038
9950012	Uncharacterized protein	PA3836						PA3836	hypothetical protein PA3836 [Pseudomonas aeruginosa PAO1]	-0.583298	0.0931886	0.349791
9949982	Uncharacterized protein PA3808	PA3808						PA3808	conserved hypothetical protein [Pseudomonas aeruginosa PAO1]	-0.583879	0.0369414	0.241838
9951581	Uncharacterized protein	PA5269						PA5269	hypothetical protein PA5269 [Pseudomonas aeruginosa PAO1]	-0.584347	0.241686	0.515466
9948535	Uncharacterized protein	PA2483						PA2483	conserved hypothetical protein [Pseudomonas aeruginosa PAO1]	-0.584773	0.15599	0.433414
9948807	Uncharacterized protein	PA2730						PA2730	hypothetical protein PA2730 [Pseudomonas aeruginosa PAO1]	-0.585009	0.0467068	0.255339
9950932	Carbonic anhydrase (EC 4.2.1.1) (Carbonate dehydratase)	PA4676						PA4676	probable carbonic anhydrase [Pseudomonas aeruginosa PAO1]	-0.585264	0.132223	0.406482
9946269	Protein-glutamate methylesterase (EC 3.1.1.61)	chpB	PA0414					PA0414	probable methylesterase [Pseudomonas aeruginosa PAO1]	-0.585847	0.104049	0.367917
9948709	NADH-quinone oxidoreductase subunit F (EC 1.6.5.11) (NADH dehydrogenase I subunit F) (NDH-1 subunit F)	nuoF	PA2641					PA2641	NADH dehydrogenase I chain F [Pseudomonas aeruginosa PAO1]	-0.586861	0.0169245	0.186724
9949989	IscR	iscR	PA3815					PA3815	IscR [Pseudomonas aeruginosa PAO1]	-0.586887	0.389008	0.642271
9951618	Alanine racemase, catabolic (EC 5.1.1.1)	dadX	PA5302					PA5302	catabolic alanine racemase [Pseudomonas aeruginosa PAO1]	-0.587048	0.166687	0.44292
9949843	Ribosomal RNA small subunit methyltransferase J (EC 2.1.1.242) (16S rRNA m2G1516 methyltransferase) (rRNA (guanine-N(2)-)-methyltransferase)	rsmJ	PA3680					PA3680	conserved hypothetical protein [Pseudomonas aeruginosa PAO1]	-0.587406	0.912822	0.953624
9946145	Putrescine-binding periplasmic protein SpuD	spuD	PA0300					PA0300	polyamine transport protein [Pseudomonas aeruginosa PAO1]	-0.58786	0.0901672	0.346718
9946926	Probable transcriptional regulator	PA1015						PA1015	probable transcriptional regulator [Pseudomonas aeruginosa PAO1]	-0.588613	0.0177951	0.190974
9948765	Probable transcriptional regulator	PA2692						PA2692	probable transcriptional regulator [Pseudomonas aeruginosa PAO1]	-0.591258	0.141681	0.41761
9948440	Ferripyoverdine receptor	fpvA	PA2398					PA2398	ferripyoverdine receptor [Pseudomonas aeruginosa PAO1]	-0.591572	0.0475137	0.257885
9946457	Uncharacterized protein	PA0586						PA0586	conserved hypothetical protein [Pseudomonas aeruginosa PAO1]	-0.59428	0.0214633	0.200512
9949738	Glycerol-3-phosphate regulon repressor	glpR	PA3583					PA3583	glycerol-3-phosphate regulon repressor [Pseudomonas aeruginosa PAO1]	-0.594445	0.18702	0.465774
9950506	Uncharacterized protein	PA4286						PA4286	hypothetical protein PA4286 [Pseudomonas aeruginosa PAO1]	-0.594855	0.580893	0.772235
9946761	Probable oxidoreductase	PA0863						PA0863	probable oxidoreductase [Pseudomonas aeruginosa PAO1]	-0.59595	0.29271	0.559586
9951192	Probable chemotaxis transducer	PA4915						PA4915	probable chemotaxis transducer [Pseudomonas aeruginosa PAO1]	-0.595957	0.475398	0.707897
9949061	Uncharacterized protein	PA2963						PA2963	conserved hypothetical protein [Pseudomonas aeruginosa PAO1]	-0.596216	0.100093	0.362453
9947355	Uncharacterized protein	PA1408						PA1408	hypothetical protein PA1408 [Pseudomonas aeruginosa PAO1]	-0.59685	0.0412834	0.247303
9948620	Uncharacterized protein	PA2560						PA2560	hypothetical protein PA2560 [Pseudomonas aeruginosa PAO1]	-0.597952	0.0455374	0.25417
9950138	Probable ATP-dependent RNA helicase	PA3950						PA3950	probable ATP-dependent RNA helicase [Pseudomonas aeruginosa PAO1]	-0.600059	0.23482	0.511419
9951212	Uncharacterized protein	PA4933						PA4933	hypothetical protein PA4933 [Pseudomonas aeruginosa PAO1]	-0.600539	0.340997	0.603892
9948127	Pyroglutatmate porin OpdO	opdO	PA2113					PA2113	pyroglutatmate porin OpdO [Pseudomonas aeruginosa PAO1]	-0.601791	0.20029	0.478145
9948764	Uncharacterized protein	PA2691						PA2691	conserved hypothetical protein [Pseudomonas aeruginosa PAO1]	-0.601882	0.03939	0.245198
9950066	Uncharacterized protein	PA3886						PA3886	hypothetical protein PA3886 [Pseudomonas aeruginosa PAO1]	-0.602662	0.0356569	0.240531
9949080	Tetraacyldisaccharide 4'-kinase (EC 2.7.1.130) (Lipid A 4'-kinase)	lpxK	PA2981					PA2981	tetraacyldisaccharide 4*-kinase [Pseudomonas aeruginosa PAO1]	-0.603075	0.12064	0.390134
9951839	Methionine import ATP-binding protein MetN 2 (EC 3.6.3.-)	metN2	PA5503					PA5503	probable ATP-binding component of ABC transporter [Pseudomonas aeruginosa PAO1]	-0.603442	0.0795069	0.32635
9948425	Acyl-homoserine lactone acylase PvdQ (AHL acylase PvdQ) (Acyl-HSL acylase PvdQ) (EC 3.5.1.97) [Cleaved into: Acyl-homoserine lactone acylase PvdQ subunit alpha (Acyl-HSL acylase PvdQ subunit alpha); Acyl-homoserine lactone acylase PvdQ subunit beta (Acyl-HSL acylase PvdQ subunit beta)]	pvdQ	qsc112	PA2385				PA2385	3-oxo-C12-homoserine lactone acylase PvdQ [Pseudomonas aeruginosa PAO1]	-0.604769	0.0112816	0.161109
9948436	PvdO	pvdO	PA2395					PA2395	PvdO [Pseudomonas aeruginosa PAO1]	-0.604905	0.0857439	0.338531
9949565	Probable enoyl CoA-hydratase/isomerase	PA3426						PA3426	probable enoyl CoA-hydratase/isomerase [Pseudomonas aeruginosa PAO1]	-0.605365	0.100607	0.363758
9949491	Probable D-serine dehydratase (EC 4.3.1.18) (D-serine deaminase) (DSD)	dsdA	PA3357					PA3357	D-serine dehydratase [Pseudomonas aeruginosa PAO1]	-0.605572	0.156612	0.433414
9947577	Histidine kinase (EC 2.7.13.3)	PA1611						PA1611	probable sensor/response regulator hybrid [Pseudomonas aeruginosa PAO1]	-0.605858	0.0390163	0.245167
9950110	Probable acyl-CoA thiolase	PA3925						PA3925	probable acyl-CoA thiolase [Pseudomonas aeruginosa PAO1]	-0.606334	0.0358578	0.240791
9949680	Ferroxidase (EC 1.16.3.1)	bfrB	PA3531					PA3531	bacterioferritin [Pseudomonas aeruginosa PAO1]	-0.606404	0.0322979	0.232486
9946329	Uncharacterized protein	PA0468						PA0468	hypothetical protein PA0468 [Pseudomonas aeruginosa PAO1]	-0.606572	0.0581399	0.284789
9946211	Uncharacterized protein	PA0360						PA0360	hypothetical protein PA0360 [Pseudomonas aeruginosa PAO1]	-0.606677	0.0764514	0.322195
9949594	Probable malate:quinone oxidoreductase 1 (EC 1.1.5.4) (MQO 1) (Malate dehydrogenase [quinone] 1)	mqo1	mqoA	PA3452				PA3452	malate:quinone oxidoreductase [Pseudomonas aeruginosa PAO1]	-0.607	0.450516	0.690245
9950040	NAD(P)H-dependent anabolic L-arginine dehydrogenase DauB (EC 1.4.1.-)	dauB	PA3862					PA3862	NAD(P)H-dependent anabolic L-arginine dehydrogenase, DauB [Pseudomonas aeruginosa PAO1]	-0.610143	0.0833724	0.335908
9946109	Uncharacterized protein	PA0267						PA0267	hypothetical protein PA0267 [Pseudomonas aeruginosa PAO1]	-0.612057	0.344747	0.60697
9948320	Glucose dehydrogenase	gcd	PA2290					PA2290	glucose dehydrogenase [Pseudomonas aeruginosa PAO1]	-0.612621	0.0185656	0.193769
9951065	UPF0157 protein PA4798	PA4798						PA4798	hypothetical protein PA4798 [Pseudomonas aeruginosa PAO1]	-0.613478	0.82457	0.919607
9948711	NADH-quinone oxidoreductase subunit G (EC 1.6.5.11) (NADH dehydrogenase I subunit G) (NDH-1 subunit G)	nuoG	PA2642					PA2642	NADH dehydrogenase I chain G [Pseudomonas aeruginosa PAO1]	-0.613958	0.0152819	0.178259
15597598	Probable non-ribosomal peptide synthetase	PA2402						PA2402	peptide synthase [Pseudomonas aeruginosa PAO1]	-0.614587	0.00822319	0.140567
9951333	Type 4 fimbrial biogenesis protein PilN	pilN	PA5043					PA5043	type 4 fimbrial biogenesis protein PilN [Pseudomonas aeruginosa PAO1]	-0.615639	0.0190573	0.196482
9949877	Uncharacterized protein	PA3712						PA3712	hypothetical protein PA3712 [Pseudomonas aeruginosa PAO1]	-0.618099	0.0377372	0.242862
9950562	Uncharacterized protein	PA4336						PA4336	conserved hypothetical protein [Pseudomonas aeruginosa PAO1]	-0.619252	0.00325212	0.102208
9949142	Probable porin	PA3038						PA3038	probable porin [Pseudomonas aeruginosa PAO1]	-0.619505	0.0349988	0.238595
9946322	Uncharacterized protein	PA0461						PA0461	conserved hypothetical protein [Pseudomonas aeruginosa PAO1]	-0.619639	0.0707021	0.311308
9948889	NADPH-dependent 7-cyano-7-deazaguanine reductase (EC 1.7.1.13) (7-cyano-7-carbaguanine reductase) (NADPH-dependent nitrile oxidoreductase) (PreQ(0) reductase)	queF	PA2806					PA2806	conserved hypothetical protein [Pseudomonas aeruginosa PAO1]	-0.619996	0.0671044	0.302057
9947657	Enolase-phosphatase E1 (EC 3.1.3.77) (2,3-diketo-5-methylthio-1-phosphopentane phosphatase)	mtnC	PA1685					PA1685	enolase-phosphatase E-1 [Pseudomonas aeruginosa PAO1]	-0.621896	0.455779	0.694702
9950566	Uncharacterized protein	PA4340						PA4340	hypothetical protein PA4340 [Pseudomonas aeruginosa PAO1]	-0.621945	0.106052	0.369158
9947576	3-hydroxydecanoyl-[acyl-carrier-protein] dehydratase (EC 4.2.1.59) (3-hydroxyacyl-[acyl-carrier-protein] dehydratase FabA) (Beta-hydroxydecanoyl thioester dehydrase) (Trans-2-decenoyl-[acyl-carrier-protein] isomerase) (EC 5.3.3.14)	fabA	PA1610					PA1610	beta-hydroxydecanoyl-ACP dehydrase [Pseudomonas aeruginosa PAO1]	-0.622276	0.0394643	0.245198
9945857	Tryptophan synthase beta chain (EC 4.2.1.20)	trpB	PA0036					PA0036	tryptophan synthase beta chain [Pseudomonas aeruginosa PAO1]	-0.622656	0.152488	0.431705
9951377	Uncharacterized protein	PA5083						PA5083	conserved hypothetical protein [Pseudomonas aeruginosa PAO1]	-0.623326	0.044062	0.250675
9946756	Uncharacterized protein	PA0859						PA0859	hypothetical protein PA0859 [Pseudomonas aeruginosa PAO1]	-0.623465	0.0641515	0.294673
9946859	Probable thioredoxin	PA0953						PA0953	probable thioredoxin [Pseudomonas aeruginosa PAO1]	-0.626235	0.0421366	0.247303
9949801	Probable amino acid permease	PA3641						PA3641	probable amino acid permease [Pseudomonas aeruginosa PAO1]	-0.626237	0.20536	0.484652
9951400	Uncharacterized protein	PA5104						PA5104	conserved hypothetical protein [Pseudomonas aeruginosa PAO1]	-0.627535	0.226589	0.504532
9947625	Probable glutathione S-transferase	PA1655						PA1655	probable glutathione S-transferase [Pseudomonas aeruginosa PAO1]	-0.628436	0.709338	0.853591
9946245	Uncharacterized protein PA0392	PA0392						PA0392	conserved hypothetical protein [Pseudomonas aeruginosa PAO1]	-0.628751	0.202907	0.480987
9945906	Fha1	fha1	PA0081					PA0081	Fha1 [Pseudomonas aeruginosa PAO1]	-0.629333	0.282932	0.554108
9947490	DNA polymerase subunits gamma and tau	dnaX	PA1532					PA1532	DNA polymerase subunits gamma and tau [Pseudomonas aeruginosa PAO1]	-0.63145	0.120957	0.390134
9948411	Uncharacterized protein	PA2372						PA2372	hypothetical protein PA2372 [Pseudomonas aeruginosa PAO1]	-0.632013	0.0537635	0.273568
9949158	Uncharacterized protein	PA3052						PA3052	hypothetical protein PA3052 [Pseudomonas aeruginosa PAO1]	-0.63341	0.320043	0.586886
9950213	UDP-N-acetylmuramate--L-alanyl-gamma-D-glutamyl-meso-2,6-diaminoheptandioate ligase (EC 6.3.2.45) (Murein peptide ligase) (UDP-N-acetylmuramate:L-alanyl-gamma-D-glutamyl-meso-diaminopimelate ligase)	mpl	PA4020					PA4020	UDP-N-acetylmuramate:L-alanyl-gamma-D-glutamyl-meso-diaminopimelate ligase [Pseudomonas aeruginosa PAO1]	-0.633629	0.0222853	0.205706
9947282	Probable binding protein component of ABC transporter	PA1342						PA1342	probable binding protein component of ABC transporter [Pseudomonas aeruginosa PAO1]	-0.633773	0.132195	0.406482
9949396	Probable two-component sensor	PA3271						PA3271	probable two-component sensor [Pseudomonas aeruginosa PAO1]	-0.634012	0.252499	0.524233
9949269	B-band O-antigen polymerase	wzy	PA3154					PA3154	B-band O-antigen polymerase [Pseudomonas aeruginosa PAO1]	-0.634122	0.0134162	0.170173
9947866	Probable ATP-binding/permease fusion ABC transporter	PA1876						PA1876	probable ATP-binding/permease fusion ABC transporter [Pseudomonas aeruginosa PAO1]	-0.634852	0.0526537	0.27165
9949126	Probable lipid kinase YegS-like (EC 2.7.1.-)	PA3023						PA3023	conserved hypothetical protein [Pseudomonas aeruginosa PAO1]	-0.63597	0.535569	0.746886
9948091	Kynureninase (EC 3.7.1.3) (L-kynurenine hydrolase)	kynU	PA2080					PA2080	kynureninase KynU [Pseudomonas aeruginosa PAO1]	-0.636757	0.0467201	0.255339
9950696	Lipopolysaccharide export system protein LptA	lptA	PA4460					PA4460	conserved hypothetical protein [Pseudomonas aeruginosa PAO1]	-0.636865	0.0484238	0.26043
9947579	Uncharacterized protein	PA1613						PA1613	hypothetical protein PA1613 [Pseudomonas aeruginosa PAO1]	-0.637176	0.0550983	0.276194
9950885	Uncharacterized protein	PA4632						PA4632	hypothetical protein PA4632 [Pseudomonas aeruginosa PAO1]	-0.638338	0.111801	0.379257
9950634	Arginine biosynthesis bifunctional protein ArgJ [Cleaved into: Arginine biosynthesis bifunctional protein ArgJ alpha chain; Arginine biosynthesis bifunctional protein ArgJ beta chain] [Includes: Glutamate N-acetyltransferase (EC 2.3.1.35) (Ornithine acetyltransferase) (OATase) (Ornithine transacetylase); Amino-acid acetyltransferase (EC 2.3.1.1) (N-acetylglutamate synthase) (AGSase)]	argJ	PA4402					PA4402	glutamate N-acetyltransferase [Pseudomonas aeruginosa PAO1]	-0.639026	0.0258996	0.214393
9949447	Uncharacterized protein	PA3317						PA3317	hypothetical protein PA3317 [Pseudomonas aeruginosa PAO1]	-0.639807	0.0194916	0.197509
9950862	Uncharacterized protein	PA4611						PA4611	hypothetical protein PA4611 [Pseudomonas aeruginosa PAO1]	-0.641294	0.0230339	0.207827
9945969	Alkyl hydroperoxide reductase subunit C	ahpC	PA0139					PA0139	alkyl hydroperoxide reductase subunit C [Pseudomonas aeruginosa PAO1]	-0.641448	0.430724	0.674364
9947523	Aconitate hydratase A (ACN) (Aconitase) (EC 4.2.1.3) ((2R,3S)-2-methylisocitrate dehydratase) ((2S,3R)-3-hydroxybutane-1,2,3-tricarboxylate dehydratase) (Iron-responsive protein-like) (IRP-like) (Probable 2-methyl-cis-aconitate hydratase) (EC 4.2.1.99) (RNA-binding protein)	acnA	PA1562					PA1562	aconitate hydratase 1 [Pseudomonas aeruginosa PAO1]	-0.642529	0.00592231	0.122281
9950880	Ribosomal RNA small subunit methyltransferase C (EC 2.1.1.172) (16S rRNA m2G1207 methyltransferase) (rRNA (guanine-N(2)-)-methyltransferase RsmC)	rsmC	PA4627					PA4627	conserved hypothetical protein [Pseudomonas aeruginosa PAO1]	-0.643323	0.471518	0.705313
9951354	Uncharacterized protein	PA5062						PA5062	conserved hypothetical protein [Pseudomonas aeruginosa PAO1]	-0.64706	0.0556112	0.27743
9947406	Site-determining protein	fleN	PA1454					PA1454	flagellar synthesis regulator FleN [Pseudomonas aeruginosa PAO1]	-0.647959	0.0616075	0.292452
9950208	Uncharacterized protein	PA4015						PA4015	conserved hypothetical protein [Pseudomonas aeruginosa PAO1]	-0.648439	0.0128599	0.166825
258588443	2-heptyl-4(1H)-quinolone synthase PqsD (PqsD) (EC 2.3.1.230)	pqsD	PA0999					PA0999	Chain A, Crystal Structure Of Pseudomonas Aeruginosa Pqsd In A Covalent Complex With Anthranilate	-0.649068	0.488924	0.715207
9951812	Proton-glutamate symporter	gltP	PA5479					PA5479	proton-glutamate symporter [Pseudomonas aeruginosa PAO1]	-0.649595	0.449836	0.689652
9950595	BifA	bifA	PA4367					PA4367	BifA [Pseudomonas aeruginosa PAO1]	-0.649911	0.559683	0.761181
9950018	Probable chaperone	PA3842						PA3842	probable chaperone [Pseudomonas aeruginosa PAO1]	-0.650269	0.355729	0.614865
9947460	Probable transcriptional regulator	PA1504						PA1504	probable transcriptional regulator [Pseudomonas aeruginosa PAO1]	-0.651117	0.114117	0.382371
15595705	Probable acyl-CoA dehydrogenase	PA0508						PA0508	acyl-CoA dehydrogenase [Pseudomonas aeruginosa PAO1]	-0.651704	0.0104776	0.154611
9950144	Uncharacterized protein	PA3956						PA3956	hypothetical protein PA3956 [Pseudomonas aeruginosa PAO1]	-0.652426	0.933028	0.965752
9947229	Uncharacterized protein	PA1293						PA1293	hypothetical protein PA1293 [Pseudomonas aeruginosa PAO1]	-0.65256	0.037716	0.242862
9950198	Probable nicotinate-nucleotide adenylyltransferase (EC 2.7.7.18) (Deamido-NAD(+) diphosphorylase) (Deamido-NAD(+) pyrophosphorylase) (Nicotinate mononucleotide adenylyltransferase) (NaMN adenylyltransferase)	nadD	PA4006					PA4006	nicotinic acid mononucleotide adenylyltransferase [Pseudomonas aeruginosa PAO1]	-0.652874	0.295537	0.562259
9948926	ATP-dependent RNA helicase DeaD (EC 3.6.4.13) (Cold-shock DEAD box protein A)	deaD	PA2840					PA2840	probable ATP-dependent RNA helicase [Pseudomonas aeruginosa PAO1]	-0.654319	0.130935	0.406482
9948275	Lipoamide acyltransferase component of branched-chain alpha-keto acid dehydrogenase complex (EC 2.3.1.168) (Branched-chain alpha-keto acid dehydrogenase complex component E2) (BCKAD-E2) (BCKADE2) (Dihydrolipoamide acetyltransferase component of branched-chain alpha-keto acid dehydrogenase complex) (Dihydrolipoamide branched chain transacylase) (Dihydrolipoyllysine-residue (2-methylpropanoyl)trans…	bkdB	PA2249					PA2249	branched-chain alpha-keto acid dehydrogenase (lipoamide component) [Pseudomonas aeruginosa PAO1]	-0.654743	0.00708215	0.133339
9947757	Outer membrane porin F	oprF	PA1777					PA1777	Major porin and structural outer membrane porin OprF precursor [Pseudomonas aeruginosa PAO1]	-0.655041	0.0406852	0.246774
9950666	50S ribosomal protein L13	rplM	PA4433					PA4433	50S ribosomal protein L13 [Pseudomonas aeruginosa PAO1]	-0.655622	0.410962	0.659606
9950485	30S ribosomal protein S7	rpsG	PA4267					PA4267	30S ribosomal protein S7 [Pseudomonas aeruginosa PAO1]	-0.65626	0.00352156	0.10393
9949342	CsaA protein	csaA	PA3221					PA3221	CsaA protein [Pseudomonas aeruginosa PAO1]	-0.659164	0.142401	0.418171
9950735	Probable binding protein component of ABC transporter	PA4496						PA4496	probable binding protein component of ABC transporter [Pseudomonas aeruginosa PAO1]	-0.662415	0.0127685	0.166825
9948567	Anthranilate dioxygenase small subunit	antB	PA2513					PA2513	anthranilate dioxygenase small subunit [Pseudomonas aeruginosa PAO1]	-0.665148	0.275204	0.551109
9949490	Uncharacterized protein	PA3356						PA3356	conserved hypothetical protein [Pseudomonas aeruginosa PAO1]	-0.665832	0.897128	0.946857
9945874	Potential phenazine-modifying enzyme	phzH	PA0051					PA0051	potential phenazine-modifying enzyme [Pseudomonas aeruginosa PAO1]	-0.66685	0.0419959	0.247303
9949373	Uncharacterized protein	PA3250						PA3250	hypothetical protein PA3250 [Pseudomonas aeruginosa PAO1]	-0.667372	0.0331387	0.23466
9945979	Adenine deaminase (ADE) (EC 3.5.4.2) (Adenine aminohydrolase) (AAH)	PA0148						PA0148	probable adenosine deaminase [Pseudomonas aeruginosa PAO1]	-0.667619	0.0461614	0.255339
9950266	Probable epimerase	PA4068						PA4068	probable epimerase [Pseudomonas aeruginosa PAO1]	-0.668755	0.35146	0.611731
9950911	Uncharacterized protein	PA4657						PA4657	hypothetical protein PA4657 [Pseudomonas aeruginosa PAO1]	-0.66957	0.0500302	0.265441
9946986	High-affinity branched-chain amino acid transport ATP-binding protein BraG	braG	PA1070					PA1070	branched-chain amino acid transport protein BraG [Pseudomonas aeruginosa PAO1]	-0.669653	0.592036	0.779108
9949247	Glutamate--tRNA ligase (EC 6.1.1.17) (Glutamyl-tRNA synthetase) (GluRS)	gltX	PA3134					PA3134	glutamyl-tRNA synthetase [Pseudomonas aeruginosa PAO1]	-0.673984	0.00494015	0.11907
9948793	Chloroperoxidase	cpo	PA2717					PA2717	chloroperoxidase precursor [Pseudomonas aeruginosa PAO1]	-0.675984	0.0134269	0.170173
9950611	Probable two-component response regulator	PA4381						PA4381	probable two-component response regulator [Pseudomonas aeruginosa PAO1]	-0.677821	0.137508	0.413253
9949063	3-oxoacyl-[acyl-carrier-protein] synthase 2 (EC 2.3.1.179)	fabF1	PA2965					PA2965	beta-ketoacyl-acyl carrier protein synthase II [Pseudomonas aeruginosa PAO1]	-0.679111	0.00494467	0.11907
9951427	Protein-export protein SecB	secB	PA5128					PA5128	secretion protein SecB [Pseudomonas aeruginosa PAO1]	-0.679336	0.00901301	0.145135
9951390	Probable permease of ABC transporter	PA5095						PA5095	probable permease of ABC transporter [Pseudomonas aeruginosa PAO1]	-0.679956	0.0628664	0.293881
9951910	Ribonuclease P protein component (RNase P protein) (RNaseP protein) (EC 3.1.26.5) (Protein C5)	rnpA	PA5569					PA5569	ribonuclease P protein component [Pseudomonas aeruginosa PAO1]	-0.680884	0.0464849	0.255339
9946138	Transcriptional regulator AguR	aguR	PA0294					PA0294	transcriptional regulator AguR [Pseudomonas aeruginosa PAO1]	-0.680958	0.0129413	0.166964
9951442	Imidazole glycerol phosphate synthase subunit HisH 1 (EC 2.4.2.-) (IGP synthase glutamine amidotransferase subunit 1) (IGP synthase subunit HisH 1) (ImGP synthase subunit HisH 1) (IGPS subunit HisH 1)	hisH1	PA5142					PA5142	glutamine amidotransferase [Pseudomonas aeruginosa PAO1]	-0.681789	0.0797559	0.32635
9949551	Uncharacterized protein	PA3413						PA3413	conserved hypothetical protein [Pseudomonas aeruginosa PAO1]	-0.683689	0.0589831	0.286299
9951250	Uncharacterized protein	PA4968						PA4968	conserved hypothetical protein [Pseudomonas aeruginosa PAO1]	-0.684288	0.668119	0.828481
9947106	Uncharacterized protein	PA1181						PA1181	conserved hypothetical protein [Pseudomonas aeruginosa PAO1]	-0.686103	0.0120424	0.16627
9951429	Uncharacterized protein	PA5130						PA5130	conserved hypothetical protein [Pseudomonas aeruginosa PAO1]	-0.686227	0.0442265	0.250788
9951454	Amino acid (Lysine/arginine/ornithine/histidine/octopine) ABC transporter periplasmic binding protein	PA5153						PA5153	amino acid (lysine/arginine/ornithine/histidine/octopine) ABC transporter periplasmic binding protein [Pseudomonas aeruginosa PAO1]	-0.686374	0.0775779	0.324179
9947412	MotC	motC	PA1460					PA1460	MotC [Pseudomonas aeruginosa PAO1]	-0.689567	0.0557433	0.27743
9949723	3-hydroxyisobutyrate dehydrogenase (HIBADH) (EC 1.1.1.31)	mmsB	PA3569					PA3569	3-hydroxyisobutyrate dehydrogenase [Pseudomonas aeruginosa PAO1]	-0.69028	0.0267395	0.214459
9951092	Uncharacterized protein	PA4824						PA4824	hypothetical protein PA4824 [Pseudomonas aeruginosa PAO1]	-0.690294	0.0136919	0.170486
9947582	Uncharacterized protein	PA1616						PA1616	conserved hypothetical protein [Pseudomonas aeruginosa PAO1]	-0.690402	0.0452997	0.253442
9949440	Uncharacterized signaling protein PA3311	PA3311						PA3311	conserved hypothetical protein [Pseudomonas aeruginosa PAO1]	-0.694074	0.276612	0.55147
9949146	Uncharacterized protein	PA3041						PA3041	hypothetical protein PA3041 [Pseudomonas aeruginosa PAO1]	-0.694187	0.126889	0.40242
9948223	Uncharacterized protein	PA2201						PA2201	hypothetical protein PA2201 [Pseudomonas aeruginosa PAO1]	-0.694548	0.0474073	0.257885
9950248	N utilization substance protein B homolog (Protein NusB)	nusB	PA4052					PA4052	NusB protein [Pseudomonas aeruginosa PAO1]	-0.694766	0.0591757	0.286299
9949629	Uncharacterized protein	PA3484						PA3484	hypothetical protein PA3484 [Pseudomonas aeruginosa PAO1]	-0.695836	0.0349441	0.238595
9950859	Cyclic diguanosine monophosphate-binding protein PA4608 (c-di-GMP-binding protein PA4608) (Pilz domain-containing protein PA4608)	PA4608						PA4608	hypothetical protein PA4608 [Pseudomonas aeruginosa PAO1]	-0.696093	0.0352647	0.238729
9946981	Probable short-chain dehydrogenase	PA1066						PA1066	probable short-chain dehydrogenase [Pseudomonas aeruginosa PAO1]	-0.697992	0.0520169	0.27165
9951871	Uncharacterized protein	PA5533						PA5533	hypothetical protein PA5533 [Pseudomonas aeruginosa PAO1]	-0.698457	0.366296	0.626685
9951348	Poly(3-hydroxyalkanoic acid) synthase 1	phaC1	PA5056					PA5056	poly(3-hydroxyalkanoic acid) synthase 1 [Pseudomonas aeruginosa PAO1]	-0.70076	0.0531247	0.271654
9951023	Chaperone protein DnaJ	dnaJ	PA4760					PA4760	DnaJ protein [Pseudomonas aeruginosa PAO1]	-0.701147	0.00203283	0.0857054
9946365	8-amino-7-oxononanoate synthase (AONS) (EC 2.3.1.47) (7-keto-8-amino-pelargonic acid synthase) (7-KAP synthase) (KAPA synthase) (8-amino-7-ketopelargonate synthase)	bioF	PA0501					PA0501	8-amino-7-oxononanoate synthase [Pseudomonas aeruginosa PAO1]	-0.703938	0.0302258	0.227374
9949773	Uncharacterized protein	PA3615						PA3615	hypothetical protein PA3615 [Pseudomonas aeruginosa PAO1]	-0.704278	0.153284	0.431705
9948398	Uncharacterized protein	PA2360						PA2360	hypothetical protein PA2360 [Pseudomonas aeruginosa PAO1]	-0.70524	0.0313646	0.229975
9951679	Uncharacterized protein	PA5359						PA5359	hypothetical protein PA5359 [Pseudomonas aeruginosa PAO1]	-0.706419	0.102711	0.367917
9950602	Uncharacterized protein	PA4373						PA4373	hypothetical protein PA4373 [Pseudomonas aeruginosa PAO1]	-0.707144	0.733289	0.870435
15597972	Uncharacterized protein	PA2776						PA2776	hypothetical protein PA2776 [Pseudomonas aeruginosa PAO1]	-0.708591	0.0165087	0.183853
9947175	Uncharacterized protein	PA1244						PA1244	hypothetical protein PA1244 [Pseudomonas aeruginosa PAO1]	-0.71044	0.00858258	0.141703
9950091	Uncharacterized protein	PA3908						PA3908	hypothetical protein PA3908 [Pseudomonas aeruginosa PAO1]	-0.711472	0.00626518	0.122281
9948901	Uncharacterized protein	PA2817						PA2817	hypothetical protein PA2817 [Pseudomonas aeruginosa PAO1]	-0.712225	0.0613947	0.292244
9949240	Uncharacterized protein	PA3127						PA3127	hypothetical protein PA3127 [Pseudomonas aeruginosa PAO1]	-0.714144	0.00367939	0.107192
9948856	Uncharacterized protein	PA2775						PA2775	hypothetical protein PA2775 [Pseudomonas aeruginosa PAO1]	-0.714169	0.228092	0.506132
9948917	Uncharacterized protein	PA2831						PA2831	conserved hypothetical protein [Pseudomonas aeruginosa PAO1]	-0.714558	0.0388059	0.245167
9946306	Glutaryl-CoA dehydrogenase	gcdH	PA0447					PA0447	glutaryl-CoA dehydrogenase [Pseudomonas aeruginosa PAO1]	-0.716425	0.0303233	0.227374
9948015	Methylcrotonyl-CoA carboxylase, alpha-subunit (Biotin-containing)	liuD	PA2012					PA2012	methylcrotonyl-CoA carboxylase, alpha-subunit (biotin-containing) [Pseudomonas aeruginosa PAO1]	-0.717233	0.0417118	0.247303
9951655	Guanylate kinase (EC 2.7.4.8) (GMP kinase)	gmk	PA5336					PA5336	guanylate kinase [Pseudomonas aeruginosa PAO1]	-0.718117	0.0368461	0.241838
9949276	O-antigen chain length regulator	wzz	PA3160					PA3160	O-antigen chain length regulator [Pseudomonas aeruginosa PAO1]	-0.719208	0.197474	0.475911
9946983	Probable heat shock protein (Hsp90 family)	PA1068						PA1068	probable heat shock protein (hsp90 family) [Pseudomonas aeruginosa PAO1]	-0.719797	0.140202	0.414822
[truncated: 360 more rows]
